# Supplementary material
Source: PubMed Central journal article supplement (PMC8040042)
Supplement: ml0c00547_si_001.pdf [file ml0c00547_si_001.pdf]

## **Supporting Information**

### **Discovery of 2,4-1*H*-imidazole carboxamides as potent and selective TAK1 inhibitors**

Johan J. N. Veerman,<sup>§\*</sup> Yorik B. Bruseker,<sup>†</sup> Eddy Damen,<sup>†</sup> Erik H. Heijne,<sup>†</sup> Wendy van Bruggen,<sup>†</sup> Koen F. W. Hekking,<sup>†</sup> Rob Winkel,<sup>†</sup> Christopher D. Hupp,<sup>‡</sup> Anthony D. Keefe,<sup>‡</sup> Julie Liu,<sup>1</sup> Heather A. Thomson,<sup>‡a</sup> Ying Zhang,<sup>‡</sup> John W. Cuzzo,<sup>‡</sup> Andrew J. McRiner,<sup>‡</sup> Mark J. Mulvihill,<sup>2</sup> Peter van Rijsbergen,<sup>3</sup> Birgit Zech,<sup>4</sup> Louis M. Renzetti,<sup>5</sup> Lee Babiss,<sup>6</sup> and Gerhard Müller<sup>4</sup>

<sup>§</sup>ZoBio BV, J.H. Oortweg 19, 2333 CH Leiden, The Netherlands

<sup>†</sup>Mercachem BV, Department of Medicinal Chemistry, Kerkenbos 1013, 6546 BB Nijmegen, The Netherlands

<sup>‡</sup>X-Chem, Inc., 100 Beaver Street, Waltham, MA 02453, United States

<sup>1</sup>Civetta Therapeutics, 10 Wilson Road, Cambridge, MA 02138, United States

<sup>2</sup>HiberCell Inc., New York, NY 10019, United States

<sup>3</sup>Gendt, 6691EN, The Netherlands

<sup>4</sup>AnavoTherapeutics BV, J.H. Oortweg 19, 2333 CH Leiden, The Netherlands

<sup>5</sup>Bridge medicines LLC, New York, NY 10017, United States

<sup>6</sup>Wilmington, NC 28405, United States

**Table of contents:**

|                                                     |                |
|-----------------------------------------------------|----------------|
| <b>Chemistry Experimental Section:</b>              | <b>S3–S31</b>  |
| <b>Procedures for solubility, S9 and Caco assay</b> | <b>S32–S33</b> |
| <b>Procedures for enzyme and cell assays</b>        | <b>S34–S35</b> |
| <b>Description of DECL screen</b>                   | <b>S36</b>     |
| <b>Kinomescan data compounds 22 and 54</b>          | <b>S37–58</b>  |
| <b>Crystallography experimental data</b>            | <b>S59–60</b>  |
| <b>Supplementary Figure 1</b>                       | <b>S61</b>     |

**General Experimental Methods.** All solvents and reagents were used as purchased from commercial suppliers without further purification. Starting materials which were not commercially available were synthesized by previously reported methods. Flash column chromatography was performed using prepacked silica gel (20–40 mesh) columns. Analytical thin-layer chromatography was performed on Merck 60 F254 glass plates. Visualization was accomplished with UV light, iodine, anisaldehyde or potassium permanganate, followed by heating. Standard <sup>1</sup>H NMR spectra were recorded in CDCl<sub>3</sub> or DMSO-*d*<sub>6</sub> on a 400 MHz Bruker spectrometer and are reported in ppm using TMS (0.00 ppm) as an internal standard.

### **LCMS analytical methods:**

Method A: Apparatus: Agilent 1260 Bin. Pump: G1312B, degasser; autosampler, ColCom, DAD: Agilent G1315D, 220-320 nm, MSD: Agilent LC/MSD G6130B ESI, pos/neg 100-800, ELSD Alltech 3300 gas flow 1.5 ml/min, gas temp: 40°C; column: Waters XSelect™ C18, 30x2.1mm, 3.5μ Temp: 35 °C, Flow: 1 mL/min, Gradient: t<sub>0</sub> = 5% A, t<sub>1.6min</sub> = 98% A, t<sub>3min</sub> = 98% A, Posttime: 1.3 min, Eluent A: 0.1% formic acid in acetonitrile, Eluent B: 0.1% formic acid in water).

Method B: Apparatus: Agilent 1260 Bin. Pump: G1312B, degasser; autosampler, ColCom, DAD: Agilent G1315D, 220-320 nm, MSD: Agilent LC/MSD G6130B ESI, pos/neg 100-800, ELSD Alltech 3300 gas flow 1.5 ml/min, gas temp: 40°C; column: Waters XSelect™ C18, 50x2.1mm, 3.5μ, Temp: 35 °C, Flow: 0.8 mL/min, Gradient: t<sub>0</sub> = 5% A, t<sub>3.5min</sub> = 98% A, t<sub>6min</sub> = 98% A, Posttime: 2 min; Eluent A: 0.1% formic acid in acetonitrile, Eluent B: 0.1% formic acid in water).

Method C: Apparatus: Agilent 1260 Bin. Pump: G1312B, degasser; autosampler, ColCom, DAD: Agilent G1315C, 220-320 nm, MSD: Agilent LC/MSD G6130B ESI, pos/neg 100-800; column: Waters XSelect™ CSH C18, 50x2.1mm, 3.5μ, Temp: 25 °C, Flow: 0.8 mL/min, Gradient: t<sub>0</sub> = 5% A, t<sub>3.5min</sub> = 98% A, t<sub>6min</sub> = 98% A, Posttime: 2 min, Eluent A: 95% acetonitrile + 5% 10mM ammoniumbicarbonate in water in acetonitrile, Eluent B: 10mM ammoniumbicarbonate in water (pH=9.5).

Method D: Apparatus: Agilent 1260 Bin. Pump: G1312B, degasser; autosampler, ColCom, DAD: Agilent G1315C, 220-320 nm, MSD: Agilent LC/MSD G6130B ESI, pos/neg 100-800; column: Waters XSelect™ CSH C18, 30x2.1mm, 3.5μ, Temp: 25 °C, Flow: 1 mL/min, Gradient: t<sub>0</sub> = 5% A, t<sub>1.6min</sub> = 98% A, t<sub>3min</sub> = 98% A, Posttime: 1.3 min, Eluent A: 95% acetonitrile + 5% 10mM ammoniumbicarbonate in water in acetonitrile, Eluent B: 10mM ammoniumbicarbonate in water (pH=9.5).

### **Reversed phase chromatography:**

Method A: Instrument type: Reveleris™ prep MPLC; Column: Phenomenex LUNA C18 (150x25 mm, 10μ); Flow: 40 mL/min; Column temp: room temperature; Eluent A: 0.1% (v/v) Formic acid in water, Eluent B: 0.1% (v/v) Formic acid in acetonitrile; Gradient: t=0 min 5% B, t=1 min 5% B, t=2 min 30% B, t=17 min 70% B, t=18 min 100% B, t=23 min 100% B; Detection UV: 220/254 nm.

Method B: Instrument type: Reveleris™ prep MPLC; Column: Waters XSelect CSH C18 (145x25 mm, 10μ); Flow: 40 mL/min; Column temp: room temperature; Eluent A: 10 mM ammoniumbicarbonate in water pH = 9.0; Eluent B: 99% acetonitrile + 1% 10 mM ammoniumbicarbonate in water; Gradient: t=0 min 5% B, t=1 min 5% B, t=2 min 30% B, t=17 min 70% B, t=18 min 100% B, t=23 min 100% B; Detection UV: 220/254 nm.

## Synthetic procedures for non-commercially available amines and intermediates:

### Synthesis of 2-((2-(difluoromethoxy)benzyl)amino)-*N*-methylacetamide

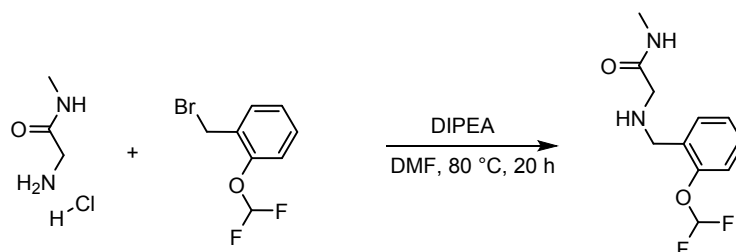

To a solution of 2-amino-*N*-methylacetamide hydrochloride (1.6 g, 12.9 mmol) and DIPEA (9.2 mL, 53 mmol) in *N,N*-dimethylformamide (50 mL) 1-(bromomethyl)-2-(difluoromethoxy)benzene (2.5 g, 10.55 mmol) was added and the mixture was stirred at 80 °C for 20 hours. The reaction mixture was partitioned between water and dichloromethane and the aqueous layer was extracted twice more with dichloromethane. The combined organic layers were dried with sodium sulfate, filtered, concentrated and the residue was purified by flash column chromatography (0 to 10% methanol in dichloromethane) to afford 2-((2-(difluoromethoxy)benzyl)amino)-*N*-methylacetamide (1.52 g, 59%) as an oil. <sup>1</sup>HNMR (400 MHz, CDCl<sub>3</sub>) δ 7.37 – 7.28 (m, 3H), 7.19 (t, *J* = 7.4 Hz, 1H), 7.11 (d, *J* = 8.2 Hz, 1H), 6.58 (t, *J* = 74.0 Hz, 1H), 3.79 (s, 2H), 3.29 (s, 2H), 2.84 (d, *J* = 5.0 Hz, 3H); LCMS (Method D): *t*<sub>R</sub> 1.73 min, LRMS (ESI) calcd. C<sub>11</sub>H<sub>14</sub>F<sub>2</sub>N<sub>2</sub>O<sub>2</sub> (M+H)<sup>+</sup> 245.1, found 245.0.

### Synthesis of (*R*)-2-((2-(difluoromethoxy)benzyl)amino)-*N*-methylpropanamide

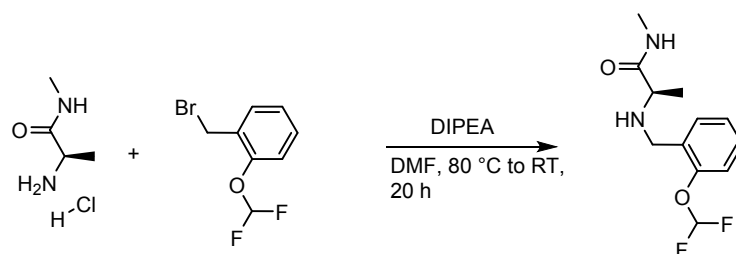

To a suspension of (*R*)-2-amino-*N*-methylpropanamide hydrochloride (1.35 g, 9.7 mmol) in *N,N*-dimethylformamide (22 mL) DIPEA (6.53 mL, 37.5 mmol) was added and the mixture was stirred at 80 °C until all the solids had dissolved. Next, 1-(bromomethyl)-2-(difluoromethoxy)benzene (1.78 g, 7.5 mmol) was added dropwise and the reaction mixture was stirred at 80 °C for 30 minutes and then at room temperature for 19 hours. The mixture was partitioned between water and dichloromethane and the aqueous layer was extracted twice more with dichloromethane. The combined organic layers were washed three times with water, brine, dried with sodium sulfate and concentrated. The residue was purified by flash column chromatography (50 to 100% ethyl acetate in heptane) to afford (*R*)-2-((2-(difluoromethoxy)benzyl)amino)-*N*-methylpropanamide (1.3 g, 67%) as an oil. <sup>1</sup>HNMR (400 MHz, CDCl<sub>3</sub>) δ 7.41 – 7.28 (m, 3H), 7.23 – 7.16 (m, 1H), 7.14 – 7.08 (m, 1H), 6.58 (t, *J* = 74.0 Hz, 1H), 3.82 (d, *J* = 12.8 Hz, 1H), 3.69 (d, *J* = 12.9 Hz, 1H), 3.23 (q, *J* = 6.9 Hz, 1H), 2.83 (d, *J* = 5.0 Hz, 3H), 1.30 (d, *J* = 7.0 Hz, 3H); LCMS (Method D): *t*<sub>R</sub> 1.91 min, LRMS (ESI) calcd.

$C_{12}H_{16}F_2N_2O_2$  (M+H)<sup>+</sup> 259.2, found 259.2 The corresponding *S*-enantiomer was made using the same procedure starting from (*S*)-2-amino-*N*-methylpropanamide hydrochloride.

### Synthesis of 2-((2-(difluoromethoxy)benzyl)amino)-*N*-methylbutanamide

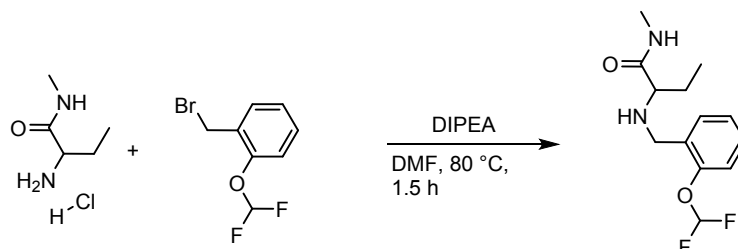

To a solution of 2-amino-*N*-methylbutanamide hydrochloride (1.19 g, 7.8 mmol) and DIPEA (5.66 mL, 32.5 mmol) in *N,N*-dimethylformamide (50 mL) 1-(bromomethyl)-2-(difluoromethoxy)benzene (1.54 g, 6.5 mmol) was added dropwise and the reaction mixture was stirred at 80 °C for 1.5 hours. The mixture was partitioned between water and dichloromethane and the aqueous layer was extracted twice more with dichloromethane. The combined organic layers were washed three times with water, brine, dried with sodium sulfate and concentrated. The residue was purified by flash column chromatography (0 to 5% methanol in dichloromethane) to afford 2-((2-(difluoromethoxy)benzyl)amino)-*N*-methylbutanamide (961 mg, 54%) as an oil. <sup>1</sup>HNMR (400 MHz, CDCl<sub>3</sub>) δ 7.41 – 7.28 (m, 3H), 7.19 (t, *J* = 7.2 Hz, 1H), 7.11 (d, *J* = 8.4 Hz, 1H), 6.58 (t, *J* = 74.0 Hz, 1H), 3.82 (d, *J* = 12.8 Hz, 1H), 3.65 (d, *J* = 12.8 Hz, 1H), 3.07 (dd, *J* = 7.6, 4.7 Hz, 1H), 2.84 (d, *J* = 5.0 Hz, 3H), 1.84 – 1.72 (m, 1H), 1.62 – 1.51 (m, 1H), 0.91 (t, *J* = 7.5 Hz, 3H); LCMS (Method D): *t*<sub>R</sub> 2.14 min, LRMS (ESI) calcd.  $C_{13}H_{18}F_2N_2O_2$  (M+H)<sup>+</sup> 273.3, found 273.2.

### Synthesis of 2-((3,4-dihydro-2*H*-benzo[*b*][1,4]dioxepin-6-yl)methylamino)-*N*-methylacetamide

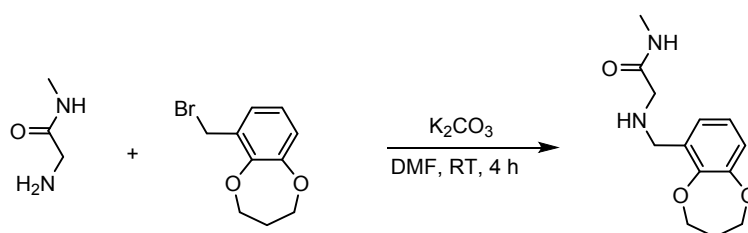

Under nitrogen atmosphere, a solution of 2-amino-*N*-methylacetamide (176 mg, 2.0 mmol), potassium carbonate (828 mg, 6.0 mmol,) and 6-(bromomethyl)-3,4-dihydro-2*H*-benzo[*b*][1,4]dioxepine (337 mg, 1.4 mmol) in DMF (6 mL) was stirred at room temperature for 4 hours. The mixture was concentrated, the residue was purified by reversed phase chromatography (method B) and the appropriate fractions were concentrated to afford 2-((3,4-dihydro-2*H*-benzo[*b*][1,4]dioxepin-6-yl)methylamino)-*N*-methylacetamide (138 mg, 39%) as a white solid. LRMS (ESI) calcd.  $C_{13}H_{18}N_2O_3$  (M+H)<sup>+</sup> 251.1, found 251.0.

### Synthesis of 2-((2-(difluoromethoxy)benzyl)amino)acetamide

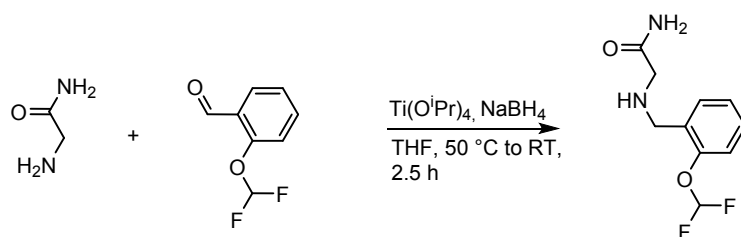

Under nitrogen atmosphere, 2-aminoacetamide (148 mg, 2.0 mmol) and 2-(difluoromethoxy)benzaldehyde (287 mg, 1.7 mmol) were dissolved in tetrahydrofuran (6 mL) followed by addition of  $\text{Ti}(\text{O}^i\text{Pr})_4$  (1.42 g, 5.0 mmol). The mixture was heated to 50 °C and stirred for one hour. Next, the mixture was cooled to room temperature,  $\text{NaBH}_4$  (95 mg, 2.5 mmol) was added and the mixture was heated to 50 °C for 90 minutes. The mixture was cooled to room temperature, quenched with water (2 mL) and concentrated. The residue was purified by reversed phase chromatography (method B) and the appropriate fractions were concentrated to afford 2-((2-(difluoromethoxy)benzyl)amino)acetamide (225 mg, 59%) as a white solid. LRMS (ESI) calcd.  $\text{C}_{10}\text{H}_{12}\text{F}_2\text{N}_2\text{O}_2$  ( $\text{M}+\text{H}$ )<sup>+</sup> 231.1, found 231.0.

The following amines were prepared using procedures analogous to the example above.

| Structure and compound name                                                                                                                                | Analytical data                                                                                                                                                            |
|------------------------------------------------------------------------------------------------------------------------------------------------------------|----------------------------------------------------------------------------------------------------------------------------------------------------------------------------|
| 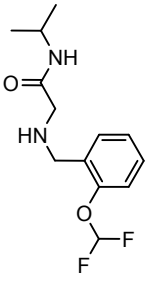 <p>2-((2-(difluoromethoxy)benzyl)amino)-<i>N</i>-isopropylacetamide</p> | <p>Yield 54%, LRMS (ESI) calcd. <math>\text{C}_{13}\text{H}_{18}\text{F}_2\text{N}_2\text{O}_2</math> (<math>\text{M}+\text{H}</math>)<sup>+</sup> 273.1, found 273.0.</p> |
|  <p><i>N</i>-(2-(difluoromethoxy)benzyl)-1-(oxazol-2-yl)methanamine</p> | <p>Yield 69%, LRMS (ESI) calcd. <math>\text{C}_{12}\text{H}_{12}\text{F}_2\text{N}_2\text{O}_2</math> (<math>\text{M}+\text{H}</math>)<sup>+</sup> 255.1, found 255.0.</p> |

|                                                                                                                                                             |                                                                                                                                          |
|-------------------------------------------------------------------------------------------------------------------------------------------------------------|------------------------------------------------------------------------------------------------------------------------------------------|
| 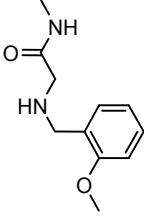 <p>2-((2-methoxybenzyl)amino)-<i>N</i>-methylacetamide</p>                | <p>Yield 59%, LRMS (ESI) calcd.<br/>C<sub>11</sub>H<sub>16</sub>N<sub>2</sub>O<sub>2</sub> (M+H)<sup>+</sup> 209.2,<br/>found 209.2.</p> |
|  <p>2-((2-ethoxybenzyl)amino)-<i>N</i>-methylacetamide</p>                 | <p>Yield 76%, LRMS (ESI) calcd.<br/>C<sub>12</sub>H<sub>18</sub>N<sub>2</sub>O<sub>2</sub> (M+H)<sup>+</sup> 223.3,<br/>found 223.2.</p> |
|  <p>2-(((1<i>H</i>-indol-4-yl)methyl)amino)-<i>N</i>-methylacetamide</p> | <p>Yield 74%, LCMS (ESI) calcd.<br/>C<sub>12</sub>H<sub>15</sub>N<sub>3</sub>O (M+H)<sup>+</sup> 218.1,<br/>found 218.1.</p>             |

### Synthesis of isoindoline-5-carboxamide hydrochloride

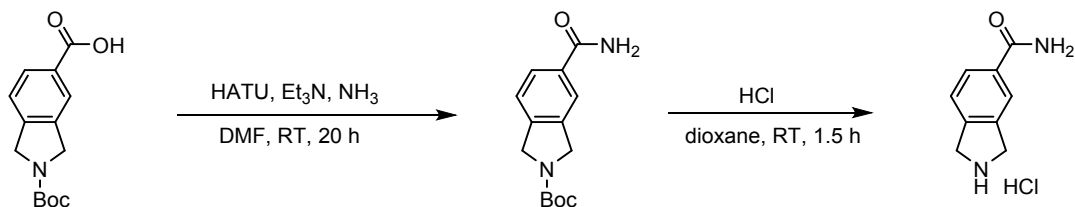

A solution of 2-(tert-butoxycarbonyl)isoindoline-5-carboxylic acid (998 mg, 3.79 mmol), HATU (1.44 g, 3.79 mmol) and triethylamine (0.63 mL, 4.5 mmol) in *N,N*-dimethylformamide (5 mL) was stirred at room temperature. After 1 hour ammonia (0.5M solution in 1,4-dioxane, 20 mL, 10 mmol) was added and a precipitate formed. After 20 hours, the reaction mixture was diluted with water and extracted three times with EtOAc. The combined organic layers were washed with water, four times with brine, dried over sodium sulfate and concentrated to afford

918 mg of tert-butyl 5-carbamoylisindoline-2-carboxylate (918 mg, 92%) as a white solid.  $^1\text{H}$  NMR (400 MHz,  $\text{CDCl}_3$ )  $\delta$  7.76 – 7.66 (m, 2H), 7.37 – 7.28 (m, 1H), 6.03 (s, 1H), 5.58 (s, 1H), 4.80 – 4.63 (m, 4H), 1.52 (s, 9H). Hydrochloric acid in dioxane (4 M in dioxane, 17.5 mL, 70 mmol) was added to a suspension of tert-butyl 5-carbamoylisindoline-2-carboxylate (918 mg, 3.50 mmol) in dry 1,4-dioxane (4 mL) and the reaction mixture was stirred at room temperature overnight. The mixture was concentrated to afford isoindoline-5-carboxamide hydrochloride (692 mg, 99%) as a cream coloured solid.  $^1\text{H}$  NMR (400 MHz,  $\text{DMSO-}d_6$ )  $\delta$  9.80 (s, 2H), 8.02 (s, 1H), 7.92 – 7.82 (m, 2H), 7.47 (d,  $J = 8.0$  Hz, 1H), 7.43 (s, 1H), 4.61 – 4.49 (m, 4H).

### Synthesis of 5-(tert-butyl) 2-ethyl 1*H*-imidazole-2,5-dicarboxylate (compound 23)

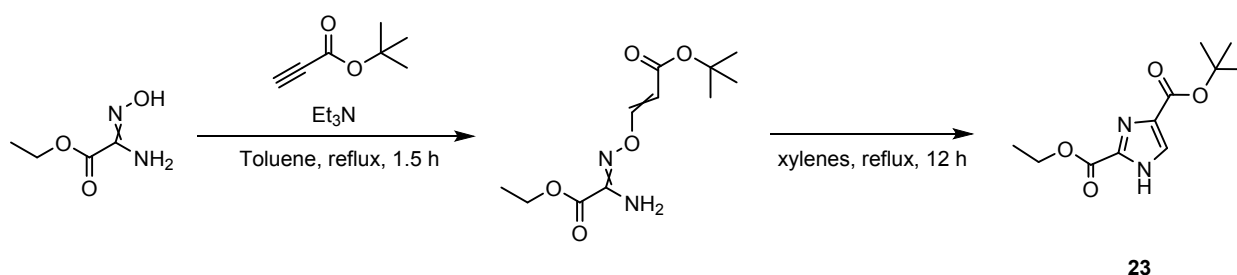

To a solution of ethyl 2-amino-2-(hydroxyimino)acetate (5.0 g, 37.8 mmol) and tert-butyl propiolate (4.77 g, 37.8 mmol) in dry toluene (100 mL) triethylamine (3.83 g, 37.8 mmol) was added and the resulting solution was heated at reflux for 1.5 hours. The mixture was concentrated and taken up in dichloromethane. The solution was washed with water, dried with sodium sulfate and concentrated. The crude product was purified by silica column chromatography (0% to 50% EtOAc in heptane) to afford tert-butyl 3-(((*E*)-1-amino-2-ethoxy-2-oxoethylidene)amino)oxy)acrylate (9.65 g, 99%) as an orange oil. LCMS (Method D):  $t_R$  2.05 min, LRMS (ESI) calcd.  $\text{C}_7\text{H}_{10}\text{N}_2\text{O}_5$  ( $\text{M-tBu+H}$ ) $^+$  203.1, found 203.0. A solution of tert-butyl 3-(((*E*)-1-amino-2-ethoxy-2-oxoethylidene)amino)oxy)acrylate (9.77 g, 37.8 mmol) was dissolved in xylenes (400 mL) and heated to reflux. Water was removed *via* azeotropic distillation with a Dean-Stark apparatus for 12 hours. The mixture was concentrated and purified by silica column chromatography (50% to 100% ethyl acetate in heptane) to afford 5-(tert-butyl) 2-ethyl 1*H*-imidazole-2,5-dicarboxylate (3.2 g, 35%) as an orange solid.  $^1\text{H}$ NMR (400 MHz,  $\text{CDCl}_3$ ) 2:3 mixture of tautomers  $\delta$  11.16 (s, 0.4H), 10.64 (s, 0.6H), 7.79 (s, 0.4H), 7.69 (s, 0.6H), 4.50 – 4.36 (m, 2H), 1.56 (s, 9H), 1.45 – 1.35 (m, 3H); LCMS (Method D):  $t_R$  1.79 min, LRMS (ESI) calcd.  $\text{C}_{11}\text{H}_{16}\text{N}_2\text{O}_4$  ( $\text{M+H}$ ) $^+$  241.1, found 241.0.

### Synthesis of 5-(tert-butyl) 2-ethyl 1*H*-imidazole-2,5-dicarboxylate (compound 24)

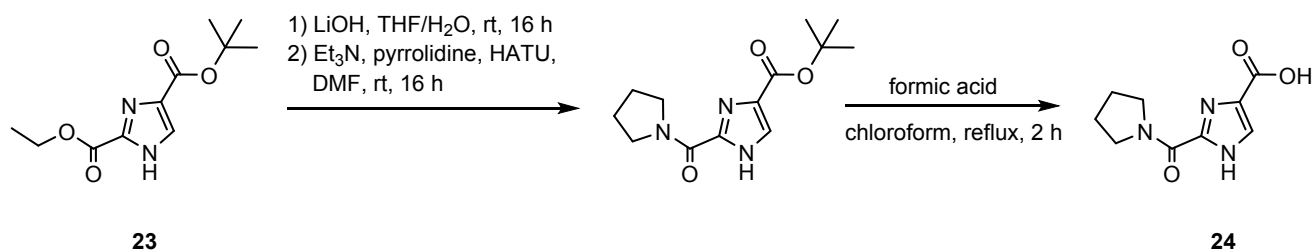



To a solution of 5-(tert-butyl) 2-ethyl 1*H*-imidazole-2,5-dicarboxylate (1.8 g, 7.5 mmol) in tetrahydrofuran (40 mL) a 2M solution of lithium hydroxide in water 2M (15 mL, 30 mmol) was added and the mixture was stirred at room temperature for 16 hours. The reaction mixture was acidified to ~pH 5 using HCl, concentrated, taken up in water/acetonitrile, frozen and lyophilized to afford 5-(tert-butoxycarbonyl)-1*H*-imidazole-2-carboxylic acid as a beige solid. LCMS (Method A):  $t_R$  1.43 min, LRMS (ESI) calcd.  $C_9H_{12}N_2O_4$  (M+H)<sup>+</sup> 213.1, found 213.0. The product from the previous step (7.5 mmol) and triethylamine (1.25 mL, 9 mmol) were dissolved in *N,N*-dimethylformamide (30 mL) and HATU (2.9 g, 7.5 mmol) was added. After stirring at room temperature for 15 minutes, pyrrolidine (0.74 mL, 9 mmol) was added and the mixture was stirred at room temperature for 16 hours. The mixture was poured into water and extracted with ethyl acetate (3x). The combined organic layers were washed with brine (2x), dried with sodium sulfate and concentrated to afford an orange oil. This was purified by silica column chromatography (50% ethyl acetate in heptane) to afford tert-butyl 2-(pyrrolidine-1-carbonyl)-1*H*-imidazole-5-carboxylate (717 mg, 36% over two steps) as a white solid. LCMS (Method A):  $t_R$  1.78 min, LRMS (ESI) calcd.  $C_{13}H_{19}N_3O_3$  (M+H)<sup>+</sup> 266.1, found 266.1. As solution of tert-butyl 2-(pyrrolidine-1-carbonyl)-1*H*-imidazole-5-carboxylate (500 mg, 1.89 mmol) was dissolved in chloroform (10 mL) and formic acid (10 mL) was refluxed for 2 hours. The mixture was concentrated and co-evaporated with chloroform to 2-(pyrrolidine-1-carbonyl)-1*H*-imidazole-5-carboxylic acid (375 mg, 95%) as a beige solid. <sup>1</sup>H NMR (400 MHz, DMSO-*d*<sub>6</sub>) mixture of rotamers  $\delta$  13.37 (br. s, 1H), 12.57 (br. s, 1H), 7.80 (s, 1H), 4.04 – 4.01 (m, 2H), 3.52 – 3.46 (m, 2H), 1.95 – 1.85 (m, 4H); LCMS (Method A):  $t_R$  1.14 min, LRMS (ESI) calcd.  $C_9H_{11}N_3O_3$  (M+H)<sup>+</sup> 210.1, found 210.1.

### Synthesis of 5-(tert-butyl) 2-ethyl 1*H*-imidazole-2,5-dicarboxylate (compound 26)

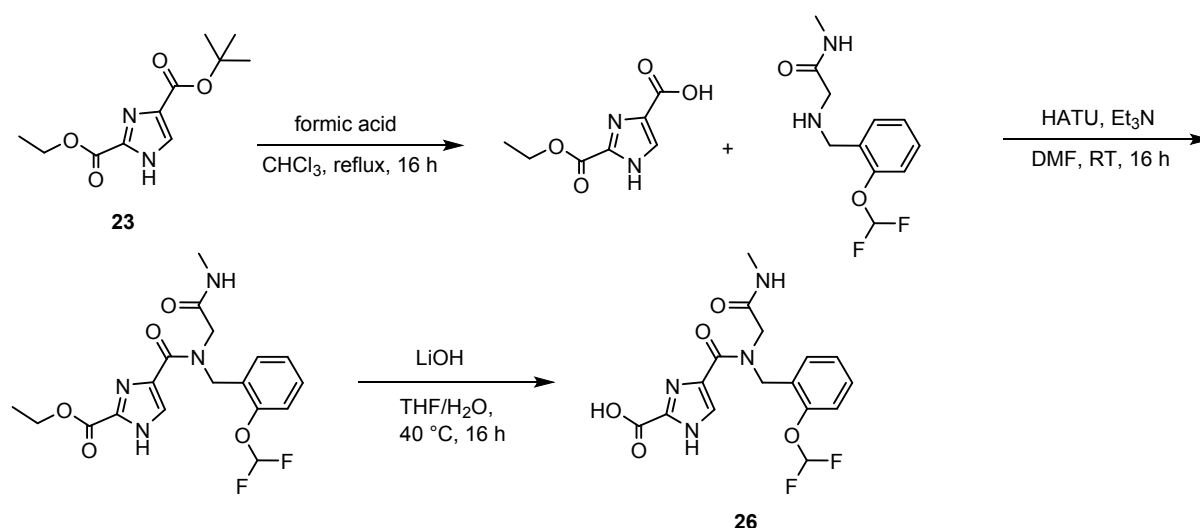

A mixture of 4-(tert-butyl) 2-ethyl 1*H*-imidazole-2,4-dicarboxylate (870 mg, 3.62 mmol) in chloroform (10 mL) and formic acid (10 mL) was refluxed for 16 hours. The mixture was cooled to room temperature, concentrated, taken up in water and lyophilized to afford 2-(ethoxycarbonyl)-1*H*-imidazole-4-carboxylic acid (590 mg, 88%) as a white solid. <sup>1</sup>H NMR (400 MHz, DMSO-*d*<sub>6</sub>)  $\delta$  13.80 (s, 1H), 12.59 (s, 1H), 7.93 (s, 1H), 4.33 (q,  $J$  = 7.1 Hz, 2H), 1.32 (t,  $J$  = 7.1 Hz, 3H). To a solution of 2-(ethoxycarbonyl)-1*H*-imidazole-4-carboxylic acid (1.0 g, 5.4 mmol) in *N,N*-dimethylformamide (11 mL), HATU (2.07 g, 5.4 mmol) and

triethylamine (1.9 mL, 13.6 mmol) were added. After 1 hour a solution of 2-((2-(difluoromethoxy)benzyl)amino)-*N*-methylacetamide (1.6, 6.5 mmol) in *N,N*-dimethylformamide (4 mL) was added and the reaction mixture was stirred at room temperature for 15 hours. The crude mixture was poured into water and extracted with EtOAc (2x). The combined organic layers were washed with water, brine (2x), dried with sodium sulfate and concentrated. The crude product was purified by silica column chromatography (60% to 100% ethyl acetate in heptane) to afford ethyl 4-((2-(difluoromethoxy)benzyl)(2-(methylamino)-2-oxoethyl)carbamoyl)-1*H*-imidazole-2-carboxylate (1.71 g, 77%) as a white solid. <sup>1</sup>H NMR (400 MHz, DMSO-*d*<sub>6</sub>) δ 8.02 – 7.91 (m, 1H), 7.83 (s, 1H), 7.45 – 6.94 (m, 5H), 5.41 (br s, 1H), 4.67 – 4.58 (m, 2H), 4.39 – 4.22 (m, 2H), 3.89 (s, 1H), 2.59 (d, *J* = 4.5 Hz, 3H), 1.40 – 1.21 (m, 3H). LCMS (Method D): t<sub>R</sub> 1.82 min, LRMS (ESI) calcd. C<sub>18</sub>H<sub>20</sub>F<sub>2</sub>N<sub>4</sub>O<sub>5</sub> (M+H)<sup>+</sup> 411.1, found 411.2. To a solution of 4-((2-(difluoromethoxy)benzyl)(2-(methylamino)-2-oxoethyl)carbamoyl)-1*H*-imidazole-2-carboxylate (1.7 g, 4.1 mmol) in tetrahydrofuran (50 mL) and water (5 mL) lithium hydroxide monohydrate (354 mg, 8.45 mmol) was added and the mixture was stirred at 40 °C for 16 hours. The mixture was concentrated to remove most of the THF, water (10 mL) was added and it was extracted with ethyl acetate. The water layer was separated, acidified to ~pH 3 using 1M HCl and extracted with ethyl acetate (5x). The combined organic layers were washed with brine, dried with sodium sulfate and concentrated to afford 4-((2-(difluoromethoxy)benzyl)(2-(methylamino)-2-oxoethyl)carbamoyl)-1*H*-imidazole-2-carboxylic acid (1.54 g, 98%) as a yellow solid. <sup>1</sup>H NMR (400 MHz, DMSO-*d*<sub>6</sub>) δ 8.01 – 7.72 (m, 2H), 7.43 – 6.99 (m, 5H), 5.41 (br s, 1H), 4.66 (br s, 1H), 4.60 (br s, 1H), 3.87 (br s, 1H), 2.58 (d, *J* = 4.0 Hz, 3H). LCMS (Method A): t<sub>R</sub> 1.54 min, LRMS (ESI) calcd. C<sub>16</sub>H<sub>16</sub>F<sub>2</sub>N<sub>4</sub>O<sub>5</sub> (M+H)<sup>+</sup> 383.1, found 383.1.

### Synthesis of 2,4-1*H*-pyrrole carboxamides:

**Representative example 1: *N*-(2-(difluoromethoxy)benzyl)-*N*-(2-(methylamino)-2-oxoethyl)-5-(pyrrolidine-1-carbonyl)-1*H*-pyrrole-3-carboxamide (compound 7).**

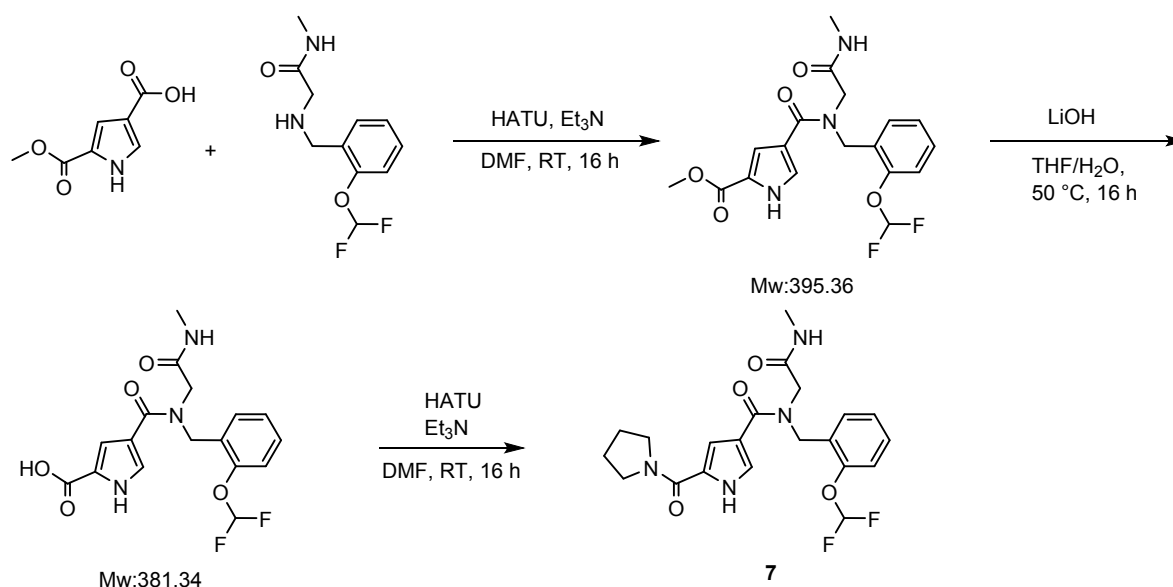

To a solution of 5-(methoxycarbonyl)-1*H*-pyrrole-3-carboxylic acid (53 mg, 0.31 mmol) in *N,N*-dimethylformamide (3 mL), HATU (106 mg, 0.8 mmol) and triethylamine (0.11 mL, 0.78

mmol) were added. After 30 minutes, a solution of 2-((2-(difluoromethoxy)benzyl)amino)-*N*-methylacetamide (93 mg, 0.38 mmol) in *N,N*-dimethylformamide (1 mL) was added and the reaction mixture was stirred at room temperature for 16 hours. The crude mixture was poured into water and extracted with EtOAc (2x). The combined organic layers were washed with water, brine (2x), dried with sodium sulfate and concentrated. The crude product was purified reversed phase chromatography (method B) and the appropriate fractions were lyophilized to afford methyl 4-((2-(difluoromethoxy)benzyl)(2-(methylamino)2-oxoethyl)carbamoyl)-1*H*-pyrrole-2-carboxylate (102 mg, 82%) as a white solid. LCMS (Method A):  $t_R$  1.73 min, LRMS (ESI) calcd.  $C_{18}H_{19}F_2N_3O_5$  (M+H)<sup>+</sup> 396.1, found 396.1. To a solution of 4-((2-(difluoromethoxy)benzyl)(2-(methylamino)2-oxoethyl)carbamoyl)-1*H*-pyrrole-2-carboxylate (100 mg, 0.25 mmol) in tetrahydrofuran (6 mL) 2M lithium hydroxide in water (0.4 mL, 0.8 mmol) was added and the mixture was stirred at 50 °C for 16 hours. The mixture was concentrated to remove most of the THF, acidified to ~pH 3 using 1M HCl and concentrated to afford 4-((2-(difluoromethoxy)benzyl)(2-(methylamino)-2-oxoethyl)carbamoyl)-1*H*-pyrrole-2-carboxylic acid. The product was used as such in the next step. LCMS (Method A):  $t_R$  1.64 min, LRMS (ESI) calcd.  $C_{17}H_{17}F_2N_3O_5$  (M+H)<sup>+</sup> 382.1, found 382.1. To a solution of 4-((2-(difluoromethoxy)benzyl)(2-(methylamino)-2-oxoethyl)carbamoyl)-1*H*-pyrrole-2-carboxylic acid (50 mg, 0.25 mmol) in *N,N*-dimethylformamide (3 mL), HATU (81 mg, 0.29 mmol) and triethylamine (50  $\mu$ L, 0.36 mmol) were added. After 30 minutes, pyrrolidine (25  $\mu$ L, 0.3 mmol) was added and the reaction mixture was stirred at room temperature for 16 hours. The reaction mixture was purified by reversed phase chromatography (method A) and the appropriate fractions were lyophilized to afford *N*-(2-(difluoromethoxy)benzyl)-*N*-(2-(methylamino)-2-oxoethyl)-5-(pyrrolidine-1-carbonyl)-1*H*-pyrrole-3-carboxamide (compound **7**, 53 mg, 49%) as a white solid. <sup>1</sup>H NMR (400 MHz, CD<sub>3</sub>OD):  $\delta$  7.42 – 7.25 (m, 4H), 6.90 – 6.72 (m, 2H), 4.97 (s, 2H), 4.14 (s, 2H), 3.75 – 3.45 (m, 4H), 2.78 (s, 3H), 2.01 – 1.93 (m, 4H). LCMS (Method C):  $t_R$  1.77 min, LRMS (ESI) calcd.  $C_{21}H_{24}F_2N_4O_4$  (M+H)<sup>+</sup> 435.2, found 435.2.

The following compounds were prepared using procedures analogous to representative Example 1.

| Compound # | Structure and compound name                                                                                                                                                                                                                                                          | Analytical data                                                                                                                                                                                                                                                                         |
|------------|--------------------------------------------------------------------------------------------------------------------------------------------------------------------------------------------------------------------------------------------------------------------------------------|-----------------------------------------------------------------------------------------------------------------------------------------------------------------------------------------------------------------------------------------------------------------------------------------|
| 17         | 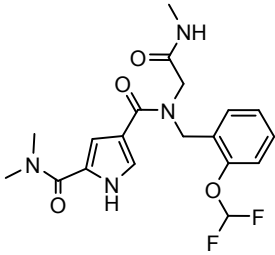 <p><i>N</i><sup>4</sup>-(2-(difluoromethoxy)benzyl)-<i>N</i><sup>2</sup>,<i>N</i><sup>2</sup>-dimethyl-<i>N</i><sup>4</sup>-(2-(methylamino)-2-oxoethyl)-1<i>H</i>-pyrrole-2,4-dicarboxamide</p> | Yield 20%, <sup>1</sup> H NMR (400 MHz, DMSO- <i>d</i> <sub>6</sub> ) $\delta$ 11.82 (s, 1H), 8.04 (s, 1H), 6.88 – 7.74 (m, 6H), 6.74 (s, 1H), 4.73 (d, 2H), 4.02 (s, 2H), 2.95 (d, 6H), 2.62 (d, 3H). LRMS (ESI) calcd. $C_{19}H_{22}F_2N_4O_4$ (M+H) <sup>+</sup> 409.2, found 409.2. |

|                                              |                                                                                                                                                                                                                                                                                        |                                                                                                                                                                                                                                                                                                                                                   |
|----------------------------------------------|----------------------------------------------------------------------------------------------------------------------------------------------------------------------------------------------------------------------------------------------------------------------------------------|---------------------------------------------------------------------------------------------------------------------------------------------------------------------------------------------------------------------------------------------------------------------------------------------------------------------------------------------------|
| <p style="text-align: center;"><b>18</b></p> | 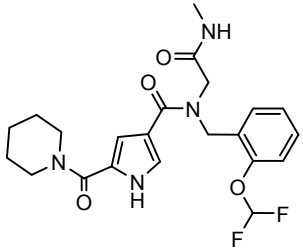 <p style="text-align: center;">2-(<i>N</i>-[[2-(difluoromethoxy)phenyl]methyl]-1-[5-[(piperidin-1-yl)carbonyl]-1<i>H</i>-pyrrol-3-yl]formamido)-<i>N</i>-methylacetamide</p>                         | <p>Yield 21%, <sup>1</sup>HNMR (300 MHz, DMSO-<i>d</i><sub>6</sub>) δ 11.84 (s, 1H), 8.06 (s, 1H), 7.68 – 6.81 (m, 6H), 6.60 (s, 1H), 4.72 (d, 2H), 4.03 (s, 2H), 3.56 (d, 4H), 2.62 (d, 3H), 1.95 – 1.07 (m, 6H). LRMS (ESI) calcd. C<sub>22</sub>H<sub>26</sub>F<sub>2</sub>N<sub>4</sub>O<sub>4</sub> (M+H)<sup>+</sup> 449.2, found 449.2</p> |
| <p style="text-align: center;"><b>19</b></p> |  <p style="text-align: center;"><i>N</i><sup>4</sup>-(2-(difluoromethoxy)benzyl)-<i>N</i><sup>2</sup>-ethyl-<i>N</i><sup>4</sup>-(2-(methylamino)-2-oxoethyl)-1<i>H</i>-pyrrole-2,4-dicarboxamide</p> | <p>Yield 20%, <sup>1</sup>HNMR (400 MHz, DMSO-<i>d</i><sub>6</sub>) δ 11.81 (s, 1H), 8.18 (s, 2H), 7.51 – 7.17 (m, 5H), 7.02 (d, 2H), 4.62 (s, 2H), 4.03 (s, 2H), 3.23 (s, 2H), 2.62 (s, 3H), 1.09 (t, 3H). LRMS (ESI) calcd. C<sub>19</sub>H<sub>22</sub>F<sub>2</sub>N<sub>4</sub>O<sub>4</sub> (M+H)<sup>+</sup> 409.2, found 409.2.</p>       |

**Representative example 2: Synthesis of (*N*-(2-(difluoromethoxy)benzyl)-*N*-(2-(isopropylamino)-2-oxoethyl)-5-(pyrrolidine-1-carbonyl)-1*H*-pyrrole-3-carboxamide (compound 10).**

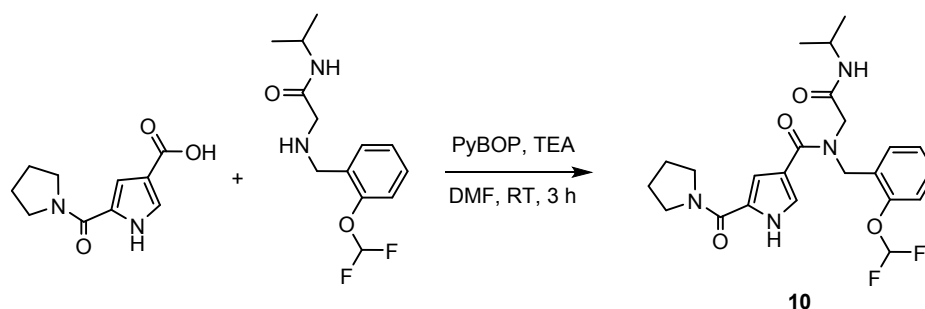

Under nitrogen atmosphere, 5-(pyrrolidine-1-carbonyl)-1*H*-pyrrole-3-carboxylic acid (47 mg, 0.23 mmol), triethylamine (45 mg, 0.5 mmol) and PyBOP (115 mg, 0.2 mmol) were dissolved in *N,N*-dimethylformamide (2 mL) and the mixture was stirred at room temperature for 30 minutes. Next, 2-(2-(difluoromethoxy)benzylamino)-*N*-isopropylacetamide (41 mg, 0.2 mmol) was added and the mixture was stirred for 2.5 hours. The mixture was concentrated, the residue was purified by reversed phase chromatography (method A) and lyophilized to afford *N*-(2-(difluoromethoxy)benzyl)-*N*-(2-(isopropylamino)-2-oxoethyl)-5-(pyrrolidine-1-carbonyl)-1*H*-

pyrrole-3-carboxamide (**compound 10**, 13 mg, 20%) as a white solid. <sup>1</sup>HNMR (300 MHz, DMSO-d<sub>6</sub>) δ 11.83 (s, 1H), 7.92 – 7.63 (m, 1H), 7.46 – 6.97 (m, 6H), 6.80 (d, 1H), 4.78 – 4.61 (m, 2H), 3.96 – 3.45 (m, 7H), 1.82 – 1.73 (m, 4H), 1.03 (d, 6H). LRMS (ESI) calcd. C<sub>23</sub>H<sub>28</sub>F<sub>2</sub>N<sub>4</sub>O<sub>4</sub> (M+H)<sup>+</sup> 463.2, found 463.2.

The following compounds were prepared using procedures analogous to representative Example 2.

| Compound # | Structure and compound name                                                                                                                                                                                             | Analytical data                                                                                                                                                                                                                                                                                                                           |
|------------|-------------------------------------------------------------------------------------------------------------------------------------------------------------------------------------------------------------------------|-------------------------------------------------------------------------------------------------------------------------------------------------------------------------------------------------------------------------------------------------------------------------------------------------------------------------------------------|
| 9          | 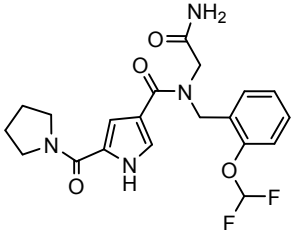 <p><i>N</i>-(2-amino-2-oxoethyl)-<i>N</i>-(2-(difluoromethoxy)benzyl)-5-(pyrrolidine-1-carbonyl)-1<i>H</i>-pyrrole-3-carboxamide</p>  | Yield 14%, <sup>1</sup> HNMR (300 MHz, DMSO-d <sub>6</sub> ) δ 11.88 (s, 1H), 7.47 – 6.98 (m, 8H), 6.82 (d, 1H), 4.79 (d, 2H), 3.99 – 3.38 (m, 6H), 1.91 (d, 4H). LCMS (ESI) calcd. C <sub>20</sub> H <sub>22</sub> F <sub>2</sub> N <sub>4</sub> O <sub>4</sub> (M+H) <sup>+</sup> 421.2, found 421.2.                                   |
| 11         |  <p><i>N</i>-(2-(difluoromethoxy)benzyl)-<i>N</i>-(oxazol-2-ylmethyl)-5-(pyrrolidine-1-carbonyl)-1<i>H</i>-pyrrole-3-carboxamide</p> | Yield 4%, <sup>1</sup> HNMR (300 MHz, DMSO-d <sub>6</sub> ) complex mixture of rotamers δ 11.89 (s, 1H), 8.07 (s, 1H), 7.47 – 6.97 (m, 7H), 6.75 (s, 1H), 4.77 (s, 4H), 3.44 (t, 4H), 1.80 (d, 4H). LRMS (ESI) calcd. C <sub>22</sub> H <sub>22</sub> F <sub>2</sub> N <sub>4</sub> O <sub>4</sub> (M+H) <sup>+</sup> 445.2, found 445.2. |
| 12         |  <p><i>N</i>-(2-(difluoromethoxy)benzyl)-<i>N</i>-methyl-5-(pyrrolidine-1-carbonyl)-1<i>H</i>-pyrrole-3-carboxamide</p>              | Yield 7%, <sup>1</sup> HNMR (300 MHz, DMSO-d <sub>6</sub> ) δ 11.84 (s, 1H), 7.47 – 7.06 (m, 6H), 6.79 (s, 1H), 4.70 (s, 2H), 3.59 – 3.46 (m, 4H), 3.07 (s, 3H), 1.80 (d, 4H). LRMS (ESI) calcd. C <sub>19</sub> H <sub>21</sub> F <sub>2</sub> N <sub>3</sub> O <sub>3</sub> (M+H) <sup>+</sup> 378.1, found 378.1.                      |

|                  |                                                                                                                                                                                                                                     |                                                                                                                                                                                                                                                                                                                                                    |
|------------------|-------------------------------------------------------------------------------------------------------------------------------------------------------------------------------------------------------------------------------------|----------------------------------------------------------------------------------------------------------------------------------------------------------------------------------------------------------------------------------------------------------------------------------------------------------------------------------------------------|
| <p><b>13</b></p> | 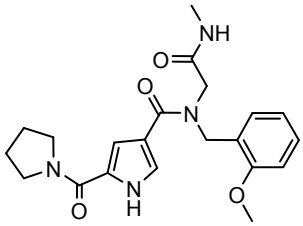 <p>N-(2-methoxybenzyl)-N-(2-(methylamino)-2-oxoethyl)-5-(pyrrolidine-1-carbonyl)-1H-pyrrole-3-carboxamide</p>                                     | <p>Yield 5%, <sup>1</sup>HNMR (300 MHz, DMSO-d<sub>6</sub>) δ 11.78 (s, 1H), 7.82 (d, 1H), 7.23 – 6.53 (m, 6H), 4.71 (s, 1H), 4.53 (s, 1H), 3.96 – 3.60 (m, 6H), 3.42 (s, 2H), 3.26 (s, 1H), 2.67 (d, 3H), 1.85 – 1.77 (m, 4H). LRMS (ESI) calcd. C<sub>21</sub>H<sub>26</sub>N<sub>4</sub>O<sub>4</sub> (M+H)<sup>+</sup> 399.2, found 399.2.</p> |
| <p><b>14</b></p> |  <p>N-(2-ethoxybenzyl)-N-(2-(methylamino)-2-oxoethyl)-5-(pyrrolidine-1-carbonyl)-1H-pyrrole-3-carboxamide</p>                                      | <p>Yield 9%, <sup>1</sup>HNMR (300 MHz, DMSO-d<sub>6</sub>) δ 11.82 (s, 1H), 7.85 (s, 1H), 7.64 – 6.85 (m, 5H), 6.56 (s, 1H), 4.65 (d, 2H), 4.22 – 3.88 (m, 4H), 3.55 (d, 4H), 2.63 (s, 3H), 1.82 (s, 4H), 1.33 (s, 3H). LRMS (ESI) calcd. C<sub>22</sub>H<sub>28</sub>N<sub>4</sub>O<sub>4</sub> (M+H)<sup>+</sup> 413.2, found 413.2.</p>        |
| <p><b>15</b></p> |  <p>N-((3,4-dihydro-2H-benzo[b][1,4]dioxepin-6-yl)methyl)-N-(2-(methylamino)-2-oxoethyl)-5-(pyrrolidine-1-carbonyl)-1H-pyrrole-3-carboxamide</p> | <p>Yield 8%, <sup>1</sup>HNMR (300 MHz, DMSO-d<sub>6</sub>) δ 11.79 (s, 1H), 7.83 (d, 1H), 7.13 – 6.58 (m, 5H), 4.74 – 4.56 (d, 2H), 4.11 – 3.76 (m, 6H), 3.61 – 3.43 (m, 4H), 2.61 (s, 3H), 2.09 (t, 2H), 1.79 (d, 4H). LRMS (ESI) calcd. C<sub>23</sub>H<sub>28</sub>N<sub>4</sub>O<sub>5</sub> (M+H)<sup>+</sup> 441.2, found 441.2.</p>        |
| <p><b>16</b></p> |                                                                                                                                                  | <p>Yield 6%, <sup>1</sup>HNMR (300 MHz, DMSO-d<sub>6</sub>) δ 11.75 (s, 1H), 11.27 (s, 1H), 7.89 (d, 1H), 7.36 (d, 2H), 7.09 (s, 2H), 6.82 (d, 1H), 6.46 (d, 2H), 4.98 (d, 2H),</p>                                                                                                                                                                |

|  |                                                                                                                                                 |                                                                                                                                                                                                               |
|--|-------------------------------------------------------------------------------------------------------------------------------------------------|---------------------------------------------------------------------------------------------------------------------------------------------------------------------------------------------------------------|
|  | <i>N</i> -((1 <i>H</i> -indol-4-yl)methyl)- <i>N</i> -(2-(methylamino)-2-oxoethyl)-5-(pyrrolidine-1-carbonyl)-1 <i>H</i> -pyrrole-3-carboxamide | 4.00 (s, 2H), 3.66 (s, 2H), 3.46 (s, 1H), 2.92 (d, 1H), 2.63 (d, 3H), 1.40 (s, 4H).<br>LRMS (ESI) calcd. C <sub>22</sub> H <sub>25</sub> N <sub>5</sub> O <sub>3</sub> (M+H) <sup>+</sup> 408.2, found 408.2. |
|--|-------------------------------------------------------------------------------------------------------------------------------------------------|---------------------------------------------------------------------------------------------------------------------------------------------------------------------------------------------------------------|

**Representative example 3: Synthesis of *N*-(2-(difluoromethoxy)benzyl)-*N*-(2-(methylamino)-2-oxoethyl)-2-(pyrrolidine-1-carbonyl)-1*H*-imidazole-4-carboxamide (compound 20).**

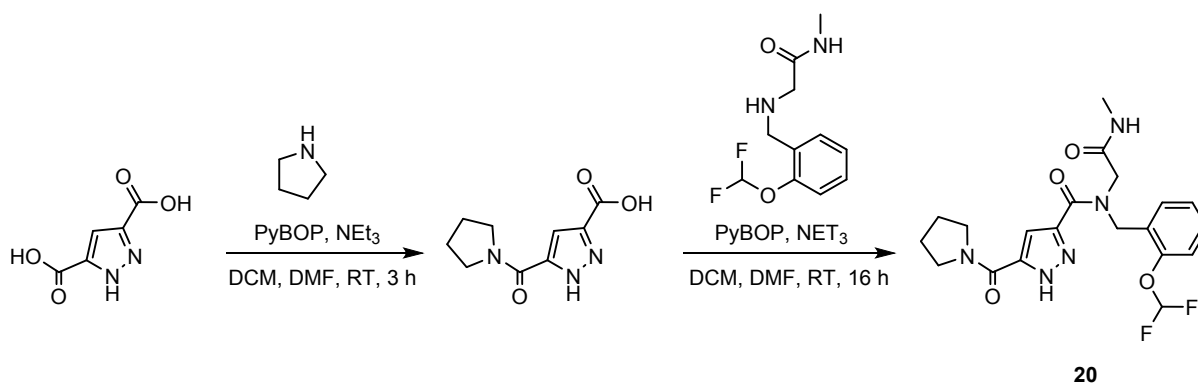

To a solution of 1*H*-pyrazole-3,5-dicarboxylic acid (1 g, 6.4 mmol) in a mixture of dichloromethane (6 mL) and *N,N*-dimethylformamide (6 mL) was added PyBOP (3.33 g, 6.4 mmol) and triethylamine (647 mg, 6.4 mmol). The mixture was stirred for 15 minutes, pyrrolidine (455 mg, 6.4 mmol) was added and the mixture was stirred at room temperature for 3 hours. The mixture was partitioned between ethyl acetate and water and the layers were separated. The aqueous layer was extracted with ethyl acetate twice. The combined organic layers were washed with brine, dried with sodium sulfate and concentrated. The crude product was purified by reversed phase chromatography (method A) and lyophilized to afford 5-(pyrrolidine-1-carbonyl)-1*H*-pyrazole-3-carboxylic acid (683 mg, 51%) as a white solid. LRMS (ESI) calcd. C<sub>9</sub>H<sub>11</sub>N<sub>3</sub>O<sub>3</sub> (M+H)<sup>+</sup> 209.1, found 209.1. To a solution of 5-(pyrrolidine-1-carbonyl)-1*H*-pyrazole-3-carboxylic acid (51 mg, 0.2 mmol) in a mixture of dichloromethane (1 mL) and *N,N*-dimethylformamide (1 mL) was added PyBOP (128 mg, 0.2 mmol) and triethylamine (62 mg, 0.6 mmol). The mixture was stirred for 15 minutes, 2-(2-(difluoromethoxy)benzylamino)-*N*-methylacetamide (50 mg, 0.20 mmol) was added and the mixture was stirred at room temperature for 16 hours. The mixture was partitioned between ethyl acetate and water and the layers were separated. The aqueous layer was extracted with ethyl acetate twice. The combined organic layers were washed with brine, dried with sodium sulfate and concentrated. The crude product was purified by reversed phase chromatography (method A) and lyophilized to afford *N*-(2-(difluoromethoxy)benzyl)-*N*-(2-(methylamino)-2-oxoethyl)-5-(pyrrolidine-1-carbonyl)-1*H*-pyrazole-3-carboxamide (compound **20**, 7.3 mg, 8%) as a white solid. <sup>1</sup>HNMR (300 MHz, DMSO-*d*<sub>6</sub>) δ 11.39 (s, 1H), 7.34 (d, 2H), 7.20 (dd, 3H), 7.02 – 6.16 (m, 2H), 5.31 (s, 1H), 4.91 (s, 1H), 4.47 (d, 1H), 4.11 (s, 1H), 3.80 (s, 2H), 3.71 (d, 2H), 2.79 (s, 3H), 2.20 – 2.03 (m, 2H), 2.03 – 1.92 (m, 2H). LRMS (ESI) calcd. C<sub>20</sub>H<sub>23</sub>F<sub>2</sub>N<sub>5</sub>O<sub>4</sub> (M+H)<sup>+</sup> 436.2, found 436.2.

**Representative example 4: Synthesis of *N*-(2-(difluoromethoxy)benzyl)-1-methyl-*N*-(2-(methylamino)-2-oxoethyl)-5-(pyrrolidine-1-carbonyl)-1*H*-pyrrole-3-carboxamide (compound 21).**

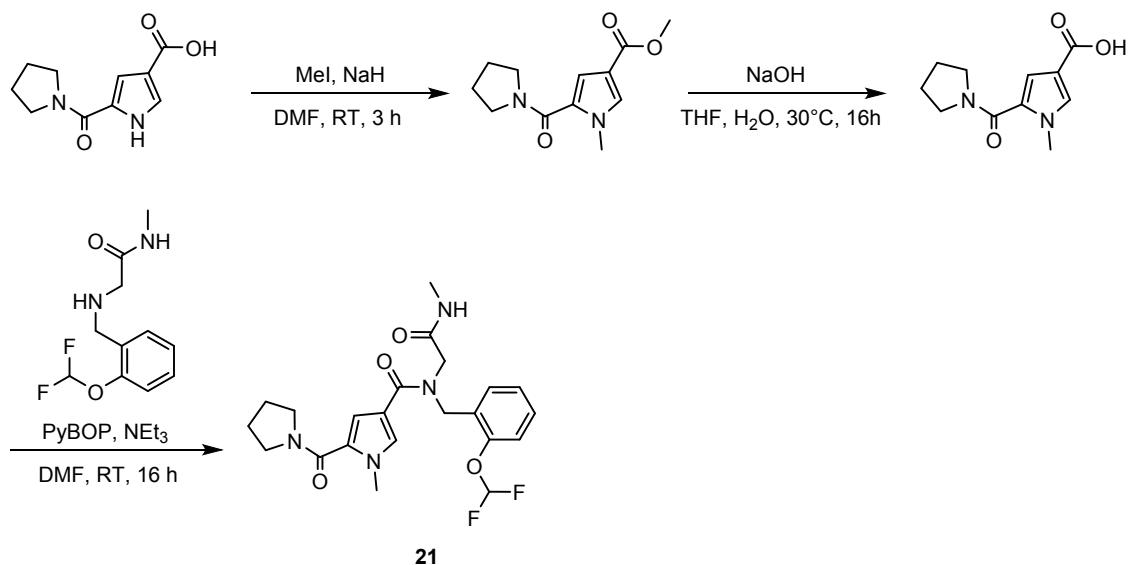

To a solution of 5-(pyrrolidine-1-carbonyl)-1*H*-pyrrole-3-carboxylic acid (200 mg, 0.9 mmol) in *N,N*-dimethylformamide (5 mL) was added sodium hydride (163 mg, 4.0 mmol), followed by iodomethane (579 mg, 4.0 mmol) and the mixture stirred at room temperature for 3 hours. The mixture was quenched with water and extracted with ethyl acetate. The combined organic layers were dried with sodium sulfate and concentrated to afford methyl 1-methyl-5-(pyrrolidine-1-carbonyl)-1*H*-pyrrole-3-carboxylate (258 mg, 92%) as a white solid. LRMS (ESI) calcd. C<sub>12</sub>H<sub>16</sub>N<sub>2</sub>O<sub>3</sub> (M+H)<sup>+</sup> 237.1, found 237.1. To a solution of methyl 1-methyl-5-(pyrrolidine-1-carbonyl)-1*H*-pyrrole-3-carboxylate (258 mg, 1.1 mmol) in a mixture of tetrahydrofuran (3.6 mL) and water (0.4 mL) was added sodium hydroxide (88 mg, 2.2 mmol) and the mixture was stirred at 30 °C for 16 hours. The mixture was concentrated, redissolved in water and acidified with 1M hydrochloric acid solution until pH 4-5 at 0 °C. The precipitate was filtered off to afford 1-methyl-5-(pyrrolidine-1-carbonyl)-1*H*-pyrrole-3-carboxylic acid (206 mg, 85%) as a white solid. LRMS (ESI) calcd. C<sub>11</sub>H<sub>14</sub>N<sub>2</sub>O<sub>3</sub> (M+H)<sup>+</sup> 223.1, found 223.1. To a solution of 1-methyl-5-(pyrrolidine-1-carbonyl)-1*H*-pyrrole-3-carboxylic acid (91 mg, 0.4 mmol) in *N,N*-dimethylformamide (5 mL) was added PyBOP (255 mg, 0.5 mmol) followed by triethylamine (124 mg, 1.2 mmol) and the mixture was stirred for 15 minutes. Next, 2-(2-(difluoromethoxy)benzylamino)-*N*-methylacetamide (100 mg, 0.7 mmol) was added and the mixture was stirred at room temperature for 16 hours. The mixture was partitioned between ethyl acetate and water and the layers were separated. The aqueous layer was extracted with ethyl acetate twice. The combined organic layers were washed with brine, dried with sodium sulfate and concentrated to afford the crude product that was purified by reversed phase chromatography (method A) and lyophilized to afford *N*-(2-(difluoromethoxy)benzyl)-1-methyl-*N*-(2-(methylamino)-2-oxoethyl)-5-(pyrrolidine-1-carbonyl)-1*H*-pyrrole-3-carboxamide (compound 21, 28 mg, 15%) as a white solid. <sup>1</sup>HNMR (300 MHz, DMSO-*d*<sub>6</sub>) δ 7.93 (d, 1H), 7.51 – 6.94 (m, 6H), 6.81 – 6.29 (m, 1H), 4.71 (d, 2H), 4.03 (s, 2H), 3.74 (s, 3H), 3.33 (s, 4H), 2.62 (d, 3H), 1.83 (s, 4H). LRMS (ESI) calcd. C<sub>22</sub>H<sub>26</sub>F<sub>2</sub>N<sub>4</sub>O<sub>4</sub> (M+H)<sup>+</sup> 449.2, found 449.2.



## Synthesis of 2,4-1*H*-imidazole carboxamides:

### Representative example 5 (route A): Synthesis of *N*-(2-(difluoromethoxy)benzyl)-*N*-(2-(methylamino)-2-oxoethyl)-2-(pyrrolidine-1-carbonyl)-1*H*-imidazole-4-carboxamide (compound 22).

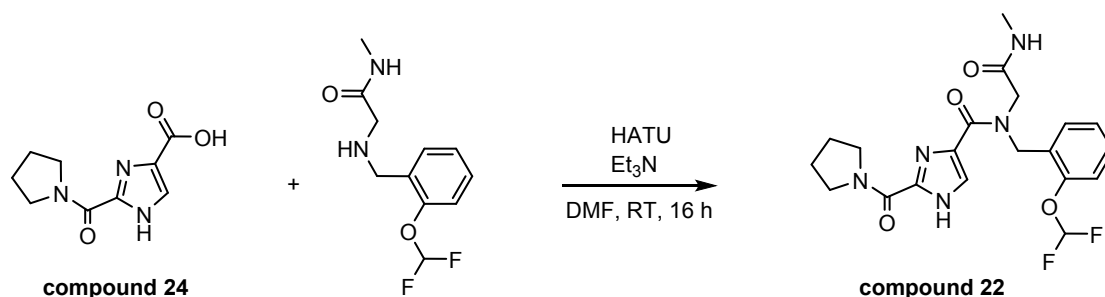

To a solution of 2-(pyrrolidine-1-carbonyl)-1*H*-imidazole-5-carboxylic acid (50 mg, 0.24 mmol) in *N,N*-dimethylformamide (3 mL), HATU (81 mg, 0.29 mmol) and triethylamine (50  $\mu$ L, 0.36 mmol) were added. After 30 minutes 2-((2-(difluoromethoxy)benzyl)amino)-*N*-methylacetamide (71 mg, 0.29 mmol) was added and the reaction mixture was stirred at room temperature for 16 hours. The reaction mixture was purified by reversed phase chromatography (method A) and the appropriate fractions were lyophilized to afford *N*-(2-(difluoromethoxy)benzyl)-*N*-(2-(methylamino)-2-oxoethyl)-2-(pyrrolidine-1-carbonyl)-1*H*-imidazole-4-carboxamide (compound 22, 70 mg, 67%) as a white solid. <sup>1</sup>HNMR (400 MHz, DMSO-*d*<sub>6</sub>) complex mixture of rotamers  $\delta$  13.35 (s, 1H), 7.93 – 7.82 (m, 1H), 7.74 (s, 1H), 7.44 – 7.01 (m, 5H), 5.25 (s, 1H), 4.62 (s, 1H), 4.56 (s, 1H), 3.95 – 3.84 (m, 2H), 3.50 (t, *J* = 6.7 Hz, 1H), 3.39 (t, *J* = 6.7 Hz, 1H), 3.27 (t, *J* = 6.6 Hz, 1H), 2.64 – 2.55 (m, 3H), 1.89 (q, *J* = 6.5 Hz, 1H), 1.82 (q, *J* = 6.5 Hz, 1H), 1.66 (q, *J* = 6.5 Hz, 1H), 1.59 (q, *J* = 6.5 Hz, 1H). LCMS (Method B): *t*<sub>R</sub> 2.87 min, 100%, LRMS (ESI) calcd. C<sub>20</sub>H<sub>23</sub>F<sub>2</sub>N<sub>5</sub>O<sub>4</sub> (M+H)<sup>+</sup> 436.4, found 436.2.

The following compounds were prepared using procedures analogous to representative example 5.

| Compound # | Structure and compound name                                                                                                                         | Analytical data                                                                                                                                                                                                                                                                                                                                                          |
|------------|-----------------------------------------------------------------------------------------------------------------------------------------------------|--------------------------------------------------------------------------------------------------------------------------------------------------------------------------------------------------------------------------------------------------------------------------------------------------------------------------------------------------------------------------|
| 38         | <p><i>N</i>-(2-(difluoromethoxy)benzyl)-<i>N</i>-(1-(methylamino)-1-oxobutan-2-yl)-2-(pyrrolidine-1-carbonyl)-1<i>H</i>-imidazole-4-carboxamide</p> | Yield: 20%, <sup>1</sup> HNMR (400 MHz, DMSO- <i>d</i> <sub>6</sub> ) complex mixture of rotamers $\delta$ 13.65 – 13.19 (m, 1H), 8.08 – 7.82 (m, 1H), 7.75 (s, 1H), 7.50 – 6.99 (m, 5H), 5.84 – 5.70 (m, 0.4H), 5.38 – 5.18 (m, 1H), 4.93 – 4.78 (m, 0.5H), 4.72 – 4.54 (m, 0.7H), 4.13 – 3.93 (m, 0.8H), 3.61 – 3.46 (m, 0.9H), 3.44 – 3.33 (m, 1.1H), 3.25 – 3.05 (m, |

|    |                                                                                                                                                                                                                                                     |                                                                                                                                                                                                                                                                                                                                                                                                                                                                                                                                                                                                                                                   |
|----|-----------------------------------------------------------------------------------------------------------------------------------------------------------------------------------------------------------------------------------------------------|---------------------------------------------------------------------------------------------------------------------------------------------------------------------------------------------------------------------------------------------------------------------------------------------------------------------------------------------------------------------------------------------------------------------------------------------------------------------------------------------------------------------------------------------------------------------------------------------------------------------------------------------------|
|    |                                                                                                                                                                                                                                                     | 1H), 2.48 – 2.34 (m, 3H), 2.01 – 1.42 (m, 6H), 0.90 – 0.67 (m, 3H). LCMS (Method B): $t_R$ 3.03 min, LRMS (ESI) calcd. $C_{22}H_{27}F_2N_5O_4$ (M+H) <sup>+</sup> 464.2, found 464.2.                                                                                                                                                                                                                                                                                                                                                                                                                                                             |
| 40 | 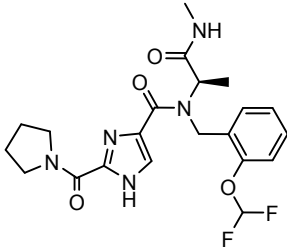 <p>(<i>R</i>)-<i>N</i>-(2-(difluoromethoxy)benzyl)-<i>N</i>-(1-(methylamino)-1-oxopropan-2-yl)-2-(pyrrolidine-1-carbonyl)-1<i>H</i>-imidazole-4-carboxamide</p>  | Yield: 74%, <sup>1</sup> HNMR (400 MHz, DMSO- <i>d</i> <sub>6</sub> ) complex mixture of rotamers $\delta$ 13.57 – 13.15 (m, 1H), 7.94 – 7.79 (m, 1H), 7.74 (s, 1H), 7.46 – 7.03 (m, 5H), 5.97 (d, <i>J</i> = 6.3 Hz, 0.3H), 5.49 (d, <i>J</i> = 18.1 Hz, 0.6H), 5.09 – 4.76 (m, 1.5H), 4.36 – 4.19 (m, 0.3H), 4.11 – 3.89 (m, 0.7H), 3.60 – 3.47 (m, 0.7H), 3.42 – 3.34 (m, 1.7H), 3.23 – 3.12 (m, 0.6H), 3.06 – 2.94 (m, 0.6H), 2.56 – 2.51 (m, 3H), 2.01 – 1.76 (m, 1.5H), 1.72 – 1.47 (m, 2.5H), 1.36 – 1.09 (m, 3H). LCMS (Method B): $t_R$ 2.91 min, 100%, LRMS (ESI) calcd. $C_{21}H_{25}F_2N_5O_4$ (M+H) <sup>+</sup> 450.2, found 450.2. |
| 41 |  <p>(<i>S</i>)-<i>N</i>-(2-(difluoromethoxy)benzyl)-<i>N</i>-(1-(methylamino)-1-oxopropan-2-yl)-2-(pyrrolidine-1-carbonyl)-1<i>H</i>-imidazole-4-carboxamide</p> | Yield 47%, <sup>1</sup> HNMR (400 MHz, DMSO- <i>d</i> <sub>6</sub> ) complex mixture of rotamers $\delta$ 13.57 – 13.15 (m, 1H), 7.94 – 7.79 (m, 1H), 7.74 (s, 1H), 7.46 – 7.03 (m, 5H), 5.97 (d, <i>J</i> = 6.3 Hz, 0.3H), 5.49 (d, <i>J</i> = 18.1 Hz, 0.6H), 5.09 –                                                                                                                                                                                                                                                                                                                                                                            |

|  |                                                              |                                                                                                                                                                                                                                                                                                                                                                             |
|--|--------------------------------------------------------------|-----------------------------------------------------------------------------------------------------------------------------------------------------------------------------------------------------------------------------------------------------------------------------------------------------------------------------------------------------------------------------|
|  | (pyrrolidine-1-carbonyl)-1 <i>H</i> -imidazole-4-carboxamide | 4.76 (m, 1.5H), 4.36 – 4.19 (m, 0.3H), 4.11 – 3.89 (m, 0.7H), 3.60 – 3.47 (m, 0.7H), 3.42 – 3.34 (m, 1.7H), 3.23 – 3.12 (m, 0.6H), 3.06 – 2.94 (m, 0.6H), 2.56 – 2.51 (m, 3H), 2.01 – 1.76 (m, 1.5H), 1.72 – 1.47 (m, 2.5H), 1.36 – 1.09 (m, 3H).<br>LCMS (Method B): $t_R$ 2.92 min, 100%, LRMS (ESI) calcd. $C_{21}H_{25}F_2N_5O_4$ (M+H) <sup>+</sup> 450.2, found 450.2 |
|--|--------------------------------------------------------------|-----------------------------------------------------------------------------------------------------------------------------------------------------------------------------------------------------------------------------------------------------------------------------------------------------------------------------------------------------------------------------|

**Representative example 6 (route A): synthesis of *N*-(1-(2-(difluoromethoxy)phenyl)ethyl)-*N*-(2-(methylamino)-2-oxoethyl)-2-(pyrrolidine-1-carbonyl)-1*H*-imidazole-4-carboxamide (compound 28).**

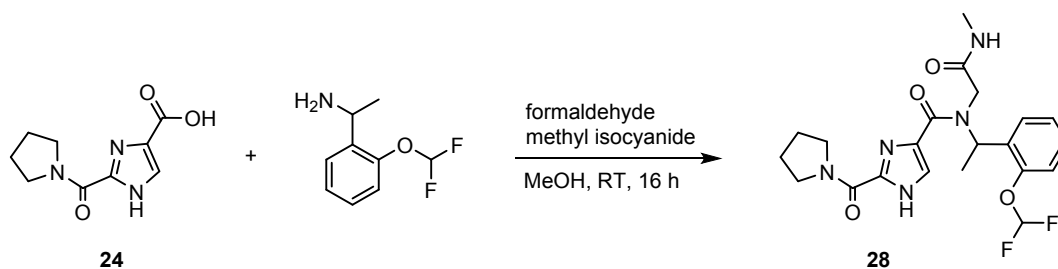

To a solution of 1-[2-(difluoromethoxy)phenyl]ethanamine (23.4 mg, 0.125 mmol) and formaldehyde (9.4  $\mu$ L, 0.125 mmol, 37%) in methanol (1 mL), 2-(pyrrolidine-1-carbonyl)-1*H*-imidazole-4-carboxylic acid (25 mg, 0.12 mmol) and methyl isocyanide (14  $\mu$ L, 0.24 mmol) were added and the mixture was stirred at room temperature for 16 hours. The reaction mixture was purified by reversed phase chromatography (method A) and the appropriate fractions were lyophilized to afford *N*-(1-(2-(difluoromethoxy)phenyl)ethyl)-*N*-(2-(methylamino)-2-oxoethyl)-2-(pyrrolidine-1-carbonyl)-1*H*-imidazole-4-carboxamide (compound **28**, 25 mg, 44%) as a white solid. <sup>1</sup>HNMR (400 MHz, DMSO-*d*<sub>6</sub>) complex mixture of rotamers  $\delta$  13.30 (s, 1H), 7.72 – 6.95 (m, 7H), 6.95 – 6.73 (m, 0.5H), 6.04 – 5.78 (m, 0.4H), 5.08 – 4.83 (m, 0.4H), 4.25 – 4.07 (m, 0.4H), 4.07 – 3.66 (m, 2.9H), 3.61 – 3.40 (m, 2.4H), 3.11 (q,  $J$  = 13.9 Hz, 0.4H), 2.70 (s, 0.7H), 2.46 (d,  $J$  = 4.5 Hz, 3H), 1.96 – 1.74 (m, 3.5H), 1.74 – 1.57 (m, 1.3H), 1.53 – 1.30 (m, 1.4H), 1.25 (d,  $J$  = 6.5 Hz, 0.7H); LCMS (Method B):  $t_R$  2.90 min, 100%, LRMS (ESI) calcd.  $C_{21}H_{25}F_2N_5O_4$  (M+H)<sup>+</sup> 450.2, found 450.2.

The following compounds were prepared using procedures analogous to representative Example 6.

| Compound # | Structure and compound name | Analytical data |
|------------|-----------------------------|-----------------|
|------------|-----------------------------|-----------------|

|           |                                                                                                                                                                                                                                    |                                                                                                                                                                                                                                                                                                                                                                                                                                                                                                                                                                                                                                   |
|-----------|------------------------------------------------------------------------------------------------------------------------------------------------------------------------------------------------------------------------------------|-----------------------------------------------------------------------------------------------------------------------------------------------------------------------------------------------------------------------------------------------------------------------------------------------------------------------------------------------------------------------------------------------------------------------------------------------------------------------------------------------------------------------------------------------------------------------------------------------------------------------------------|
| <p>29</p> | 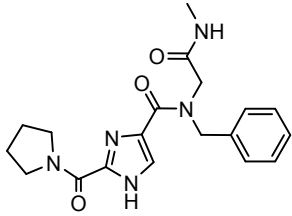 <p><i>N</i>-benzyl-<i>N</i>-(2-(methylamino)-2-oxoethyl)-2-(pyrrolidine-1-carbonyl)-1<i>H</i>-imidazole-4-carboxamide</p>                        | <p>Yield 53%, <sup>1</sup>HNMR (400 MHz, DMSO-d<sub>6</sub>) complex mixture of rotamers δ 13.38 (s, 1H), 7.93 – 7.79 (m, 1H), 7.75 (d, <i>J</i> = 5.3 Hz, 1H), 7.40 – 7.21 (m, 5H), 5.26 (s, 1H), 4.60 (s, 1H), 4.47 (s, 1H), 3.88 (t, <i>J</i> = 6.7 Hz, 1H), 3.83 (s, 1H), 3.49 (t, <i>J</i> = 6.7 Hz, 1H), 3.46 – 3.38 (m, 2H), 2.59 (d, <i>J</i> = 4.5 Hz, 3H), 1.96 – 1.75 (m, 2H), 1.74 – 1.54 (m, 2H).<br/>LCMS (Method B): <i>t</i><sub>R</sub> 2.73 min, 100%, LRMS (ESI) calcd. C<sub>19</sub>H<sub>23</sub>N<sub>5</sub>O<sub>3</sub> (M+H)<sup>+</sup> 370.2, found 370.2.</p>                                       |
| <p>30</p> |  <p><i>N</i>-(3-(difluoromethoxy)benzyl)-<i>N</i>-(2-(methylamino)-2-oxoethyl)-2-(pyrrolidine-1-carbonyl)-1<i>H</i>-imidazole-4-carboxamide</p> | <p>Yield 38%, <sup>1</sup>HNMR (400 MHz, DMSO-d<sub>6</sub>) complex mixture of rotamers δ 13.39 (s, 1H), 7.95 – 7.80 (m, 1H), 7.75 (d, <i>J</i> = 4.4 Hz, 1H), 7.42 – 7.37 (m, 1H), 7.21 (t, <i>J</i> = 60.2 Hz, 1H), 7.19 – 7.04 (m, 3H), 5.24 (s, 1H), 4.61 (s, 1H), 4.50 (s, 1H), 3.94 – 3.82 (m, 2H), 3.50 (t, <i>J</i> = 6.8 Hz, 1H), 3.45 – 3.37 (m, 2H), 2.59 (d, <i>J</i> = 4.4 Hz, 3H), 1.95 – 1.76 (m, 2H), 1.75 – 1.55 (m, 2H). LCMS (Method B): <i>t</i><sub>R</sub> 2.92 min, 100%, LRMS (ESI) calcd. C<sub>20</sub>H<sub>23</sub>F<sub>2</sub>N<sub>5</sub>O<sub>4</sub> (M+H)<sup>+</sup> 436.2, found 436.2.</p> |

|           |                                                                                                                                                                                                                                                             |                                                                                                                                                                                                                                                                                                                                                                                                                                                                                                                                            |
|-----------|-------------------------------------------------------------------------------------------------------------------------------------------------------------------------------------------------------------------------------------------------------------|--------------------------------------------------------------------------------------------------------------------------------------------------------------------------------------------------------------------------------------------------------------------------------------------------------------------------------------------------------------------------------------------------------------------------------------------------------------------------------------------------------------------------------------------|
| <p>31</p> | 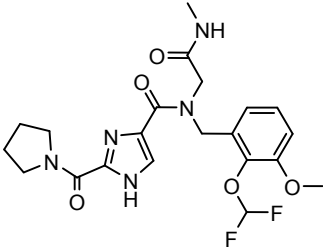 <p><i>N</i>-(2-(difluoromethoxy)-3-methoxybenzyl)-<br/><i>N</i>-(2-(methylamino)-2-oxoethyl)-2-<br/>(pyrrolidine-1-carbonyl)-1<i>H</i>-imidazole-4-<br/>carboxamide</p>   | <p>Yield 42%, <sup>1</sup>HNMR (400 MHz, DMSO-d<sub>6</sub>) complex mixture of rotamers δ 13.36 (s, 1H), 7.97 – 7.67 (m, 2H), 7.29 – 7.18 (m, 1H), 7.18 – 7.01 (m, 1.3H), 7.00 – 6.89 (m, 0.5H), 6.88 – 6.72 (m, 1.2H), 5.28 (s, 1H), 4.65 (s, 1H), 4.51 (s, 1H), 4.04 – 3.73 (m, 5H), 3.58 – 3.38 (m, 3H), 2.59 (s, 3H), 1.98 – 1.52 (m, 4H). (Method C): t<sub>R</sub> 2.95 min, 97%, LRMS (ESI) calcd. C<sub>21</sub>H<sub>25</sub>F<sub>2</sub>N<sub>5</sub>O<sub>5</sub> (M+H)<sup>+</sup> 466.2, found 466.2.</p>                   |
| <p>32</p> |  <p><i>N</i>-(2-(difluoromethoxy)-4-methoxybenzyl)-<br/><i>N</i>-(2-(methylamino)-2-oxoethyl)-2-<br/>(pyrrolidine-1-carbonyl)-1<i>H</i>-imidazole-4-<br/>carboxamide</p> | <p>Yield 64%, <sup>1</sup>HNMR (400 MHz, DMSO-d<sub>6</sub>) complex mixture of rotamers δ 13.36 (s, 1H), 7.91 – 7.80 (m, 1H), 7.72 (s, 1H), 7.45 – 7.01 (m, 2H), 6.87 – 6.73 (m, 2H), 5.17 (s, 1H), 4.64 – 4.44 (m, 2H), 3.93 – 3.82 (m, 2H), 3.76 (s, 3H), 3.50 (t, <i>J</i> = 6.7 Hz, 1H), 3.46 – 3.35 (m, 2H), 2.64 – 2.55 (m, 3H), 1.96 – 1.56 (m, 4H). LCMS (Method B): t<sub>R</sub> 2.83 min, 99%, LRMS (ESI) calcd. C<sub>21</sub>H<sub>25</sub>F<sub>2</sub>N<sub>5</sub>O<sub>5</sub> (M+H)<sup>+</sup> 466.2, found 466.2.</p> |

|           |                                                                                                                                                                                                                                             |                                                                                                                                                                                                                                                                                                                                                                                                                                                                                                                                                                                              |
|-----------|---------------------------------------------------------------------------------------------------------------------------------------------------------------------------------------------------------------------------------------------|----------------------------------------------------------------------------------------------------------------------------------------------------------------------------------------------------------------------------------------------------------------------------------------------------------------------------------------------------------------------------------------------------------------------------------------------------------------------------------------------------------------------------------------------------------------------------------------------|
| <p>33</p> | 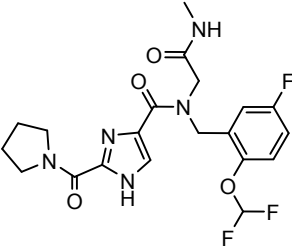 <p><i>N</i>-(2-(difluoromethoxy)-5-fluorobenzyl)-<i>N</i>-(2-(methylamino)-2-oxoethyl)-2-(pyrrolidine-1-carbonyl)-1<i>H</i>-imidazole-4-carboxamide</p>   | <p>Yield 32%, <sup>1</sup>HNMR (400 MHz, DMSO-d<sub>6</sub>) complex mixture of rotamers δ 13.38 (s, 1H), 7.97 – 7.83 (m, 1H), 7.75 (s, 1H), 7.37 – 6.92 (m, 4H), 5.25 (s, 1H), 4.62 (s, 2H), 4.01 – 3.84 (m, 2H), 3.50 (t, <i>J</i> = 6.7 Hz, 1H), 3.46 – 3.35 (m, 2H), 2.59 (s, 3H), 1.97 – 1.77 (m, 2H), 1.76 – 1.57 (m, 2H). LCMS (Method B): <i>t<sub>R</sub></i> 2.86 min, 100%, LRMS (ESI) calcd. C<sub>20</sub>H<sub>22</sub>F<sub>3</sub>N<sub>5</sub>O<sub>4</sub> (M+H)<sup>+</sup> 454.2, found 454.2.</p>                                                                       |
| <p>34</p> |  <p><i>N</i>-(5-chloro-2-(difluoromethoxy)benzyl)-<i>N</i>-(2-(methylamino)-2-oxoethyl)-2-(pyrrolidine-1-carbonyl)-1<i>H</i>-imidazole-4-carboxamide</p> | <p>Yield 52%, <sup>1</sup>HNMR (400 MHz, DMSO-d<sub>6</sub>) complex mixture of rotamers δ 13.40 (s, 1H), 8.02 – 7.81 (m, 1H), 7.75 (s, 1H), 7.48 – 7.03 (m, 4H), 5.16 (s, 1H), 4.71 – 4.50 (m, 2H), 3.97 – 3.83 (m, 2H), 3.50 (t, <i>J</i> = 6.7 Hz, 1H), 3.40 (t, <i>J</i> = 6.8 Hz, 1H), 3.29 – 3.23 (m, 1H), 2.65 – 2.55 (m, 3H), 1.97 – 1.86 (m, 1H), 1.86 – 1.77 (m, 1H), 1.74 – 1.56 (m, 2H). LCMS (Method B): <i>t<sub>R</sub></i> 3.01 min, 100%, LRMS (ESI) calcd. C<sub>20</sub>H<sub>22</sub>ClF<sub>2</sub>N<sub>5</sub>O<sub>4</sub> (M+H)<sup>+</sup> 470.2, found 470.2.</p> |

|                  |                                                                                                                                                                                                                                             |                                                                                                                                                                                                                                                                                                                                                                                                                                                                                                                                                         |
|------------------|---------------------------------------------------------------------------------------------------------------------------------------------------------------------------------------------------------------------------------------------|---------------------------------------------------------------------------------------------------------------------------------------------------------------------------------------------------------------------------------------------------------------------------------------------------------------------------------------------------------------------------------------------------------------------------------------------------------------------------------------------------------------------------------------------------------|
| <p><b>35</b></p> | 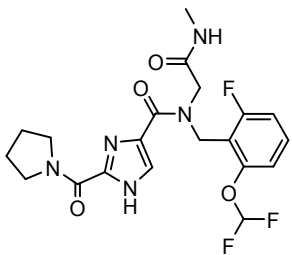 <p><i>N</i>-(2-(difluoromethoxy)-6-fluorobenzyl)-<i>N</i>-(2-(methylamino)-2-oxoethyl)-2-(pyrrolidine-1-carbonyl)-1<i>H</i>-imidazole-4-carboxamide</p>   | <p>Yield 58%, <sup>1</sup>HNMR (400 MHz, DMSO-d<sub>6</sub>) complex mixture of rotamers δ 13.32 (s, 1H), 7.82 – 7.63 (m, 2H), 7.46 – 7.37 (m, 1H), 7.25 – 6.96 (m, 3H), 5.60 (s, 0.4H), 4.87 – 4.45 (m, 2.8H), 4.04 – 3.68 (m, 2.7H), 3.48 (t, <i>J</i> = 6.7 Hz, 2H), 2.55 (d, <i>J</i> = 4.5 Hz, 3H), 1.95 – 1.69 (m, 4H). LCMS (Method B): <i>t<sub>R</sub></i> 2.83 min, 95%, LRMS (ESI) calcd. C<sub>20</sub>H<sub>22</sub>F<sub>3</sub>N<sub>5</sub>O<sub>4</sub> (M+H)<sup>+</sup> 454.2, found 454.2.</p>                                      |
| <p><b>36</b></p> |  <p><i>N</i>-(2-chloro-6-(difluoromethoxy)benzyl)-<i>N</i>-(2-(methylamino)-2-oxoethyl)-2-(pyrrolidine-1-carbonyl)-1<i>H</i>-imidazole-4-carboxamide</p> | <p>Yield 9%, <sup>1</sup>HNMR (400 MHz, DMSO-d<sub>6</sub>) complex mixture of rotamers δ 13.27 (s, 1H), 7.77 – 7.61 (m, 2H), 7.46 – 7.33 (m, 2.3H), 7.26 – 6.95 (m, 1.7H), 5.71 (s, 0.4H), 4.81 (s, 1.4H), 4.56 (s, 1.3H), 3.96 – 3.80 (m, 2H), 3.78 – 3.64 (m, 0.7H), 3.48 (t, <i>J</i> = 6.5 Hz, 2.6H), 2.53 (d, <i>J</i> = 4.6 Hz, 3H), 1.93 – 1.74 (m, 4H). LCMS (Method B): <i>t<sub>R</sub></i> 2.83 min, 95%, LRMS (ESI) calcd. C<sub>20</sub>H<sub>22</sub>ClF<sub>2</sub>N<sub>5</sub>O<sub>4</sub> (M+H)<sup>+</sup> 470.2, found 470.2.</p> |

|           |                                                                                                                                                                                                                                                   |                                                                                                                                                                                                                                                                                                                                                                                                                                                                                                                                                                                                                                                                                            |
|-----------|---------------------------------------------------------------------------------------------------------------------------------------------------------------------------------------------------------------------------------------------------|--------------------------------------------------------------------------------------------------------------------------------------------------------------------------------------------------------------------------------------------------------------------------------------------------------------------------------------------------------------------------------------------------------------------------------------------------------------------------------------------------------------------------------------------------------------------------------------------------------------------------------------------------------------------------------------------|
| <p>37</p> | 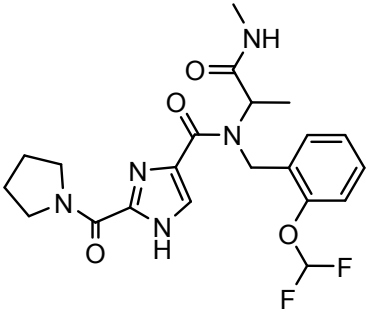 <p>(<i>R</i>)-<i>N</i>-(2-(difluoromethoxy)benzyl)-<i>N</i>-(1-(methylamino)-1-oxopropan-2-yl)-2-(pyrrolidine-1-carbonyl)-1<i>H</i>-imidazole-4-carboxamide</p> | <p>Yield 31%, <sup>1</sup>HNMR (400 MHz, DMSO-d<sub>6</sub>) complex mixture of rotamers δ 13.57 – 13.15 (m, 1H), 7.94 – 7.79 (m, 1H), 7.74 (s, 1H), 7.46 – 7.03 (m, 5H), 5.97 (d, <i>J</i> = 6.3 Hz, 0.3H), 5.49 (d, <i>J</i> = 18.1 Hz, 0.6H), 5.09 – 4.76 (m, 1.5H), 4.36 – 4.19 (m, 0.3H), 4.11 – 3.89 (m, 0.7H), 3.60 – 3.47 (m, 0.7H), 3.42 – 3.34 (m, 1.7H), 3.23 – 3.12 (m, 0.6H), 3.06 – 2.94 (m, 0.6H), 2.56 – 2.51 (m, 3H), 2.01 – 1.76 (m, 1.5H), 1.72 – 1.47 (m, 2.5H), 1.36 – 1.09 (m, 3H).<br/>LCMS (Method B): t<sub>R</sub> 2.91 min, 98%, LRMS (ESI) calcd. C<sub>21</sub>H<sub>25</sub>F<sub>2</sub>N<sub>5</sub>O<sub>4</sub> (M+H)<sup>+</sup> 450.2, found 450.2</p> |
| <p>39</p> |  <p><i>N</i>-(2-(difluoromethoxy)benzyl)-<i>N</i>-(3-methyl-1-(methylamino)-1-oxobutan-2-yl)-2-(pyrrolidine-1-carbonyl)-1<i>H</i>-imidazole-4-carboxamide</p>  | <p>Yield 58%, <sup>1</sup>HNMR (400 MHz, DMSO-d<sub>6</sub>) complex mixture of rotamers δ 13.34 (s, 1H), 8.13 – 7.80 (m, 1H), 7.74 (s, 1H), 7.45 – 6.95 (m, 5H), 5.88 – 5.61 (m, 1H), 4.99 – 4.83 (m, 1H), 4.78 (d, <i>J</i> = 17.7 Hz, 0.5H), 4.34 (d, <i>J</i> = 16.1 Hz, 0.5H), 4.19 – 4.08 (m, 0.5H), 4.06 – 3.93 (m, 0.5H), 3.55 (t, <i>J</i> = 6.6 Hz, 1H), 3.47 – 3.35 (m, 1.5H), 3.21 – 3.08 (m, 0.5H), 2.45 – 2.17 (m, 4H), 2.02 – 1.79 (m, 2H), 1.77 – 1.50 (m, 2H), 0.94 – 0.74 (m,</p>                                                                                                                                                                                        |



|  |  |                                                                                                                             |
|--|--|-----------------------------------------------------------------------------------------------------------------------------|
|  |  | 6H). LCMS (Method C): $t_R$ 3.34 min, 99%, LRMS (ESI) calcd. $C_{23}H_{29}F_2N_5O_4$ (M+H) <sup>+</sup> 478.2, found 478.2. |
|--|--|-----------------------------------------------------------------------------------------------------------------------------|

**Representative example 7 (route B): Synthesis of *N*-(2-(difluoromethoxy)benzyl)-*N*-(2-(methylamino)-2-oxoethyl)-2-(piperidine-1-carbonyl)-1*H*-imidazole-4-carboxamide (compound 43).**

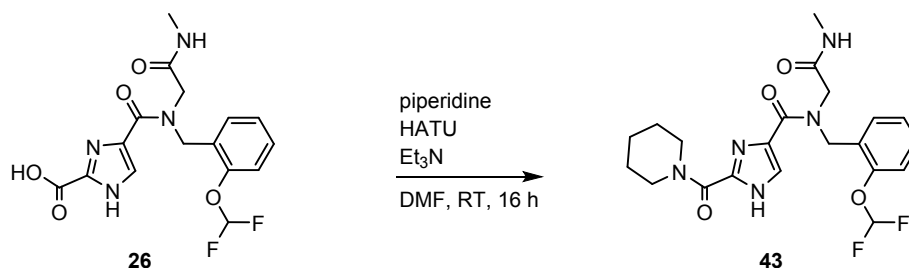

To a solution of 4-((2-(difluoromethoxy)benzyl)(2-(methylamino)-2-oxoethyl)carbamoyl)-1*H*-imidazole-2-carboxylic acid (25 mg, 0.065 mmol) in *N,N*-dimethylformamide (2 mL), HATU (25 mg, 0.065 mmol) and triethylamine (11  $\mu$ L, 0.078 mmol) were added. After 10 minutes piperidine (5.6 mg, 0.065 mmol) was added and the reaction mixture was stirred at room temperature for 16 hours. The reaction mixture was purified by reversed phase chromatography (method B) and the appropriate fractions were lyophilized to afford *N*-(2-(difluoromethoxy)benzyl)-*N*-(2-(methylamino)-2-oxoethyl)-2-(piperidine-1-carbonyl)-1*H*-imidazole-4-carboxamide (compound 43, 16 mg, 55%) as a white solid. <sup>1</sup>HNMR (400 MHz, DMSO-*d*<sub>6</sub>) complex mixture of rotamers  $\delta$  13.15 (s, 1H), 7.92 – 7.80 (m, 1H), 7.72 (s, 1H), 7.43 – 7.01 (m, 5H), 5.25 (s, 1H), 4.69 – 4.45 (m, 2H), 4.16 (s, 1H), 3.85 (s, 1H), 3.80 (s, 1H), 3.64 – 3.45 (m, 2H), 2.59 (d,  $J$  = 4.3 Hz, 3H), 1.73 – 1.58 (m, 1H), 1.57 – 1.37 (m, 4H), 1.13 – 0.99 (m, 1H). LCMS (Method C):  $t_R$  3.18 min, 100%, LRMS (ESI) calcd.  $C_{21}H_{25}F_2N_5O_4$  (M+H)<sup>+</sup> 450.2, found 450.2.

The following compounds were prepared using procedures analogous to representative Example 7.

| Compound # | Structure and compound name | Analytical data                                                                                                                                                                                                                     |
|------------|-----------------------------|-------------------------------------------------------------------------------------------------------------------------------------------------------------------------------------------------------------------------------------|
| 42         |                             | Yield 72%, <sup>1</sup> HNMR (400 MHz, DMSO- <i>d</i> <sub>6</sub> ) complex mixture of rotamers $\delta$ 13.49 (s, 1H), 7.92 – 7.80 (m, 1H), 7.74 (s, 1H), 7.44 – 7.01 (m, 5H), 5.31 (s, 1H), 4.61 (s, 2H), 4.48 (t, $J$ = 7.6 Hz, |

|    |                                                                                                                                                                                                                                            |                                                                                                                                                                                                                                                                                                                                                                                                                                                                                                                                |
|----|--------------------------------------------------------------------------------------------------------------------------------------------------------------------------------------------------------------------------------------------|--------------------------------------------------------------------------------------------------------------------------------------------------------------------------------------------------------------------------------------------------------------------------------------------------------------------------------------------------------------------------------------------------------------------------------------------------------------------------------------------------------------------------------|
|    | 2-(azetidine-1-carbonyl)- <i>N</i> -(2-(difluoromethoxy)benzyl)- <i>N</i> -(2-(methylamino)-2-oxoethyl)-1 <i>H</i> -imidazole-5-carboxamide                                                                                                | 1H), 4.06 (t, <i>J</i> = 7.6 Hz, 1H), 3.93 (dt, <i>J</i> = 14.9, 7.6 Hz, 2H), 3.86 (s, 1H), 2.64 – 2.55 (m, 3H), 2.36 – 2.22 (m, 1H), 2.13 – 2.01 (m, 1H). LCMS (Method B): <i>t<sub>R</sub></i> 2.76 min, 100%, LRMS (ESI) calcd. C <sub>19</sub> H <sub>21</sub> F <sub>2</sub> N <sub>5</sub> O <sub>4</sub> (M+H) <sup>+</sup> 422.2, found 422.2.                                                                                                                                                                         |
| 44 | 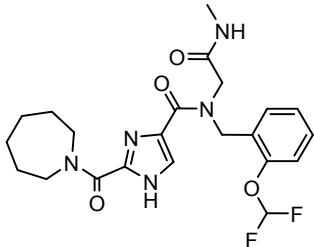 <p>2-(azepane-1-carbonyl)-<i>N</i>-(2-(difluoromethoxy)benzyl)-<i>N</i>-(2-(methylamino)-2-oxoethyl)-1<i>H</i>-imidazole-4-carboxamide</p>              | Yield 52%, <sup>1</sup> HNMR (400 MHz, DMSO- <i>d</i> <sub>6</sub> ) complex mixture of rotamers δ 13.32 (s, 1H), 7.96 – 7.66 (m, 2H), 7.43 – 6.93 (m, 5H), 5.30 (s, 1H), 4.60 (s, 2H), 4.14 – 4.01 (m, 1H), 3.84 (s, 1H), 3.78 – 3.67 (m, 1H), 3.63 – 3.54 (m, 1H), 3.53 – 3.42 (m, 1H), 2.65 – 2.54 (m, 3H), 1.78 – 1.16 (m, 8H). LCMS (Method C): <i>t<sub>R</sub></i> 3.51 min, 99%, LRMS (ESI) calcd. C <sub>22</sub> H <sub>27</sub> F <sub>2</sub> N <sub>5</sub> O <sub>4</sub> (M+H) <sup>+</sup> 464.2, found 464.2. |
| 45 |  <p><i>N</i>-(2-(difluoromethoxy)benzyl)-<i>N</i>-(2-(methylamino)-2-oxoethyl)-2-(2-methylpyrrolidine-1-carbonyl)-1<i>H</i>-imidazole-5-carboxamide</p> | Yield 52%, <sup>1</sup> HNMR (400 MHz, DMSO- <i>d</i> <sub>6</sub> ) complex mixture of rotamers δ 13.35 (s, 1H), 7.94 – 7.82 (m, 1H), 7.78 – 7.70 (m, 1H), 7.43 – 7.00 (m, 5H), 5.42 – 5.01 (m, 1.2H), 4.77 – 4.43 (m, 1.9H), 4.29 – 4.04 (m, 0.6H), 4.03 – 3.81 (m, 1.6H), 3.34 (s, 1.7H), 2.66 – 2.55 (m, 3H), 2.06 – 1.30 (m, 4H), 1.27 – 0.60 (m, 3H). LCMS (Method                                                                                                                                                       |

|    |                                                                                                                                                                                                                                            |                                                                                                                                                                                                                                                                                                                                                                                                                                                                                                                                                         |
|----|--------------------------------------------------------------------------------------------------------------------------------------------------------------------------------------------------------------------------------------------|---------------------------------------------------------------------------------------------------------------------------------------------------------------------------------------------------------------------------------------------------------------------------------------------------------------------------------------------------------------------------------------------------------------------------------------------------------------------------------------------------------------------------------------------------------|
|    |                                                                                                                                                                                                                                            | B): $t_R$ 3.00 min, 100%, LRMS (ESI) calcd. $C_{21}H_{25}F_2N_5O_4$ (M+H) <sup>+</sup> 450.2, found 450.2.                                                                                                                                                                                                                                                                                                                                                                                                                                              |
| 46 | 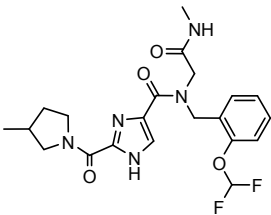 <p><i>N</i>-(2-(difluoromethoxy)benzyl)-<i>N</i>-(2-(methylamino)-2-oxoethyl)-2-(3-methylpyrrolidine-1-carbonyl)-1<i>H</i>-imidazole-5-carboxamide</p>   | Yield 54%, <sup>1</sup> HNMR (400 MHz, DMSO-d <sub>6</sub> ) complex mixture of rotamers $\delta$ 13.34 (s, 1H), 8.05 – 7.82 (m, 1H), 7.74 (s, 1H), 7.50 – 6.94 (m, 5H), 5.40 – 5.16 (m, 1H), 4.70 – 4.47 (m, 1.7H), 4.21 – 4.02 (m, 0.4H), 3.96 – 3.39 (m, 3.4H), 3.20 – 2.81 (m, 1.2H), 2.66 – 2.54 (m, 3H), 2.36 – 1.16 (m, 3.1H), 1.04 (d, $J$ = 6.5 Hz, 1.3H), 0.94 (d, $J$ = 6.6 Hz, 0.9H), 0.74 (d, $J$ = 6.6 Hz, 0.8H). LCMS (Method B): $t_R$ 3.00 min, 100%, LRMS (ESI) calcd. $C_{21}H_{25}F_2N_5O_4$ (M+H) <sup>+</sup> 450.2, found 450.2. |
| 47 |  <p><i>N</i>-(2-(difluoromethoxy)benzyl)-2-(3-fluoropyrrolidine-1-carbonyl)-<i>N</i>-(2-(methylamino)-2-oxoethyl)-1<i>H</i>-imidazole-5-carboxamide</p> | Yield 21%, <sup>1</sup> HNMR (400 MHz, DMSO-d <sub>6</sub> ) complex mixture of rotamers $\delta$ 13.48 (s, 1H), 7.98 – 7.72 (m, 2H), 7.44 – 7.01 (m, 5H), 5.51 – 4.85 (m, 2H), 4.74 – 4.20 (m, 2H), 4.01 – 3.12 (m, 5H), 2.65 – 2.55 (m, 3H), 2.29 – 1.74 (m, 2H). LCMS (Method B): $t_R$ 2.84 min, 100%, LRMS (ESI) calcd. $C_{20}H_{22}F_3N_5O_4$ (M+H) <sup>+</sup> 454.2, found 454.2.                                                                                                                                                             |

|    |                                                                                                                                                                                                                                                                           |                                                                                                                                                                                                                                                                                                                                                                                                                                                                                                                      |
|----|---------------------------------------------------------------------------------------------------------------------------------------------------------------------------------------------------------------------------------------------------------------------------|----------------------------------------------------------------------------------------------------------------------------------------------------------------------------------------------------------------------------------------------------------------------------------------------------------------------------------------------------------------------------------------------------------------------------------------------------------------------------------------------------------------------|
| 48 | 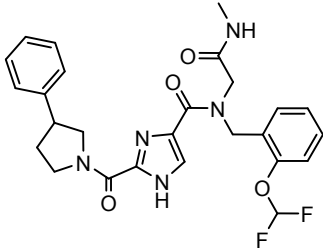 <p data-bbox="459 562 948 763"><i>N</i>-(2-(difluoromethoxy)benzyl)-<i>N</i>-(2-(methylamino)-2-oxoethyl)-2-(3-phenylpyrrolidine-1-carbonyl)-1<i>H</i>-imidazole-5-carboxamide</p>      | <p data-bbox="1023 197 1437 831">Yield 36%, <sup>1</sup>HNMR (400 MHz, DMSO-d<sub>6</sub>) complex mixture of rotamers δ 13.44 (s, 1H), 7.94 – 7.61 (m, 2H), 7.43 – 6.65 (m, 10H), 5.43 – 5.09 (m, 1H), 4.74 – 4.42 (m, 2H), 4.31 – 3.39 (m, 5H), 3.29 – 3.15 (m, 1H), 2.65 – 2.54 (m, 2.3H), 2.40 – 1.69 (m, 2.7H). LCMS (Method B): t<sub>R</sub> 3.29 min, 99%, LCMS (ESI) calcd. C<sub>26</sub>H<sub>27</sub>F<sub>2</sub>N<sub>5</sub>O<sub>4</sub> (M+H)<sup>+</sup> 512.2, found 512.2.</p>                   |
| 49 |  <p data-bbox="411 1256 991 1458"><i>N</i>-(2-(difluoromethoxy)benzyl)-2-(3-methoxypyrrolidine-1-carbonyl)-<i>N</i>-(2-(methylamino)-2-oxoethyl)-1<i>H</i>-imidazole-4-carboxamide</p> | <p data-bbox="1023 884 1437 1570">Yield 80%, <sup>1</sup>HNMR (400 MHz, DMSO-d<sub>6</sub>) complex mixture of rotamers δ 13.33 (s, 1H), 7.99 – 7.82 (m, 1H), 7.80 – 7.70 (m, 1H), 7.47 – 6.95 (m, 5H), 5.43 – 5.15 (m, 1H), 4.77 – 4.39 (m, 2H), 4.19 – 3.36 (m, 6H), 3.27 – 2.96 (m, 3H), 2.65 – 2.55 (m, 3H), 2.14 – 1.58 (m, 2H). LCMS (Method B): t<sub>R</sub> 2.80 min, 100%, LRMS (ESI) calcd. C<sub>21</sub>H<sub>25</sub>F<sub>2</sub>N<sub>5</sub>O<sub>5</sub> (M+H)<sup>+</sup> 466.2, found 466.2.</p> |
| 50 |  <p data-bbox="427 1921 975 2011">2-(3-acetamidopyrrolidine-1-carbonyl)-<i>N</i>-(2-(difluoromethoxy)benzyl)-<i>N</i>-(2-</p>                                                          | <p data-bbox="1023 1637 1437 1995">Yield 18%, <sup>1</sup>HNMR (400 MHz, DMSO-d<sub>6</sub>) complex mixture of rotamers δ 13.42 (s, 1H), 8.21 – 7.69 (m, 3H), 7.44 – 6.94 (m, 5H), 5.36 – 5.15 (m, 1H), 4.73 – 4.48 (m, 2H), 4.36 – 3.80 (m, 3H), 3.73 – 3.23 (m, 3H), 2.64</p>                                                                                                                                                                                                                                     |

|    |                                                                                                                                                                                                                                                      |                                                                                                                                                                                                                                                                                                                                                                                                                                                                      |
|----|------------------------------------------------------------------------------------------------------------------------------------------------------------------------------------------------------------------------------------------------------|----------------------------------------------------------------------------------------------------------------------------------------------------------------------------------------------------------------------------------------------------------------------------------------------------------------------------------------------------------------------------------------------------------------------------------------------------------------------|
|    | (methylamino)-2-oxoethyl)-1 <i>H</i> -imidazole-5-carboxamide                                                                                                                                                                                        | – 2.56 (m, 3H), 2.21 – 1.46 (m, 5H). (Method B): $t_R$ 2.54 min, 99%, LRMS (ESI) calcd. $C_{22}H_{26}F_2N_6O_5$ (M+H) <sup>+</sup> 493.2, found 493.2.                                                                                                                                                                                                                                                                                                               |
| 51 | 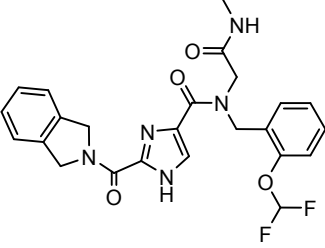 <p><i>N</i>-(2-(difluoromethoxy)benzyl)-2-(isoindoline-2-carbonyl)-<i>N</i>-(2-(methylamino)-2-oxoethyl)-1<i>H</i>-imidazole-5-carboxamide</p>                     | Yield 55%, <sup>1</sup> HNMR (400 MHz, DMSO- <i>d</i> <sub>6</sub> ) complex mixture of rotamers $\delta$ 13.56 (s, 1H), 8.14 – 8.03 (m, 0.5H), 7.95 – 7.87 (m, 0.5H), 7.84 (s, 1H), 7.51 – 6.85 (m, 9H), 5.35 (s, 1H), 5.27 (s, 1H), 4.90 (s, 1H), 4.80 (s, 1H), 4.76 – 4.59 (m, 3H), 3.87 (s, 1H), 2.72 – 2.57 (m, 3H). LCMS (Method B): $t_R$ 3.18 min, 100%, LRMS (ESI) calcd. $C_{24}H_{23}F_2N_5O_4$ (M+H) <sup>+</sup> 484.2, found 484.2.                    |
| 52 |  <p><i>N</i>-(2-(difluoromethoxy)benzyl)-<i>N</i>-(2-(methylamino)-2-oxoethyl)-2-(octahydro-1<i>H</i>-isoindole-2-carbonyl)-1<i>H</i>-imidazole-4-carboxamide</p> | Yield 52%, <sup>1</sup> HNMR (400 MHz, DMSO- <i>d</i> <sub>6</sub> ) complex mixture of rotamers $\delta$ 13.39 (s, 1H), 7.94 – 7.82 (m, 1H), 7.75 (s, 1H), 7.43 – 7.00 (m, 5H), 5.41 – 5.18 (m, 1H), 4.74 – 4.44 (m, 2H), 3.95 – 3.75 (m, 2H), 3.56 – 3.19 (m, 3H), 2.59 (d, $J$ = 4.5 Hz, 3H), 2.30 – 1.88 (m, 2H), 1.63 – 0.94 (m, 8H). LCMS (Method B): $t_R$ 3.18 min, 100%, , LRMS (ESI) calcd. $C_{24}H_{29}F_2N_5O_4$ (M+H) <sup>+</sup> 490.2, found 490.2. |

|                                              |                                                                                                                                                                                                                                                |                                                                                                                                                                                                                                                                                                                                                                                                                                                                   |
|----------------------------------------------|------------------------------------------------------------------------------------------------------------------------------------------------------------------------------------------------------------------------------------------------|-------------------------------------------------------------------------------------------------------------------------------------------------------------------------------------------------------------------------------------------------------------------------------------------------------------------------------------------------------------------------------------------------------------------------------------------------------------------|
| <p style="text-align: center;"><b>53</b></p> | 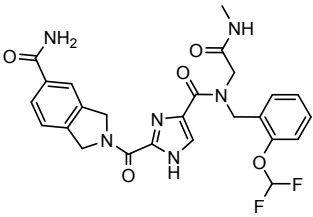 <p style="text-align: center;">2-(4-((2-(difluoromethoxy)benzyl)(2-(methylamino)-2-oxoethyl)carbamoyl)-1H-imidazole-2-carbonyl)isoindoline-5-carboxamide</p> | <p>Yield 64%, <sup>1</sup>HNMR (400 MHz, DMSO-d<sub>6</sub>) complex mixture of rotamers δ 13.47 (s, 1H), 8.10 (s, 0.5H), 8.04 – 7.73 (m, 4.3H), 7.56 – 7.16 (m, 6.7H), 7.11 – 6.93 (m, 0.5H), 5.54 – 5.19 (m, 2H), 5.00 – 4.53 (m, 5H), 3.99 – 3.79 (m, 1H), 2.71 – 2.58 (m, 3H). LCMS (Method B): t<sub>R</sub> 2.62 min, 100%, LRMS (ESI) calcd. C<sub>25</sub>H<sub>24</sub>F<sub>2</sub>N<sub>6</sub>O<sub>5</sub> (M+H)<sup>+</sup> 527.2, found 527.2.</p> |
|----------------------------------------------|------------------------------------------------------------------------------------------------------------------------------------------------------------------------------------------------------------------------------------------------|-------------------------------------------------------------------------------------------------------------------------------------------------------------------------------------------------------------------------------------------------------------------------------------------------------------------------------------------------------------------------------------------------------------------------------------------------------------------|

**Representative example 8 (route A): Synthesis of (R)-2-(4-((2-(difluoromethoxy)benzyl)(1-(methylamino)-1-oxopropan-2-yl)carbamoyl)-1H-imidazole-2-carbonyl)isoindoline-5-carboxamide (compound 54).**

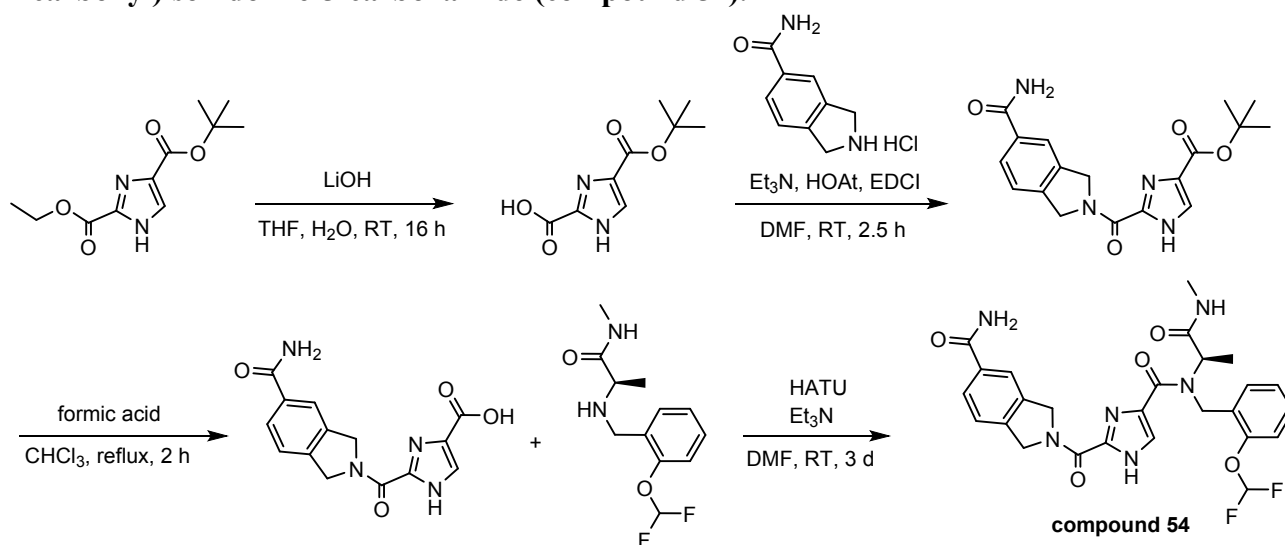

To a solution of 4-(tert-butoxycarbonyl)-2-ethyl-1H-imidazole-2,4-dicarboxylate (3.0 g, 12.5 mmol) in tetrahydrofuran (30 mL) and water (15 mL), lithium hydroxide mono hydrate (2.62 g, 62.4 mmol) was added and the mixture was stirred at room temperature for 16 hours. The mixture was neutralized to pH = 7 with formic acid and partially concentrated (~30 mL). The residue was purified by reversed phase chromatography (method A) and the appropriate fractions were lyophilized to afford 4-(tert-butoxycarbonyl)-1H-imidazole-2-carboxylic acid (2.63 g, 99%) as a white solid. <sup>1</sup>HNMR (400 MHz, DMSO-d<sub>6</sub>): δ 7.80 (s, 1H), 1.51 (s, 9H); LCMS (Method A): t<sub>R</sub> 1.42 min, LRMS (ESI) calcd. C<sub>9</sub>H<sub>12</sub>N<sub>2</sub>O<sub>4</sub> (M+H)<sup>+</sup> 213.2, found 213.1. To a solution of 4-(tert-butoxycarbonyl)-1H-imidazole-2-carboxylic acid (53.4 mg, 0.25 mmol) in dry *N,N*-dimethylformamide (3 mL) at room temperature, EDCI (53.1 mg, 0.28 mmol) and HOAt (37.7

mg, 0.28 mmol) were added and the mixture was stirred for 30 minutes. Next, triethylamine (70  $\mu$ L, 0.50 mmol) and isoindoline-5-carboxamide hydrochloride (50 mg, 0.25 mmol) were added and the mixture was stirred for 2 hours. The reaction mixture was purified by reversed phase chromatography (method A) and lyophilized to afford tert-butyl 2-(5-carbamoylisoindoline-2-carbonyl)-1*H*-imidazole-4-carboxylate (51 mg, 57%) as a white solid. <sup>1</sup>HNMR (400 MHz, DMSO-*d*<sub>6</sub>):  $\delta$  13.55 (s, 1H), 7.99 (d, *J* = 8.1 Hz, 1H), 7.90 (d, *J* = 8.7 Hz, 1H), 7.84 (d, *J* = 8.0 Hz, 1H), 7.80 (d, *J* = 2.9 Hz, 1H), 7.53 – 7.45 (m, 1H), 7.39 (d, *J* = 7.6 Hz, 1H), 5.42 (s, 2H), 4.93 (s, 2H), 1.53 (s, 9H); LRMS (Method A): *t*<sub>R</sub> 1.72 min, LCMS (ESI) calcd. C<sub>14</sub>H<sub>12</sub>N<sub>4</sub>O<sub>4</sub> (M-tBu+H)<sup>+</sup> 301.1, found 301.1. A suspension of tert-butyl-2-(5-carbamoylisoindoline-2-carbonyl)-1*H*-imidazole-4-carboxylate (249 mg, 0.70 mmol) in formic acid (10 mL) and chloroform (10 mL) was refluxed for 2 hours. The mixture was cooled to room temperature, concentrated, taken up in water and lyophilized to afford 2-(5-carbamoylisoindoline-2-carbonyl)-1*H*-imidazole-4-carboxylic acid (182 mg, 87%) as a white solid. <sup>1</sup>HNMR (400 MHz, DMSO-*d*<sub>6</sub>)  $\delta$  13.57 (s, 1H), 12.55 (s, 1H), 8.04 – 7.78 (m, 4H), 7.50 (t, *J* = 8.7 Hz, 1H), 7.39 (d, *J* = 6.4 Hz, 1H), 5.44 (s, 2H), 4.93 (s, 2H); LCMS (Method A): *t*<sub>R</sub> 1.35 min, 99%, MS (ESI) 301.1 (M+H)<sup>+</sup>. LRMS (Method A): *t*<sub>R</sub> 1.35 min, LCMS (ESI) calcd. C<sub>14</sub>H<sub>12</sub>N<sub>4</sub>O<sub>4</sub> (M+H)<sup>+</sup> 301.1, found 301.1. To a solution of 2-(5-carbamoylisoindoline-2-carbonyl)-1*H*-imidazole-4-carboxylic acid (17.4 mg, 0.058 mmol) in *N,N*-dimethylformamide (3 mL), HATU (22 mg, 0.058 mmol) and triethylamine (16  $\mu$ L, 0.12 mmol) were added. After 45 minutes (*R*)-2-((2-(difluoromethoxy)benzyl)amino)-*N*-methylpropanamide (16.5 mg, 0.064 mmol) was added and the reaction mixture was stirred at room temperature for 3 days. The reaction mixture was purified by reversed phase chromatography (method A) and the appropriate fractions were lyophilized to afford (*R*)-2-(4-((2-(difluoromethoxy)benzyl)(1-(methylamino)-1-oxopropan-2-yl)carbamoyl)-1*H*-imidazole-2-carbonyl)isoindoline-5-carboxamide (compound **54**, 17 mg, 54%) as a white solid. <sup>1</sup>HNMR (400 MHz, DMSO-*d*<sub>6</sub>) complex mixture of rotamers  $\delta$  13.23 (s, 1H), 8.24 – 7.65 (m, 4.6H), 7.60 – 6.90 (m, 7.4H), 6.19 – 5.91 (m, 0.3H), 5.65 – 5.31 (m, 1.3H), 5.19 – 4.24 (m, 5H), 2.65 – 2.55 (m, 3H), 1.49 – 1.04 (m, 3H); LCMS (Method B): *t*<sub>R</sub> 1.73 min, LRMS (ESI) calcd. C<sub>26</sub>H<sub>26</sub>F<sub>2</sub>N<sub>6</sub>O<sub>5</sub> (M+H)<sup>+</sup> 541.5, found 541.2.

### **Aqueous solubility assay**

Test compounds were dissolved in DMSO to a concentration of 10 mM and further diluted to 100  $\mu$ M in buffer (10 mM PBS, pH 7.4) in a 96 well plate. This results in a final DMSO concentration of 1%. The plates were shaken for 24 h at room temperature in an Eppendorf Thermomixer. After 24 h incubation, the plates were centrifuged for 20 minutes at 4680 rpm. From the supernatant 150  $\mu$ l was transferred to a new 96 well plate and 50  $\mu$ l DMSO was added to ensure continued dissolution. Samples were measured on LC-UV at injection volumes of 1 and 8  $\mu$ l. Peak areas were determined, and compared to peak areas obtained using calibration curves of the test compounds in DMSO.

### **Caco-2 assay**

The assay was ran at Pharmaron. Briefly, 50  $\mu$ L and 25 mL of cell culture medium (DMEM (Corning, 10-017-CVR) supplemented with 10% fetal bovine serum (Corning, 35-076-CVR), and Penicillin, Streptomycin mixture (Solarbio, P1400-100)) were added to each well of the Transwell insert and reservoir, respectively and then the HTS transwell plates (Corning, 3391) were incubated at 37  $^{\circ}$ C, 5% CO<sub>2</sub> for 1 hour before cell seeding. The Caco-2 plate was removed from the incubator and washed twice with pre-warmed HBSS (10 mM HEPES, pH 7.4), and then incubated at 37  $^{\circ}$ C for 30 minutes. The stock solutions of control compounds were diluted in DMSO to get 1 mM solutions and then diluted with HBSS (10 mM HEPES, pH 7.4) to get 5  $\mu$ M working solutions. The stock solutions of the test compounds were diluted in DMSO to get 400  $\mu$ M solutions and then diluted with HBSS (10 mM HEPES, pH 7.4) to get 2  $\mu$ M working solutions. The final concentration of DMSO in the incubation system was 0.5%. To determine the rate of drug transport in the apical to basolateral direction, 75  $\mu$ L of 2  $\mu$ M working solution of test compound was added to the Transwell insert (apical compartment) and the wells in the receiver plate (basolateral compartment) were filled with 235  $\mu$ L of HBSS (10 mM HEPES, pH 7.4). To determine the rate of drug transport in the basolateral to apical direction, 235  $\mu$ L of 2  $\mu$ M working solution of test compound was to the receiver plate wells (basolateral compartment) and then the Transwell inserts (apical compartment) were filled with 75  $\mu$ L of HBSS (10 mM HEPES, pH 7.4). Time 0 samples were prepared by transferring 50  $\mu$ L of 2  $\mu$ M working solution to wells of the 96-deepwell plate, followed by the addition of 200  $\mu$ L cold acetonitrile containing appropriate internal standards (IS). The plates were incubated at 37  $^{\circ}$ C for 2 hours. At the end of the incubation, 50  $\mu$ L samples from donor sides (apical compartment for Ap $\rightarrow$ Bl flux, and basolateral compartment for Bl $\rightarrow$ Ap) and receiver sides (basolateral compartment for Ap $\rightarrow$ Bl flux, and apical compartment for Bl $\rightarrow$ Ap) were transferred to wells of a new 96-well plate, followed by the addition of 4 volume of cold acetonitrile containing appropriate internal standards (IS). Samples were Vortexed for 5 minutes and then centrifuged at 3,220 g for 40 minutes. An aliquot of 100  $\mu$ L of the supernatant was mixed with an appropriate volume of ultra-pure water before LC-MS/MS analysis. Cell monolayer integrity was assessed by measuring TEER. The apparent permeability coefficient (Papp), in units of centimeter per second, can be calculated for Caco-2 drug transport assays using the following equation:

$$P_{app} = (VA \times [\text{drug}]_{\text{acceptor}}) / (\text{Area} \times \text{Time} \times [\text{drug}]_{\text{initial, donor}})$$



Where VA is the volume (in mL) in the acceptor well, Area is the surface area of the membrane (0.143 cm<sup>2</sup> for Transwell-96 Well Permeable Supports), and time is the total transport time in seconds. Propranolol and digoxin were used as controls in this assay.

### **S9 metabolic stability assay**

The assay was ran at BioDuro. Briefly, liver S9 fractions (final concentration 1 mg/mL) from mouse (CD-1 male, Xenotech, 1310026), rat (male, Xenotech, 1310212) and human (pooled, Xenotech, 1210091) were incubated with 1 μM test compounds at 37°C for 0, 5, 15, 30, and 60 minutes using NADPH (1 mM) in a phosphate buffer (0.05M, pH7.4). The reaction was stopped by the addition of cold acetonitrile, precipitated protein was removed, and the supernatants were analyzed using LCMS. The percent parent remaining was calculated using area ratio obtained from analyte peak area to the internal standard peak area in comparison to time 0 min. Phenacetin, diclofenac sodium salt, omeprazole, dextromethorphan hydrobromide and midazolam maleate were used as controls.

## Biochemical assay

Assays were conducted in 384 well-plates. MAP3K7/MAP3K7IP1 (TAK1-TAB1), all reagents and buffer were obtained from Life Technologies. The assay was performed according to the manufacturers protocol: [http://tools.thermofisher.com/content/sfs/manuals/MAP3K7-MAP3K7IP1\\_\(TAK1-TAB1\)\\_LanthaScreen\\_Activity.pdf](http://tools.thermofisher.com/content/sfs/manuals/MAP3K7-MAP3K7IP1_(TAK1-TAB1)_LanthaScreen_Activity.pdf).

In short: compounds were diluted and transferred to assay plate by echo, to get 10 concentration points in duplicate (98910 nM, 9891nM or 2968 top concentration, about 3 folds dilution). The compounds and protein were incubated for 30 minutes, before the reaction was started for 60 minutes at 25 °C. The final concentration of DMSO was 1%, enzyme was 700ng/ml, ATP was 10 μM and substrate was 0.1 μM. Next, 10μl EDTA and antibody detection reagent mixture were added, the mixture was incubated for 30 minutes, and the TR-FRET 520/495 ratio signal was read using a TECAN plate reader. The final concentration of EDTA was 10 mM and antibody was 2 nM. For the more potent compounds **53** and **54**, the assay was repeated using 989 nM top concentration and a final enzyme concentration of 140 ng/mL.

Single IC<sub>50</sub> values per compound:

| Cpd                  | TAK1 IC <sub>50</sub> in μM                                 | Cpd       | TAK1 IC <sub>50</sub> in μM |
|----------------------|-------------------------------------------------------------|-----------|-----------------------------|
| <b>Staurosporine</b> | 0.026; 0.036;<br>0.036; 0.039;<br>0.041; 0.048 <sup>c</sup> | <b>33</b> | >10; >10 <sup>b</sup>       |
| <b>2</b>             | 0.009; 0.011 <sup>b</sup>                                   | <b>34</b> | >10; >10 <sup>b</sup>       |
| <b>3</b>             | 0.024; 0.036 <sup>b</sup>                                   | <b>35</b> | >10; >10 <sup>b</sup>       |
| <b>7</b>             | 1.2; 1.4 <sup>a</sup>                                       | <b>36</b> | >10; >10 <sup>b</sup>       |
| <b>9</b>             | 0.9; 0.9 <sup>a</sup>                                       | <b>37</b> | 0.2; 0.8 <sup>b</sup>       |
| <b>10</b>            | 1.6; 1.8 <sup>a</sup>                                       | <b>38</b> | 0.8; 1.2 <sup>b</sup>       |
| <b>11</b>            | 3.1; 3.2 <sup>a</sup>                                       | <b>39</b> | >10; >10 <sup>b</sup>       |
| <b>12</b>            | 3.1; 3.9 <sup>a</sup>                                       | <b>40</b> | 0.2; 0.3 <sup>b</sup>       |
| <b>13</b>            | 2.8; 2.9 <sup>a</sup>                                       | <b>41</b> | 3.2; 5.8 <sup>b</sup>       |
| <b>14</b>            | 1.9; 3.3 <sup>a</sup>                                       | <b>42</b> | 1.9; 3.3 <sup>b</sup>       |
| <b>15</b>            | 3.4; 3.4 <sup>a</sup>                                       | <b>43</b> | 0.8; 1.5 <sup>b</sup>       |
| <b>16</b>            | 1.7; 1.9 <sup>a</sup>                                       | <b>44</b> | 1.2; 4.6 <sup>b</sup>       |
| <b>17</b>            | 10; 42 <sup>a</sup>                                         | <b>45</b> | 3.4; 8.0 <sup>a</sup>       |
| <b>18</b>            | 1.8; 1.8 <sup>a</sup>                                       | <b>46</b> | 0.6; 1.1 <sup>b</sup>       |
| <b>19</b>            | >100; >100 <sup>a</sup>                                     | <b>47</b> | 1.1; 1.3 <sup>b</sup>       |
| <b>20</b>            | 51; 67 <sup>a</sup>                                         | <b>48</b> | 2.2; 2.4 <sup>b</sup>       |
| <b>21</b>            | >100; >100 <sup>a</sup>                                     | <b>49</b> | >10; >10 <sup>b</sup>       |
| <b>22</b>            | 0.5; 0.7 <sup>b</sup>                                       | <b>50</b> | >10; >10 <sup>b</sup>       |
| <b>28</b>            | >10; >10 <sup>b</sup>                                       | <b>51</b> | 0.2; 0.4 <sup>b</sup>       |
| <b>29</b>            | >10; >10 <sup>b</sup>                                       | <b>52</b> | 2.4; 4.4 <sup>b</sup>       |
| <b>30</b>            | >10; >10 <sup>b</sup>                                       | <b>53</b> | 0.004; 0.006 <sup>d</sup>   |
| <b>31</b>            | >10; >10 <sup>b</sup>                                       | <b>54</b> | 0.001; 0.002 <sup>d</sup>   |
| <b>32</b>            | >10; >10 <sup>b</sup>                                       |           |                             |

<sup>a</sup>Top concentration: 98910 nM; <sup>b</sup>Top concentration 9891nM; <sup>c</sup>Top concentration 2968nM; <sup>d</sup>Top concentration 989 nM.

## Cell assay

The effect of test compounds on cell proliferation/viability was determined using the CellTiter-Glo® Assay (Promega). The human colorectal cancer cell line HCT-15 (ATCC CCL-25) was cultured in RPMI 1640 medium containing 10% FBS and maintained at 37°C and 5% CO<sub>2</sub>.

Eight hundred cells/well in 37 µl were seeded in 384 well plates in complete culture medium containing 10% FBS. Plates were incubated overnight at 37°C and 5% CO<sub>2</sub>. Test compounds were serially diluted 3-fold in 100% DMSO. The final DMSO concentration in each dilution was 0.5%. Forty nL of diluted compound was added to the test plate containing cells in triplicate determinations. TNF-α was added to the plates 2 hrs later at a final concentration of 10 ng/mL. Plates then were covered and incubated for 72 hrs at 37°C and 5% CO<sub>2</sub>.

Viability was assessed using the CellTiter-Glo® homogeneous luminescent assay kit according to the manufacturer's instructions. The assay determines the number of viable cells in culture by quantifying ATP, which indicates the presence of metabolically active cells. Briefly, 30 µl of room temperature CellTiter-Glo® reagent was added to each well, the plate was incubated at room temperature for 30 minutes followed by luminescence recording on a Spark 10M multimodal plate reader (Tecan).

Single EC<sub>50</sub> values per compound:

| Cpd       | EC <sub>50</sub> in µM              |
|-----------|-------------------------------------|
| <b>1</b>  | 0.001, 0.002,<br>0.002 <sup>a</sup> |
| <b>54</b> | >10, >10, >10 <sup>b</sup>          |

<sup>a</sup>Top concentration: 100 nM; <sup>b</sup>Top concentration 10000 nM

## **Affinity-Mediated Selection of DNA-Encoded Chemical Libraries**

Hexahistidine tagged TAK1-TAB1 fusion protein was sourced from Eurofins (Luxembourg, catalog number 14-600) and an ADP-Glo™ assay (Promega, Madison, WI, catalog number V6930) was established in which the protein was shown to have dose-dependent autophosphorylation activity. The protein was also demonstrated to be a monomer by SEC and to undergo a thermal transition at 54°C. The protein was shown to be efficiently captured on the IMAC matrix His-Select® (Sigma-Aldrich, St. Louis, MO, catalog number P6611). Four parallel affinity-mediated selections were then performed as previously described.<sup>1,2</sup> Briefly, twenty-one different DNA-encoded chemical libraries were combined and this mixture was incubated with TAK1-TAB1 fusion protein each in a 60 µl volume in Cytosolic Selection Buffer (20 mM HEPES, 134 mM Potassium Acetate, 8 mM Sodium Acetate, 4 mM Sodium Chloride, 0.8 mM Magnesium Acetate, 1 mg/ml Sheared Salmon Sperm DNA, 1 mM DTT, 0.02% Tween-20, pH 7.2). Separate incubations were set up with no target, TAK1-TAB1 at 7.8 µM, TAK1-TAB1 at 1.6 µM and with TAK1-TAB1 at 7.8 µM and oxozeaenol at 40 µM (pre-incubated for one hour) with 50 pmoles of each library. After a one-hour incubation the mixtures were captured on 5 µl of His-Select IMAC matrix constrained within a 20 µl Phytip mounted on a Phynexus ME-200 automated 12-tip pipettor. After capture the matrices were washed eight times with changes of buffer and then heat-eluted at 85°C into the same buffer. A second round of selection was performed using the round-one eluate as input and fresh proteins and oxozeaenol repeating the conditions of the first round. The encoding DNA in the output of the second round of selection was amplified using PCR with primers that introduce the Illumina READ1 and READ2 sequences and the amplified sample was submitted for sequencing using an Illumina 2500 instrument in high-output mode. Ninety-seven million single-end reads were generated across all twenty-one libraries for these four selections.

## KINOMEScan data

Compound **22** was screened at 10  $\mu$ M against 468 kinases using DiscoverX's KINOMEScan™ screening technology (scanMAX).

Treespot interaction map for compound **22**, S-Score (35) = 0.01.

$S(35) = (\text{number of non-mutant kinases with \%Ctrl} < 35) / (\text{number of non-mutant kinases tested}) = (4/403)$ .

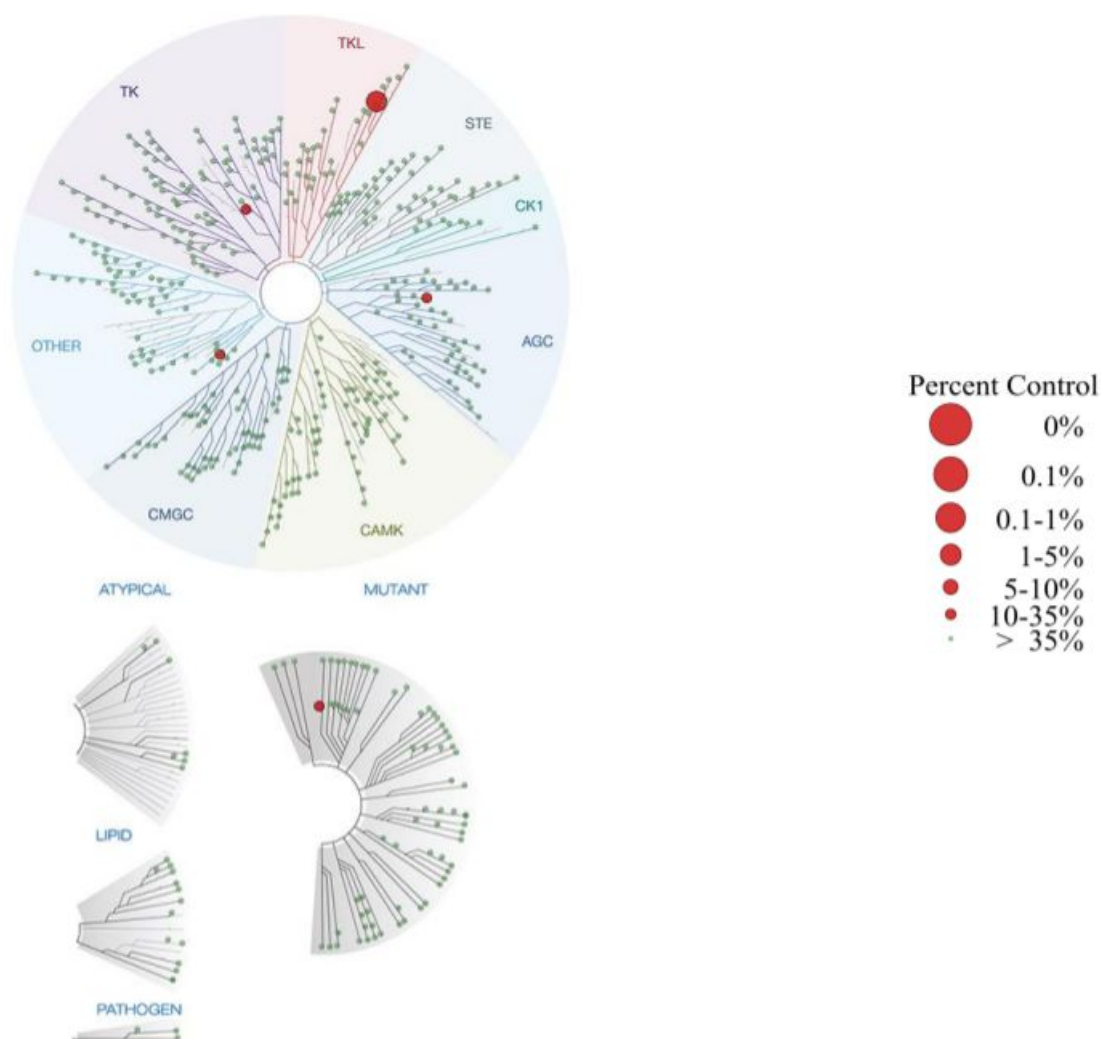

| DiscoverX Gene Symbol         | Entrez Gene Symbol | Percent Control |
|-------------------------------|--------------------|-----------------|
| AAK1                          | AAK1               | 95              |
| ABL1(E255K)-phosphorylated    | ABL1               | 73              |
| ABL1(F317I)-nonphosphorylated | ABL1               | 85              |
| ABL1(F317I)-phosphorylated    | ABL1               | 100             |
| ABL1(F317L)-nonphosphorylated | ABL1               | 90              |
| ABL1(F317L)-phosphorylated    | ABL1               | 100             |
| ABL1(H396P)-nonphosphorylated | ABL1               | 30              |
| ABL1(H396P)-phosphorylated    | ABL1               | 90              |

|                                   |        |     |
|-----------------------------------|--------|-----|
| ABL1(M351T)-phosphorylated        | ABL1   | 100 |
| ABL1(Q252H)-<br>nonphosphorylated | ABL1   | 70  |
| ABL1(Q252H)-phosphorylated        | ABL1   | 98  |
| ABL1(T315I)-nonphosphorylated     | ABL1   | 90  |
| ABL1(T315I)-phosphorylated        | ABL1   | 96  |
| ABL1(Y253F)-phosphorylated        | ABL1   | 100 |
| ABL1-nonphosphorylated            | ABL1   | 77  |
| ABL1-phosphorylated               | ABL1   | 92  |
| ABL2                              | ABL2   | 92  |
| ACVR1                             | ACVR1  | 100 |
| ACVR1B                            | ACVR1B | 94  |
| ACVR2A                            | ACVR2A | 100 |
| ACVR2B                            | ACVR2B | 100 |
| ACVRL1                            | ACVRL1 | 91  |
| ADCK3                             | CABC1  | 100 |
| ADCK4                             | ADCK4  | 93  |
| AKT1                              | AKT1   | 97  |
| AKT2                              | AKT2   | 100 |
| AKT3                              | AKT3   | 94  |
| ALK                               | ALK    | 100 |
| ALK(C1156Y)                       | ALK    | 100 |
| ALK(L1196M)                       | ALK    | 100 |
| AMPK-alpha1                       | PRKAA1 | 100 |
| AMPK-alpha2                       | PRKAA2 | 70  |
| ANKK1                             | ANKK1  | 100 |
| ARK5                              | NUAK1  | 83  |
| ASK1                              | MAP3K5 | 100 |
| ASK2                              | MAP3K6 | 100 |
| AURKA                             | AURKA  | 86  |
| AURKB                             | AURKB  | 100 |
| AURKC                             | AURKC  | 87  |
| AXL                               | AXL    | 82  |
| BIKE                              | BMP2K  | 81  |
| BLK                               | BLK    | 100 |
| BMPR1A                            | BMPR1A | 93  |
| BMPR1B                            | BMPR1B | 91  |
| BMPR2                             | BMPR2  | 100 |
| BMX                               | BMX    | 100 |
| BRAF                              | BRAF   | 100 |
| BRAF(V600E)                       | BRAF   | 100 |
| BRK                               | PTK6   | 100 |
| BRSK1                             | BRSK1  | 100 |
| BRSK2                             | BRSK2  | 100 |
| BTK                               | BTK    | 84  |
| BUB1                              | BUB1   | 88  |
| CAMK1                             | CAMK1  | 100 |
| CAMK1B                            | PNCK   | 88  |

|                     |          |     |
|---------------------|----------|-----|
| CAMK1D              | CAMK1D   | 100 |
| CAMK1G              | CAMK1G   | 100 |
| CAMK2A              | CAMK2A   | 88  |
| CAMK2B              | CAMK2B   | 84  |
| CAMK2D              | CAMK2D   | 90  |
| CAMK2G              | CAMK2G   | 96  |
| CAMK4               | CAMK4    | 70  |
| CAMKK1              | CAMKK1   | 100 |
| CAMKK2              | CAMKK2   | 95  |
| CASK                | CASK     | 100 |
| CDC2L1              | CDK11B   | 100 |
| CDC2L2              | CDC2L2   | 100 |
| CDC2L5              | CDK13    | 88  |
| CDK11               | CDK19    | 99  |
| CDK2                | CDK2     | 93  |
| CDK3                | CDK3     | 94  |
| CDK4                | CDK4     | 99  |
| CDK4-cyclinD1       | CDK4     | 100 |
| CDK4-cyclinD3       | CDK4     | 100 |
| CDK5                | CDK5     | 100 |
| CDK7                | CDK7     | 100 |
| CDK8                | CDK8     | 94  |
| CDK9                | CDK9     | 100 |
| CDKL1               | CDKL1    | 95  |
| CDKL2               | CDKL2    | 100 |
| CDKL3               | CDKL3    | 98  |
| CDKL5               | CDKL5    | 100 |
| CHEK1               | CHEK1    | 81  |
| CHEK2               | CHEK2    | 95  |
| CIT                 | CIT      | 100 |
| CLK1                | CLK1     | 88  |
| CLK2                | CLK2     | 87  |
| CLK3                | CLK3     | 79  |
| CLK4                | CLK4     | 74  |
| CSF1R               | CSF1R    | 78  |
| CSF1R-autoinhibited | CSF1R    | 100 |
| CSK                 | CSK      | 100 |
| CSNK1A1             | CSNK1A1  | 85  |
| CSNK1A1L            | CSNK1A1L | 100 |
| CSNK1D              | CSNK1D   | 100 |
| CSNK1E              | CSNK1E   | 90  |
| CSNK1G1             | CSNK1G1  | 100 |
| CSNK1G2             | CSNK1G2  | 100 |
| CSNK1G3             | CSNK1G3  | 100 |
| CSNK2A1             | CSNK2A1  | 97  |
| CSNK2A2             | CSNK2A2  | 100 |
| CTK                 | MATK     | 98  |
| DAPK1               | DAPK1    | 95  |

|                           |          |     |
|---------------------------|----------|-----|
| DAPK2                     | DAPK2    | 100 |
| DAPK3                     | DAPK3    | 91  |
| DCAMKL1                   | DCLK1    | 100 |
| DCAMKL2                   | DCLK2    | 96  |
| DCAMKL3                   | DCLK3    | 53  |
| DDR1                      | DDR1     | 90  |
| DDR2                      | DDR2     | 100 |
| DLK                       | MAP3K12  | 100 |
| DMPK                      | DMPK     | 95  |
| DMPK2                     | CDC42BPG | 100 |
| DRAK1                     | STK17A   | 92  |
| DRAK2                     | STK17B   | 90  |
| DYRK1A                    | DYRK1A   | 100 |
| DYRK1B                    | DYRK1B   | 100 |
| DYRK2                     | DYRK2    | 100 |
| EGFR                      | EGFR     | 67  |
| EGFR(E746-A750del)        | EGFR     | 98  |
| EGFR(G719C)               | EGFR     | 100 |
| EGFR(G719S)               | EGFR     | 100 |
| EGFR(L747-E749del, A750P) | EGFR     | 88  |
| EGFR(L747-S752del, P753S) | EGFR     | 98  |
| EGFR(L747-T751del,Sins)   | EGFR     | 98  |
| EGFR(L858R)               | EGFR     | 94  |
| EGFR(L858R,T790M)         | EGFR     | 100 |
| EGFR(L861Q)               | EGFR     | 100 |
| EGFR(S752-I759del)        | EGFR     | 98  |
| EGFR(T790M)               | EGFR     | 100 |
| EIF2AK1                   | EIF2AK1  | 14  |
| EPHA1                     | EPHA1    | 95  |
| EPHA2                     | EPHA2    | 100 |
| EPHA3                     | EPHA3    | 90  |
| EPHA4                     | EPHA4    | 100 |
| EPHA5                     | EPHA5    | 97  |
| EPHA6                     | EPHA6    | 100 |
| EPHA7                     | EPHA7    | 100 |
| EPHA8                     | EPHA8    | 100 |
| EPHB1                     | EPHB1    | 100 |
| EPHB2                     | EPHB2    | 100 |
| EPHB3                     | EPHB3    | 100 |
| EPHB4                     | EPHB4    | 100 |
| EPHB6                     | EPHB6    | 85  |
| ERBB2                     | ERBB2    | 100 |
| ERBB3                     | ERBB3    | 100 |
| ERBB4                     | ERBB4    | 100 |
| ERK1                      | MAPK3    | 100 |
| ERK2                      | MAPK1    | 94  |
| ERK3                      | MAPK6    | 97  |
| ERK4                      | MAPK4    | 100 |



|                       |         |     |
|-----------------------|---------|-----|
| ERK5                  | MAPK7   | 100 |
| ERK8                  | MAPK15  | 94  |
| ERN1                  | ERN1    | 91  |
| FAK                   | PTK2    | 99  |
| FER                   | FER     | 100 |
| FES                   | FES     | 100 |
| FGFR1                 | FGFR1   | 98  |
| FGFR2                 | FGFR2   | 83  |
| FGFR3                 | FGFR3   | 96  |
| FGFR3(G697C)          | FGFR3   | 90  |
| FGFR4                 | FGFR4   | 98  |
| FGR                   | FGR     | 100 |
| FLT1                  | FLT1    | 100 |
| FLT3                  | FLT3    | 85  |
| FLT3(D835H)           | FLT3    | 90  |
| FLT3(D835V)           | FLT3    | 69  |
| FLT3(D835Y)           | FLT3    | 84  |
| FLT3(ITD)             | FLT3    | 100 |
| FLT3(ITD,D835V)       | FLT3    | 100 |
| FLT3(ITD,F691L)       | FLT3    | 82  |
| FLT3(K663Q)           | FLT3    | 89  |
| FLT3(N841I)           | FLT3    | 80  |
| FLT3(R834Q)           | FLT3    | 88  |
| FLT3-autoinhibited    | FLT3    | 100 |
| FLT4                  | FLT4    | 100 |
| FRK                   | FRK     | 100 |
| FYN                   | FYN     | 100 |
| GAK                   | GAK     | 100 |
| GCN2(Kin.Dom.2,S808G) | EIF2AK4 | 87  |
| GRK1                  | GRK1    | 73  |
| GRK2                  | ADRBK1  | 100 |
| GRK3                  | ADRBK2  | 98  |
| GRK4                  | GRK4    | 99  |
| GRK7                  | GRK7    | 100 |
| GSK3A                 | GSK3A   | 77  |
| GSK3B                 | GSK3B   | 100 |
| HASPIN                | GSG2    | 89  |
| HCK                   | HCK     | 100 |
| HIPK1                 | HIPK1   | 100 |
| HIPK2                 | HIPK2   | 90  |
| HIPK3                 | HIPK3   | 100 |
| HIPK4                 | HIPK4   | 100 |
| HPK1                  | MAP4K1  | 92  |
| HUNK                  | HUNK    | 98  |
| ICK                   | ICK     | 93  |
| IGF1R                 | IGF1R   | 90  |
| IKK-alpha             | CHUK    | 99  |
| IKK-beta              | IKBKB   | 100 |

|                              |          |     |
|------------------------------|----------|-----|
| IKK-epsilon                  | IKBKE    | 100 |
| INSR                         | INSR     | 100 |
| INSRR                        | INSRR    | 88  |
| IRAK1                        | IRAK1    | 100 |
| IRAK3                        | IRAK3    | 98  |
| IRAK4                        | IRAK4    | 97  |
| ITK                          | ITK      | 100 |
| JAK1(JH1domain-catalytic)    | JAK1     | 76  |
| JAK1(JH2domain-pseudokinase) | JAK1     | 100 |
| JAK2(JH1domain-catalytic)    | JAK2     | 50  |
| JAK3(JH1domain-catalytic)    | JAK3     | 62  |
| JNK1                         | MAPK8    | 87  |
| JNK2                         | MAPK9    | 89  |
| JNK3                         | MAPK10   | 96  |
| KIT                          | KIT      | 100 |
| KIT(A829P)                   | KIT      | 89  |
| KIT(D816H)                   | KIT      | 74  |
| KIT(D816V)                   | KIT      | 100 |
| KIT(L576P)                   | KIT      | 97  |
| KIT(V559D)                   | KIT      | 100 |
| KIT(V559D,T670I)             | KIT      | 98  |
| KIT(V559D,V654A)             | KIT      | 100 |
| KIT-autoinhibited            | KIT      | 98  |
| LATS1                        | LATS1    | 97  |
| LATS2                        | LATS2    | 100 |
| LCK                          | LCK      | 100 |
| LIMK1                        | LIMK1    | 98  |
| LIMK2                        | LIMK2    | 100 |
| LKB1                         | STK11    | 88  |
| LOK                          | STK10    | 99  |
| LRRK2                        | LRRK2    | 100 |
| LRRK2(G2019S)                | LRRK2    | 83  |
| LTK                          | LTK      | 97  |
| LYN                          | LYN      | 100 |
| LZK                          | MAP3K13  | 83  |
| MAK                          | MAK      | 86  |
| MAP3K1                       | MAP3K1   | 100 |
| MAP3K15                      | MAP3K15  | 97  |
| MAP3K2                       | MAP3K2   | 89  |
| MAP3K3                       | MAP3K3   | 100 |
| MAP3K4                       | MAP3K4   | 97  |
| MAP4K2                       | MAP4K2   | 100 |
| MAP4K3                       | MAP4K3   | 100 |
| MAP4K4                       | MAP4K4   | 91  |
| MAP4K5                       | MAP4K5   | 100 |
| MAPKAPK2                     | MAPKAPK2 | 100 |
| MAPKAPK5                     | MAPKAPK5 | 100 |
| MARK1                        | MARK1    | 89  |

|             |          |     |
|-------------|----------|-----|
| MARK2       | MARK2    | 90  |
| MARK3       | MARK3    | 100 |
| MARK4       | MARK4    | 99  |
| MAST1       | MAST1    | 100 |
| MEK1        | MAP2K1   | 86  |
| MEK2        | MAP2K2   | 90  |
| MEK3        | MAP2K3   | 100 |
| MEK4        | MAP2K4   | 100 |
| MEK5        | MAP2K5   | 98  |
| MEK6        | MAP2K6   | 78  |
| MELK        | MELK     | 97  |
| MERTK       | MERTK    | 83  |
| MET         | MET      | 97  |
| MET(M1250T) | MET      | 96  |
| MET(Y1235D) | MET      | 94  |
| MINK        | MINK1    | 91  |
| MKK7        | MAP2K7   | 100 |
| MKNK1       | MKNK1    | 100 |
| MKNK2       | MKNK2    | 76  |
| MLCK        | MYLK3    | 96  |
| MLK1        | MAP3K9   | 100 |
| MLK2        | MAP3K10  | 89  |
| MLK3        | MAP3K11  | 100 |
| MRCKA       | CDC42BPA | 100 |
| MRCKB       | CDC42BPB | 93  |
| MST1        | STK4     | 100 |
| MST1R       | MST1R    | 94  |
| MST2        | STK3     | 86  |
| MST3        | STK24    | 98  |
| MST4        | MST4     | 100 |
| MTOR        | MTOR     | 92  |
| MUSK        | MUSK     | 100 |
| MYLK        | MYLK     | 94  |
| MYLK2       | MYLK2    | 100 |
| MYLK4       | MYLK4    | 97  |
| MYO3A       | MYO3A    | 100 |
| MYO3B       | MYO3B    | 91  |
| NDR1        | STK38    | 88  |
| NDR2        | STK38L   | 97  |
| NEK1        | NEK1     | 87  |
| NEK10       | NEK10    | 100 |
| NEK11       | NEK11    | 100 |
| NEK2        | NEK2     | 100 |
| NEK3        | NEK3     | 83  |
| NEK4        | NEK4     | 100 |
| NEK5        | NEK5     | 100 |
| NEK6        | NEK6     | 98  |
| NEK7        | NEK7     | 100 |

|                       |             |     |
|-----------------------|-------------|-----|
| NEK9                  | NEK9        | 97  |
| NIK                   | MAP3K14     | 100 |
| NIM1                  | MGC42105    | 94  |
| NLK                   | NLK         | 99  |
| OSR1                  | OXSRI       | 100 |
| p38-alpha             | MAPK14      | 97  |
| p38-beta              | MAPK11      | 96  |
| p38-delta             | MAPK13      | 95  |
| p38-gamma             | MAPK12      | 100 |
| PAK1                  | PAK1        | 94  |
| PAK2                  | PAK2        | 69  |
| PAK3                  | PAK3        | 88  |
| PAK4                  | PAK4        | 100 |
| PAK6                  | PAK6        | 100 |
| PAK7                  | PAK7        | 89  |
| PCKT1                 | CDK16       | 100 |
| PCKT2                 | CDK17       | 100 |
| PCKT3                 | CDK18       | 93  |
| PDGFRA                | PDGFRA      | 97  |
| PDGFRB                | PDGFRB      | 82  |
| PDPK1                 | PDPK1       | 96  |
| PFCDPK1(P.falciparum) | CDPK1       | 83  |
| PFPK5(P.falciparum)   | MAL13P1.279 | 100 |
| PFTAIRE2              | CDK15       | 100 |
| PFTK1                 | CDK14       | 100 |
| PHKG1                 | PHKG1       | 100 |
| PHKG2                 | PHKG2       | 100 |
| PIK3C2B               | PIK3C2B     | 100 |
| PIK3C2G               | PIK3C2G     | 100 |
| PIK3CA                | PIK3CA      | 100 |
| PIK3CA(C420R)         | PIK3CA      | 100 |
| PIK3CA(E542K)         | PIK3CA      | 93  |
| PIK3CA(E545A)         | PIK3CA      | 98  |
| PIK3CA(E545K)         | PIK3CA      | 97  |
| PIK3CA(H1047L)        | PIK3CA      | 100 |
| PIK3CA(H1047Y)        | PIK3CA      | 89  |
| PIK3CA(I800L)         | PIK3CA      | 100 |
| PIK3CA(M1043I)        | PIK3CA      | 100 |
| PIK3CA(Q546K)         | PIK3CA      | 90  |
| PIK3CB                | PIK3CB      | 84  |
| PIK3CD                | PIK3CD      | 88  |
| PIK3CG                | PIK3CG      | 92  |
| PIK4CB                | PI4KB       | 100 |
| PIKFYVE               | PIKFYVE     | 100 |
| PIM1                  | PIM1        | 100 |
| PIM2                  | PIM2        | 96  |
| PIM3                  | PIM3        | 89  |
| PIP5K1A               | PIP5K1A     | 100 |

|                               |          |     |
|-------------------------------|----------|-----|
| PIP5K1C                       | PIP5K1C  | 62  |
| PIP5K2B                       | PIP4K2B  | 97  |
| PIP5K2C                       | PIP4K2C  | 93  |
| PKAC-alpha                    | PRKACA   | 99  |
| PKAC-beta                     | PRKACB   | 92  |
| PKMYT1                        | PKMYT1   | 100 |
| PKN1                          | PKN1     | 82  |
| PKN2                          | PKN2     | 98  |
| PKNB(M.tuberculosis)          | pknB     | 100 |
| PLK1                          | PLK1     | 100 |
| PLK2                          | PLK2     | 100 |
| PLK3                          | PLK3     | 100 |
| PLK4                          | PLK4     | 92  |
| PRKCD                         | PRKCD    | 100 |
| PRKCE                         | PRKCE    | 100 |
| PRKCH                         | PRKCH    | 78  |
| PRKCI                         | PRKCI    | 87  |
| PRKCQ                         | PRKCQ    | 88  |
| PRKD1                         | PRKD1    | 85  |
| PRKD2                         | PRKD2    | 95  |
| PRKD3                         | PRKD3    | 87  |
| PRKG1                         | PRKG1    | 92  |
| PRKG2                         | PRKG2    | 98  |
| PRKR                          | EIF2AK2  | 78  |
| PRKX                          | PRKX     | 100 |
| PRP4                          | PRPF4B   | 100 |
| PYK2                          | PTK2B    | 88  |
| QSK                           | KIAA0999 | 100 |
| RAF1                          | RAF1     | 100 |
| RET                           | RET      | 92  |
| RET(M918T)                    | RET      | 100 |
| RET(V804L)                    | RET      | 100 |
| RET(V804M)                    | RET      | 100 |
| RIOK1                         | RIOK1    | 84  |
| RIOK2                         | RIOK2    | 98  |
| RIOK3                         | RIOK3    | 92  |
| RIPK1                         | RIPK1    | 100 |
| RIPK2                         | RIPK2    | 99  |
| RIPK4                         | RIPK4    | 89  |
| RIPK5                         | DSTYK    | 100 |
| ROCK1                         | ROCK1    | 100 |
| ROCK2                         | ROCK2    | 97  |
| ROS1                          | ROS1     | 84  |
| RPS6KA4(Kin.Dom.1-N-terminal) | RPS6KA4  | 89  |
| RPS6KA4(Kin.Dom.2-C-terminal) | RPS6KA4  | 100 |
| RPS6KA5(Kin.Dom.1-N-terminal) | RPS6KA5  | 77  |
| RPS6KA5(Kin.Dom.2-C-terminal) | RPS6KA5  | 86  |
| RSK1(Kin.Dom.1-N-terminal)    | RPS6KA1  | 100 |

|                            |         |     |
|----------------------------|---------|-----|
| RSK1(Kin.Dom.2-C-terminal) | RPS6KA1 | 85  |
| RSK2(Kin.Dom.1-N-terminal) | RPS6KA3 | 100 |
| RSK2(Kin.Dom.2-C-terminal) | RPS6KA3 | 100 |
| RSK3(Kin.Dom.1-N-terminal) | RPS6KA2 | 100 |
| RSK3(Kin.Dom.2-C-terminal) | RPS6KA2 | 95  |
| RSK4(Kin.Dom.1-N-terminal) | RPS6KA6 | 100 |
| RSK4(Kin.Dom.2-C-terminal) | RPS6KA6 | 95  |
| S6K1                       | RPS6KB1 | 100 |
| SBK1                       | SBK1    | 100 |
| SGK                        | SGK1    | 100 |
| SgK110                     | SgK110  | 93  |
| SGK2                       | SGK2    | 100 |
| SGK3                       | SGK3    | 100 |
| SIK                        | SIK1    | 100 |
| SIK2                       | SIK2    | 89  |
| SLK                        | SLK     | 97  |
| SNARK                      | NUAK2   | 88  |
| SNRK                       | SNRK    | 94  |
| SRC                        | SRC     | 100 |
| SRMS                       | SRMS    | 100 |
| SRPK1                      | SRPK1   | 96  |
| SRPK2                      | SRPK2   | 94  |
| SRPK3                      | SRPK3   | 93  |
| STK16                      | STK16   | 91  |
| STK33                      | STK33   | 100 |
| STK35                      | STK35   | 99  |
| STK36                      | STK36   | 100 |
| STK39                      | STK39   | 100 |
| SYK                        | SYK     | 69  |
| TAK1                       | MAP3K7  | 1   |
| TAOK1                      | TAOK1   | 100 |
| TAOK2                      | TAOK2   | 98  |
| TAOK3                      | TAOK3   | 100 |
| TBK1                       | TBK1    | 100 |
| TEC                        | TEC     | 97  |
| TESK1                      | TESK1   | 97  |
| TGFBR1                     | TGFBR1  | 96  |
| TGFBR2                     | TGFBR2  | 88  |
| TIE1                       | TIE1    | 90  |
| TIE2                       | TEK     | 100 |
| TLK1                       | TLK1    | 57  |
| TLK2                       | TLK2    | 43  |
| TNIK                       | TNIK    | 98  |
| TNK1                       | TNK1    | 59  |
| TNK2                       | TNK2    | 20  |
| TNNI3K                     | TNNI3K  | 90  |
| TRKA                       | NTRK1   | 98  |
| TRKB                       | NTRK2   | 100 |

|                              |         |     |
|------------------------------|---------|-----|
| TRKC                         | NTRK3   | 95  |
| TRPM6                        | TRPM6   | 100 |
| TSSK1B                       | TSSK1B  | 90  |
| TSSK3                        | TSSK3   | 100 |
| TTK                          | TTK     | 94  |
| TXK                          | TXK     | 91  |
| TYK2(JH1domain-catalytic)    | TYK2    | 100 |
| TYK2(JH2domain-pseudokinase) | TYK2    | 70  |
| TYRO3                        | TYRO3   | 100 |
| ULK1                         | ULK1    | 100 |
| ULK2                         | ULK2    | 100 |
| ULK3                         | ULK3    | 100 |
| VEGFR2                       | KDR     | 100 |
| VPS34                        | PIK3C3  | 85  |
| VRK2                         | VRK2    | 100 |
| WEE1                         | WEE1    | 100 |
| WEE2                         | WEE2    | 96  |
| WNK1                         | WNK1    | 100 |
| WNK2                         | WNK2    | 100 |
| WNK3                         | WNK3    | 100 |
| WNK4                         | WNK4    | 100 |
| YANK1                        | STK32A  | 16  |
| YANK2                        | STK32B  | 75  |
| YANK3                        | STK32C  | 87  |
| YES                          | YES1    | 64  |
| YSK1                         | STK25   | 91  |
| YSK4                         | MAP3K19 | 99  |
| ZAK                          | ZAK     | 97  |
| ZAP70                        | ZAP70   | 100 |

## KINOMEScan data

Compound **54** was screened at 1  $\mu$ M against 468 kinases using DiscoverX's KINOMEScan™ screening technology (scanMAX).

Treespot interaction map for compound **54**, S-Score (35) = 0.015.

$S(35) = (\text{number of non-mutant kinases with \%Ctrl} < 35) / (\text{number of non-mutant kinases tested}) = (6/403)$ .

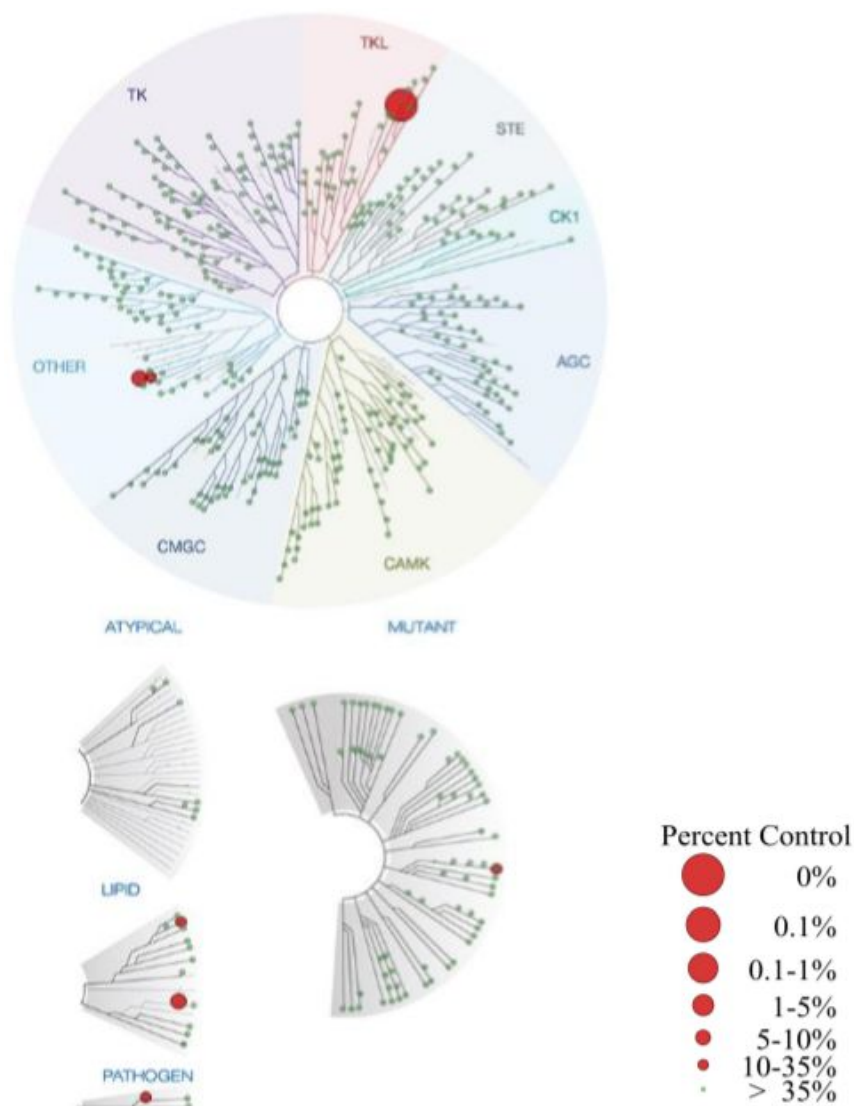

| DiscoverX Gene Symbol         | Entrez Gene Symbol | Percent Control |
|-------------------------------|--------------------|-----------------|
| AAK1                          | AAK1               | 84              |
| ABL1(E255K)-phosphorylated    | ABL1               | 65              |
| ABL1(F317I)-nonphosphorylated | ABL1               | 80              |
| ABL1(F317I)-phosphorylated    | ABL1               | 61              |
| ABL1(F317L)-nonphosphorylated | ABL1               | 76              |
| ABL1(F317L)-phosphorylated    | ABL1               | 82              |



|                                   |        |     |
|-----------------------------------|--------|-----|
| ABL1(H396P)-<br>nonphosphorylated | ABL1   | 56  |
| ABL1(H396P)-phosphorylated        | ABL1   | 68  |
| ABL1(M351T)-phosphorylated        | ABL1   | 63  |
| ABL1(Q252H)-<br>nonphosphorylated | ABL1   | 64  |
| ABL1(Q252H)-phosphorylated        | ABL1   | 53  |
| ABL1(T315I)-nonphosphorylated     | ABL1   | 91  |
| ABL1(T315I)-phosphorylated        | ABL1   | 81  |
| ABL1(Y253F)-phosphorylated        | ABL1   | 62  |
| ABL1-nonphosphorylated            | ABL1   | 82  |
| ABL1-phosphorylated               | ABL1   | 80  |
| ABL2                              | ABL2   | 100 |
| ACVR1                             | ACVR1  | 100 |
| ACVR1B                            | ACVR1B | 96  |
| ACVR2A                            | ACVR2A | 82  |
| ACVR2B                            | ACVR2B | 87  |
| ACVRL1                            | ACVRL1 | 95  |
| ADCK3                             | CABC1  | 92  |
| ADCK4                             | ADCK4  | 87  |
| AKT1                              | AKT1   | 95  |
| AKT2                              | AKT2   | 98  |
| AKT3                              | AKT3   | 96  |
| ALK                               | ALK    | 67  |
| ALK(C1156Y)                       | ALK    | 84  |
| ALK(L1196M)                       | ALK    | 83  |
| AMPK-alpha1                       | PRKAA1 | 94  |
| AMPK-alpha2                       | PRKAA2 | 88  |
| ANKK1                             | ANKK1  | 74  |
| ARK5                              | NUAK1  | 100 |
| ASK1                              | MAP3K5 | 75  |
| ASK2                              | MAP3K6 | 74  |
| AURKA                             | AURKA  | 82  |
| AURKB                             | AURKB  | 80  |
| AURKC                             | AURKC  | 83  |
| AXL                               | AXL    | 90  |
| BIKE                              | BMP2K  | 84  |
| BLK                               | BLK    | 77  |
| BMPR1A                            | BMPR1A | 95  |
| BMPR1B                            | BMPR1B | 83  |
| BMPR2                             | BMPR2  | 89  |
| BMX                               | BMX    | 100 |
| BRAF                              | BRAF   | 80  |
| BRAF(V600E)                       | BRAF   | 82  |
| BRK                               | PTK6   | 99  |
| BRSK1                             | BRSK1  | 98  |
| BRSK2                             | BRSK2  | 97  |
| BTK                               | BTK    | 80  |

|                     |          |     |
|---------------------|----------|-----|
| BUB1                | BUB1     | 72  |
| CAMK1               | CAMK1    | 92  |
| CAMK1B              | PNCK     | 77  |
| CAMK1D              | CAMK1D   | 89  |
| CAMK1G              | CAMK1G   | 100 |
| CAMK2A              | CAMK2A   | 85  |
| CAMK2B              | CAMK2B   | 95  |
| CAMK2D              | CAMK2D   | 97  |
| CAMK2G              | CAMK2G   | 83  |
| CAMK4               | CAMK4    | 100 |
| CAMKK1              | CAMKK1   | 86  |
| CAMKK2              | CAMKK2   | 82  |
| CASK                | CASK     | 90  |
| CDC2L1              | CDK11B   | 95  |
| CDC2L2              | CDC2L2   | 99  |
| CDC2L5              | CDK13    | 89  |
| CDK11               | CDK19    | 97  |
| CDK2                | CDK2     | 96  |
| CDK3                | CDK3     | 95  |
| CDK4                | CDK4     | 60  |
| CDK4-cyclinD1       | CDK4     | 76  |
| CDK4-cyclinD3       | CDK4     | 70  |
| CDK5                | CDK5     | 98  |
| CDK7                | CDK7     | 56  |
| CDK8                | CDK8     | 99  |
| CDK9                | CDK9     | 92  |
| CDKL1               | CDKL1    | 77  |
| CDKL2               | CDKL2    | 91  |
| CDKL3               | CDKL3    | 100 |
| CDKL5               | CDKL5    | 95  |
| CHEK1               | CHEK1    | 100 |
| CHEK2               | CHEK2    | 54  |
| CIT                 | CIT      | 74  |
| CLK1                | CLK1     | 87  |
| CLK2                | CLK2     | 82  |
| CLK3                | CLK3     | 93  |
| CLK4                | CLK4     | 66  |
| CSF1R               | CSF1R    | 90  |
| CSF1R-autoinhibited | CSF1R    | 93  |
| CSK                 | CSK      | 85  |
| CSNK1A1             | CSNK1A1  | 74  |
| CSNK1A1L            | CSNK1A1L | 86  |
| CSNK1D              | CSNK1D   | 92  |
| CSNK1E              | CSNK1E   | 98  |
| CSNK1G1             | CSNK1G1  | 91  |
| CSNK1G2             | CSNK1G2  | 92  |
| CSNK1G3             | CSNK1G3  | 98  |
| CSNK2A1             | CSNK2A1  | 25  |

|                           |          |     |
|---------------------------|----------|-----|
| CSNK2A2                   | CSNK2A2  | 7.3 |
| CTK                       | MATK     | 90  |
| DAPK1                     | DAPK1    | 99  |
| DAPK2                     | DAPK2    | 93  |
| DAPK3                     | DAPK3    | 95  |
| DCAMKL1                   | DCLK1    | 85  |
| DCAMKL2                   | DCLK2    | 100 |
| DCAMKL3                   | DCLK3    | 46  |
| DDR1                      | DDR1     | 100 |
| DDR2                      | DDR2     | 100 |
| DLK                       | MAP3K12  | 97  |
| DMPK                      | DMPK     | 93  |
| DMPK2                     | CDC42BPG | 95  |
| DRAK1                     | STK17A   | 92  |
| DRAK2                     | STK17B   | 94  |
| DYRK1A                    | DYRK1A   | 71  |
| DYRK1B                    | DYRK1B   | 87  |
| DYRK2                     | DYRK2    | 97  |
| EGFR                      | EGFR     | 94  |
| EGFR(E746-A750del)        | EGFR     | 100 |
| EGFR(G719C)               | EGFR     | 89  |
| EGFR(G719S)               | EGFR     | 78  |
| EGFR(L747-E749del, A750P) | EGFR     | 96  |
| EGFR(L747-S752del, P753S) | EGFR     | 100 |
| EGFR(L747-T751del,Sins)   | EGFR     | 78  |
| EGFR(L858R)               | EGFR     | 98  |
| EGFR(L858R,T790M)         | EGFR     | 82  |
| EGFR(L861Q)               | EGFR     | 85  |
| EGFR(S752-I759del)        | EGFR     | 95  |
| EGFR(T790M)               | EGFR     | 62  |
| EIF2AK1                   | EIF2AK1  | 69  |
| EPHA1                     | EPHA1    | 83  |
| EPHA2                     | EPHA2    | 92  |
| EPHA3                     | EPHA3    | 91  |
| EPHA4                     | EPHA4    | 96  |
| EPHA5                     | EPHA5    | 92  |
| EPHA6                     | EPHA6    | 100 |
| EPHA7                     | EPHA7    | 100 |
| EPHA8                     | EPHA8    | 100 |
| EPHB1                     | EPHB1    | 100 |
| EPHB2                     | EPHB2    | 100 |
| EPHB3                     | EPHB3    | 97  |
| EPHB4                     | EPHB4    | 95  |
| EPHB6                     | EPHB6    | 66  |
| ERBB2                     | ERBB2    | 96  |
| ERBB3                     | ERBB3    | 93  |
| ERBB4                     | ERBB4    | 92  |
| ERK1                      | MAPK3    | 98  |

|                       |         |     |
|-----------------------|---------|-----|
| ERK2                  | MAPK1   | 93  |
| ERK3                  | MAPK6   | 100 |
| ERK4                  | MAPK4   | 100 |
| ERK5                  | MAPK7   | 96  |
| ERK8                  | MAPK15  | 41  |
| ERN1                  | ERN1    | 73  |
| FAK                   | PTK2    | 93  |
| FER                   | FER     | 95  |
| FES                   | FES     | 100 |
| FGFR1                 | FGFR1   | 96  |
| FGFR2                 | FGFR2   | 88  |
| FGFR3                 | FGFR3   | 99  |
| FGFR3(G697C)          | FGFR3   | 83  |
| FGFR4                 | FGFR4   | 100 |
| FGR                   | FGR     | 88  |
| FLT1                  | FLT1    | 93  |
| FLT3                  | FLT3    | 93  |
| FLT3(D835H)           | FLT3    | 72  |
| FLT3(D835V)           | FLT3    | 20  |
| FLT3(D835Y)           | FLT3    | 50  |
| FLT3(ITD)             | FLT3    | 88  |
| FLT3(ITD,D835V)       | FLT3    | 67  |
| FLT3(ITD,F691L)       | FLT3    | 88  |
| FLT3(K663Q)           | FLT3    | 68  |
| FLT3(N841I)           | FLT3    | 70  |
| FLT3(R834Q)           | FLT3    | 97  |
| FLT3-autoinhibited    | FLT3    | 97  |
| FLT4                  | FLT4    | 93  |
| FRK                   | FRK     | 96  |
| FYN                   | FYN     | 97  |
| GAK                   | GAK     | 78  |
| GCN2(Kin.Dom.2,S808G) | EIF2AK4 | 100 |
| GRK1                  | GRK1    | 74  |
| GRK2                  | ADRBK1  | 100 |
| GRK3                  | ADRBK2  | 95  |
| GRK4                  | GRK4    | 100 |
| GRK7                  | GRK7    | 76  |
| GSK3A                 | GSK3A   | 43  |
| GSK3B                 | GSK3B   | 66  |
| HASPIN                | GSG2    | 81  |
| HCK                   | HCK     | 82  |
| HIPK1                 | HIPK1   | 61  |
| HIPK2                 | HIPK2   | 71  |
| HIPK3                 | HIPK3   | 62  |
| HIPK4                 | HIPK4   | 67  |
| HPK1                  | MAP4K1  | 100 |
| HUNK                  | HUNK    | 92  |
| ICK                   | ICK     | 67  |

|                              |         |     |
|------------------------------|---------|-----|
| IGF1R                        | IGF1R   | 90  |
| IKK-alpha                    | CHUK    | 76  |
| IKK-beta                     | IKBKB   | 79  |
| IKK-epsilon                  | IKBKE   | 73  |
| INSR                         | INSR    | 77  |
| INSRR                        | INSRR   | 100 |
| IRAK1                        | IRAK1   | 68  |
| IRAK3                        | IRAK3   | 94  |
| IRAK4                        | IRAK4   | 68  |
| ITK                          | ITK     | 100 |
| JAK1(JH1domain-catalytic)    | JAK1    | 86  |
| JAK1(JH2domain-pseudokinase) | JAK1    | 90  |
| JAK2(JH1domain-catalytic)    | JAK2    | 75  |
| JAK3(JH1domain-catalytic)    | JAK3    | 62  |
| JNK1                         | MAPK8   | 61  |
| JNK2                         | MAPK9   | 78  |
| JNK3                         | MAPK10  | 76  |
| KIT                          | KIT     | 93  |
| KIT(A829P)                   | KIT     | 96  |
| KIT(D816H)                   | KIT     | 88  |
| KIT(D816V)                   | KIT     | 92  |
| KIT(L576P)                   | KIT     | 89  |
| KIT(V559D)                   | KIT     | 92  |
| KIT(V559D,T670I)             | KIT     | 95  |
| KIT(V559D,V654A)             | KIT     | 96  |
| KIT-autoinhibited            | KIT     | 91  |
| LATS1                        | LATS1   | 97  |
| LATS2                        | LATS2   | 60  |
| LCK                          | LCK     | 78  |
| LIMK1                        | LIMK1   | 100 |
| LIMK2                        | LIMK2   | 97  |
| LKB1                         | STK11   | 88  |
| LOK                          | STK10   | 96  |
| LRRK2                        | LRRK2   | 45  |
| LRRK2(G2019S)                | LRRK2   | 100 |
| LTK                          | LTK     | 99  |
| LYN                          | LYN     | 100 |
| LZK                          | MAP3K13 | 74  |
| MAK                          | MAK     | 100 |
| MAP3K1                       | MAP3K1  | 80  |
| MAP3K15                      | MAP3K15 | 47  |
| MAP3K2                       | MAP3K2  | 82  |
| MAP3K3                       | MAP3K3  | 72  |
| MAP3K4                       | MAP3K4  | 85  |
| MAP4K2                       | MAP4K2  | 93  |
| MAP4K3                       | MAP4K3  | 100 |
| MAP4K4                       | MAP4K4  | 90  |
| MAP4K5                       | MAP4K5  | 90  |

|             |          |     |
|-------------|----------|-----|
| MAPKAPK2    | MAPKAPK2 | 91  |
| MAPKAPK5    | MAPKAPK5 | 82  |
| MARK1       | MARK1    | 92  |
| MARK2       | MARK2    | 89  |
| MARK3       | MARK3    | 96  |
| MARK4       | MARK4    | 92  |
| MAST1       | MAST1    | 72  |
| MEK1        | MAP2K1   | 78  |
| MEK2        | MAP2K2   | 82  |
| MEK3        | MAP2K3   | 88  |
| MEK4        | MAP2K4   | 83  |
| MEK5        | MAP2K5   | 71  |
| MEK6        | MAP2K6   | 72  |
| MELK        | MELK     | 85  |
| MERTK       | MERTK    | 82  |
| MET         | MET      | 97  |
| MET(M1250T) | MET      | 91  |
| MET(Y1235D) | MET      | 99  |
| MINK        | MINK1    | 89  |
| MKK7        | MAP2K7   | 88  |
| MKNK1       | MKNK1    | 98  |
| MKNK2       | MKNK2    | 76  |
| MLCK        | MYLK3    | 84  |
| MLK1        | MAP3K9   | 92  |
| MLK2        | MAP3K10  | 66  |
| MLK3        | MAP3K11  | 92  |
| MRCKA       | CDC42BPA | 90  |
| MRCKB       | CDC42BPB | 100 |
| MST1        | STK4     | 87  |
| MST1R       | MST1R    | 97  |
| MST2        | STK3     | 63  |
| MST3        | STK24    | 100 |
| MST4        | MST4     | 73  |
| MTOR        | MTOR     | 66  |
| MUSK        | MUSK     | 100 |
| MYLK        | MYLK     | 95  |
| MYLK2       | MYLK2    | 96  |
| MYLK4       | MYLK4    | 85  |
| MYO3A       | MYO3A    | 84  |
| MYO3B       | MYO3B    | 99  |
| NDR1        | STK38    | 91  |
| NDR2        | STK38L   | 89  |
| NEK1        | NEK1     | 84  |
| NEK10       | NEK10    | 80  |
| NEK11       | NEK11    | 86  |
| NEK2        | NEK2     | 87  |
| NEK3        | NEK3     | 87  |
| NEK4        | NEK4     | 87  |

|                       |             |     |
|-----------------------|-------------|-----|
| NEK5                  | NEK5        | 100 |
| NEK6                  | NEK6        | 94  |
| NEK7                  | NEK7        | 92  |
| NEK9                  | NEK9        | 89  |
| NIK                   | MAP3K14     | 68  |
| NIM1                  | MGC42105    | 65  |
| NLK                   | NLK         | 96  |
| OSR1                  | OXS1        | 82  |
| p38-alpha             | MAPK14      | 93  |
| p38-beta              | MAPK11      | 95  |
| p38-delta             | MAPK13      | 100 |
| p38-gamma             | MAPK12      | 70  |
| PAK1                  | PAK1        | 59  |
| PAK2                  | PAK2        | 82  |
| PAK3                  | PAK3        | 84  |
| PAK4                  | PAK4        | 82  |
| PAK6                  | PAK6        | 95  |
| PAK7                  | PAK7        | 90  |
| PCK1                  | CDK16       | 90  |
| PCK2                  | CDK17       | 96  |
| PCK3                  | CDK18       | 97  |
| PDGFRA                | PDGFRA      | 76  |
| PDGFRB                | PDGFRB      | 80  |
| PDPK1                 | PDPK1       | 83  |
| PFCDPK1(P.falciparum) | CDPK1       | 28  |
| PFPK5(P.falciparum)   | MAL13P1.279 | 97  |
| PFTAIRE2              | CDK15       | 86  |
| PFTK1                 | CDK14       | 90  |
| PHKG1                 | PHKG1       | 100 |
| PHKG2                 | PHKG2       | 96  |
| PIK3C2B               | PIK3C2B     | 76  |
| PIK3C2G               | PIK3C2G     | 55  |
| PIK3CA                | PIK3CA      | 67  |
| PIK3CA(C420R)         | PIK3CA      | 81  |
| PIK3CA(E542K)         | PIK3CA      | 70  |
| PIK3CA(E545A)         | PIK3CA      | 83  |
| PIK3CA(E545K)         | PIK3CA      | 72  |
| PIK3CA(H1047L)        | PIK3CA      | 78  |
| PIK3CA(H1047Y)        | PIK3CA      | 87  |
| PIK3CA(I800L)         | PIK3CA      | 46  |
| PIK3CA(M1043I)        | PIK3CA      | 97  |
| PIK3CA(Q546K)         | PIK3CA      | 81  |
| PIK3CB                | PIK3CB      | 80  |
| PIK3CD                | PIK3CD      | 32  |
| PIK3CG                | PIK3CG      | 37  |
| PIK4CB                | PI4KB       | 66  |
| PIKFYVE               | PIKFYVE     | 91  |
| PIM1                  | PIM1        | 84  |

|                               |          |     |
|-------------------------------|----------|-----|
| PIM2                          | PIM2     | 100 |
| PIM3                          | PIM3     | 87  |
| PIP5K1A                       | PIP5K1A  | 97  |
| PIP5K1C                       | PIP5K1C  | 7.3 |
| PIP5K2B                       | PIP4K2B  | 100 |
| PIP5K2C                       | PIP4K2C  | 50  |
| PKAC-alpha                    | PRKACA   | 100 |
| PKAC-beta                     | PRKACB   | 91  |
| PKMYT1                        | PKMYT1   | 93  |
| PKN1                          | PKN1     | 77  |
| PKN2                          | PKN2     | 87  |
| PKNB(M.tuberculosis)          | pknB     | 67  |
| PLK1                          | PLK1     | 44  |
| PLK2                          | PLK2     | 65  |
| PLK3                          | PLK3     | 58  |
| PLK4                          | PLK4     | 80  |
| PRKCD                         | PRKCD    | 96  |
| PRKCE                         | PRKCE    | 100 |
| PRKCH                         | PRKCH    | 91  |
| PRKCI                         | PRKCI    | 61  |
| PRKCQ                         | PRKCQ    | 78  |
| PRKD1                         | PRKD1    | 97  |
| PRKD2                         | PRKD2    | 100 |
| PRKD3                         | PRKD3    | 97  |
| PRKG1                         | PRKG1    | 88  |
| PRKG2                         | PRKG2    | 76  |
| PRKR                          | EIF2AK2  | 64  |
| PRKX                          | PRKX     | 94  |
| PRP4                          | PRPF4B   | 100 |
| PYK2                          | PTK2B    | 75  |
| QSK                           | KIAA0999 | 82  |
| RAF1                          | RAF1     | 91  |
| RET                           | RET      | 100 |
| RET(M918T)                    | RET      | 93  |
| RET(V804L)                    | RET      | 90  |
| RET(V804M)                    | RET      | 84  |
| RIOK1                         | RIOK1    | 92  |
| RIOK2                         | RIOK2    | 68  |
| RIOK3                         | RIOK3    | 69  |
| RIPK1                         | RIPK1    | 98  |
| RIPK2                         | RIPK2    | 96  |
| RIPK4                         | RIPK4    | 79  |
| RIPK5                         | DSTYK    | 77  |
| ROCK1                         | ROCK1    | 61  |
| ROCK2                         | ROCK2    | 78  |
| ROS1                          | ROS1     | 98  |
| RPS6KA4(Kin.Dom.1-N-terminal) | RPS6KA4  | 95  |
| RPS6KA4(Kin.Dom.2-C-terminal) | RPS6KA4  | 84  |



|                               |         |      |
|-------------------------------|---------|------|
| RPS6KA5(Kin.Dom.1-N-terminal) | RPS6KA5 | 90   |
| RPS6KA5(Kin.Dom.2-C-terminal) | RPS6KA5 | 90   |
| RSK1(Kin.Dom.1-N-terminal)    | RPS6KA1 | 92   |
| RSK1(Kin.Dom.2-C-terminal)    | RPS6KA1 | 100  |
| RSK2(Kin.Dom.1-N-terminal)    | RPS6KA3 | 74   |
| RSK2(Kin.Dom.2-C-terminal)    | RPS6KA3 | 83   |
| RSK3(Kin.Dom.1-N-terminal)    | RPS6KA2 | 93   |
| RSK3(Kin.Dom.2-C-terminal)    | RPS6KA2 | 100  |
| RSK4(Kin.Dom.1-N-terminal)    | RPS6KA6 | 70   |
| RSK4(Kin.Dom.2-C-terminal)    | RPS6KA6 | 100  |
| S6K1                          | RPS6KB1 | 88   |
| SBK1                          | SBK1    | 73   |
| SGK                           | SGK1    | 90   |
| SgK110                        | SgK110  | 94   |
| SGK2                          | SGK2    | 82   |
| SGK3                          | SGK3    | 85   |
| SIK                           | SIK1    | 94   |
| SIK2                          | SIK2    | 100  |
| SLK                           | SLK     | 78   |
| SNARK                         | NUAK2   | 73   |
| SNRK                          | SNRK    | 97   |
| SRC                           | SRC     | 90   |
| SRMS                          | SRMS    | 100  |
| SRPK1                         | SRPK1   | 91   |
| SRPK2                         | SRPK2   | 94   |
| SRPK3                         | SRPK3   | 93   |
| STK16                         | STK16   | 76   |
| STK33                         | STK33   | 88   |
| STK35                         | STK35   | 100  |
| STK36                         | STK36   | 100  |
| STK39                         | STK39   | 66   |
| SYK                           | SYK     | 84   |
| TAK1                          | MAP3K7  | 0.85 |
| TAOK1                         | TAOK1   | 94   |
| TAOK2                         | TAOK2   | 92   |
| TAOK3                         | TAOK3   | 89   |
| TBK1                          | TBK1    | 76   |
| TEC                           | TEC     | 100  |
| TESK1                         | TESK1   | 77   |
| TGFBR1                        | TGFBR1  | 95   |
| TGFBR2                        | TGFBR2  | 93   |
| TIE1                          | TIE1    | 100  |
| TIE2                          | TEK     | 93   |
| TLK1                          | TLK1    | 96   |
| TLK2                          | TLK2    | 57   |
| TNIK                          | TNIK    | 88   |
| TNK1                          | TNK1    | 100  |
| TNK2                          | TNK2    | 87   |

|                              |         |    |
|------------------------------|---------|----|
| TNNI3K                       | TNNI3K  | 86 |
| TRKA                         | NTRK1   | 75 |
| TRKB                         | NTRK2   | 79 |
| TRKC                         | NTRK3   | 88 |
| TRPM6                        | TRPM6   | 96 |
| TSSK1B                       | TSSK1B  | 92 |
| TSSK3                        | TSSK3   | 94 |
| TTK                          | TTK     | 86 |
| TXK                          | TXK     | 82 |
| TYK2(JH1domain-catalytic)    | TYK2    | 84 |
| TYK2(JH2domain-pseudokinase) | TYK2    | 62 |
| TYRO3                        | TYRO3   | 68 |
| ULK1                         | ULK1    | 68 |
| ULK2                         | ULK2    | 72 |
| ULK3                         | ULK3    | 76 |
| VEGFR2                       | KDR     | 99 |
| VPS34                        | PIK3C3  | 81 |
| VRK2                         | VRK2    | 92 |
| WEE1                         | WEE1    | 81 |
| WEE2                         | WEE2    | 87 |
| WNK1                         | WNK1    | 72 |
| WNK2                         | WNK2    | 89 |
| WNK3                         | WNK3    | 77 |
| WNK4                         | WNK4    | 98 |
| YANK1                        | STK32A  | 54 |
| YANK2                        | STK32B  | 95 |
| YANK3                        | STK32C  | 99 |
| YES                          | YES1    | 88 |
| YSK1                         | STK25   | 78 |
| YSK4                         | MAP3K19 | 62 |
| ZAK                          | ZAK     | 77 |
| ZAP70                        | ZAP70   | 89 |

## Crystallographic Data

**Crystallization.** Crystals of TAK1 in complex with **22** were obtained using sitting drop vapor diffusion set-ups. TAK1 at a concentration of 9.9 mg/ml (20 mM Hepes/sodium hydroxide, 200 mM sodium chloride, 10% (v/v) glycerol, 5 mM DTT, pH 8.0) was pre-incubated with 2 mM (7.2-fold molar excess) of adenosine (100 mM in DMSO) for 1 h at 4°C. 0.9  $\mu$ L of the protein solution was then mixed with 0.9  $\mu$ L of reservoir solution (0.10 M Tris/HCl pH 7.9, 0.60 M sodium citrate, 0.60 M sodium chloride) and equilibrated at 20°C over 60  $\mu$ L of reservoir solution. Well diffracting crystals grew to full size over 6 days. Crystals were soaked for 1 day with **22** (150 mM in DMSO, 2-fold diluted with reservoir solution: 1  $\mu$ L of the diluted solution was directly added to the drop).

Crystals of TAK1 in complex with **54** were obtained using sitting drop vapor diffusion set-ups. TAK1 at a concentration of 9.9 mg/ml (20 mM Hepes/sodium hydroxide, 200 mM sodium chloride, 10% (v/v) glycerol, 5 mM DTT, pH 8.0) was pre-incubated with 2 mM (7.2-fold molar excess) of adenosine (100 mM in DMSO) for 1 h at 4°C. 1.0  $\mu$ L of the protein solution was then mixed with 1.0  $\mu$ L of reservoir solution (0.10 M Tris/HCl pH 7.6, 0.60 M sodium citrate, 0.30 M sodium chloride) and equilibrated at 20°C over 60  $\mu$ L of reservoir solution. Well diffracting crystals grew to full size over 7 days. Crystals were soaked for 5 h with 20 nM **54** (150 mM in DMSO, diluted with reservoir solution to 40 mM. 1  $\mu$ L of the diluted solution was then added to the drop containing suitable crystals).

**Data Collection.** Complete data sets of TAK1-**22** and TAK1-**54** crystals were collected at the ESRF synchrotron radiation source (Grenoble, FR, beamline ID30a1) (Table S1).

| <b>Table S1: Data collection statistics</b> |                                                               |                                                               |
|---------------------------------------------|---------------------------------------------------------------|---------------------------------------------------------------|
| Inhibitor                                   | <b>22</b>                                                     | <b>54</b>                                                     |
| Space group                                 | I222                                                          | I222                                                          |
| Unit cell parameters (Å)                    | a=58.4, b=134.8,<br>c=145.5<br>$\alpha=\beta=\gamma=90^\circ$ | a=58.4, b=134.8,<br>c=145.5<br>$\alpha=\beta=\gamma=90^\circ$ |
| Resolution (Å)                              | 28.6-1.98 (2.09-1.98)                                         | 29.21-1.97 (2.08-1.97)                                        |
| # Unique reflections                        | 37946 (6025)                                                  | 40707 (5958)                                                  |
| I/ $\sigma$ (I)                             | 10.9 (1.9)                                                    | 7.1 (1.4)                                                     |
| Completeness (%)                            | 90.5 (99.2)                                                   | 99.3 (99.9)                                                   |
| Multiplicity                                | 3.0 (3.1)                                                     | 3.3 (3.3)                                                     |
| R <sub>meas</sub>                           | 0.072 (0.693)                                                 | 0.100 (0.530)                                                 |

**Structure determination and refinement.** Molecular replacement was done using a published structure of MAP3K7 (PDB accession code 5JGA) as starting model. Several rounds of alternating manual rebuilding and refinement with REFMAC5 resulted in the final model<sup>3</sup> (Table S2).

|                     |                        |                        |
|---------------------|------------------------|------------------------|
| Inhibitor           | <b>22</b>              | <b>54</b>              |
| Resolution (Å)      | 30.00-1.98 (2.03-1.98) | 29.21-1.97 (2.02-1.97) |
| R <sub>work</sub>   | 0.221 (0.459)          | 0.180 (0.329)          |
| R <sub>free</sub>   | 0.249 (0.439)          | 0.225 (0.322)          |
| Completeness (%)    | 89.9 (99.0)            | 97.1 (99.8)            |
| r.m.s.d. bonds (Å)  | 0.014                  | 0.013                  |
| r.m.s.d. angles (°) | 1.7                    | 1.582                  |

The coordinates of the structures **22** and **54** will be deposited in the PDB upon publication.

### Supplementary Figure S-1.

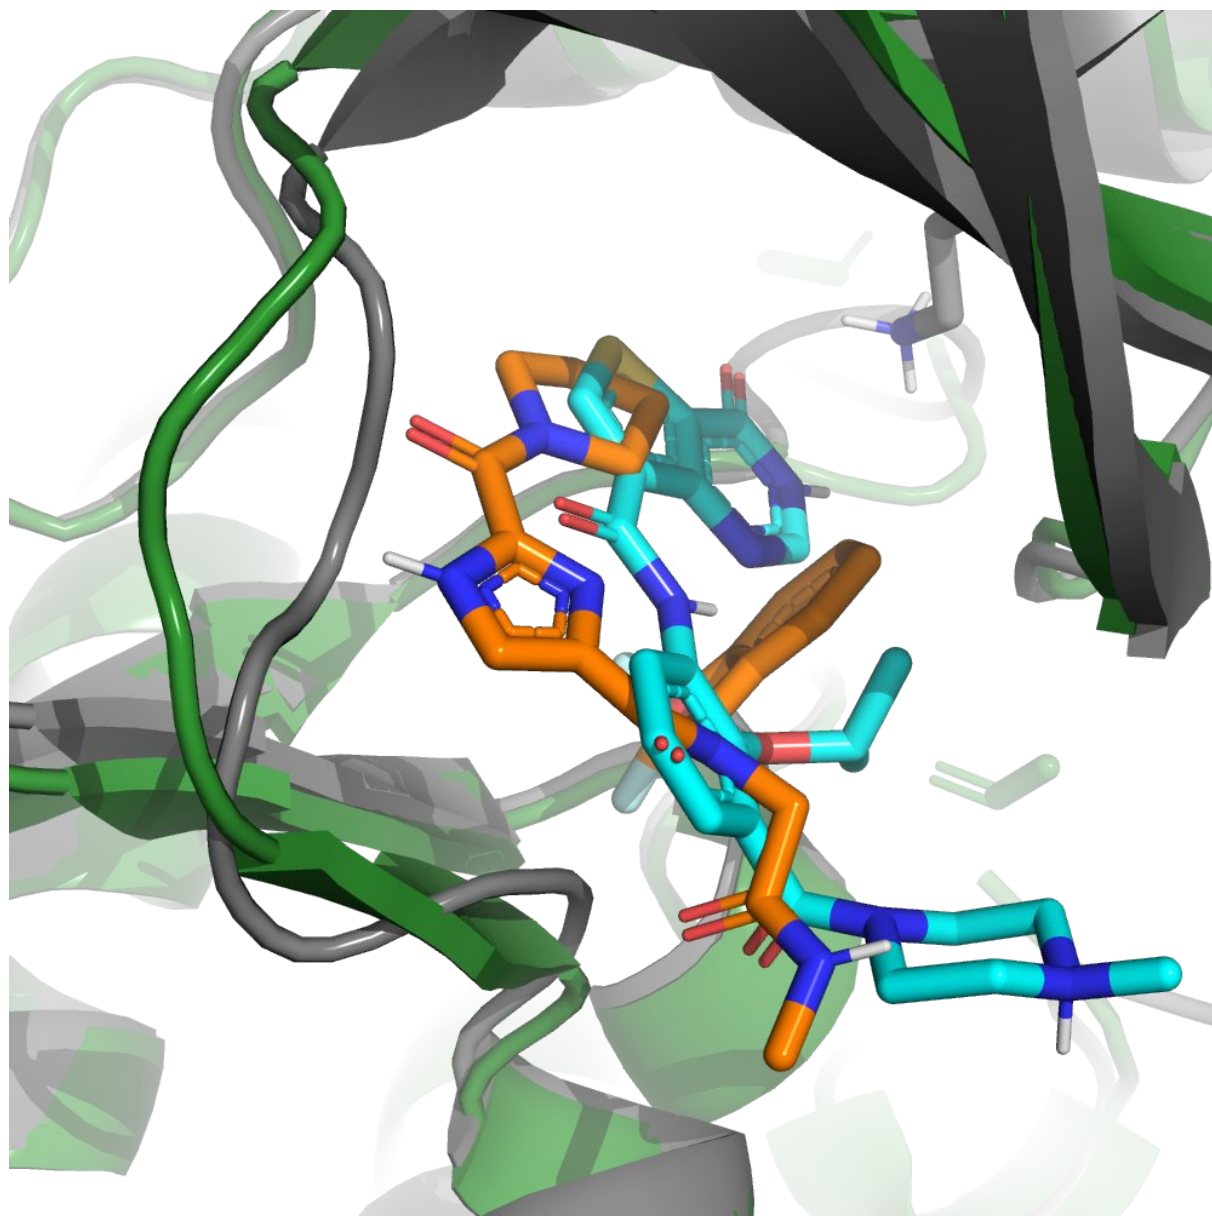

**Supplementary Figure S-1:** Overlay of the structures of compound **22** (orange and green) with **3** (grey and cyan, PDB ID code: 5JGD). Key lysine residue depicted.

### References

- (1) Litovchick, A.; Dumelin, C.E.; Habeshian, S.; Gikunju, D.; Guié, M.-A.; Centrella, P.; Zhang, Y.; Sigel, E.A.; Cuozzo, J.W.; Keefe, A.D.; Clark, M.A. Encoded library synthesis using chemical ligation and the discovery of sEH inhibitors from a 334-million member library. *Scientific Reports* **2015**, 5(1):10916.
- (2) Fernández-Montalván, A.E.; Berger, M.; Kuropka, B.; Koo, S.J.; Badock, V.; Weiske, J.; Puetter, V.; Holton, S.J.; Stöckigt, D.; ter Laak, A.; Centrella, P.A.; Clark, M.A.;

Dumelin, C.E.; Sigel, E.A.; Soutter, H.H.; Troast, D.M.; Zhang, Y.; Cuzzo, J.W.; Keefe, A.D.; Roche, D.; Rodeschini, V.; Chaikuad, A.; Díaz-Sáez, L.; Bennett, J.M.; Fedorov, O; Huber, K.V.M.; Jan Hübner, J.; Weinmann, H.; Hartung, I.V.; Gorjánác, M. Isoform-Selective ATAD2 Chemical Probe with Novel Chemical Structure and Unusual Mode of Action. *ACS Chem. Biol.* **2017**, *12*, 2730–2736.

- (3) Murshudov, G. N.; Vagin, A. A.; Dodson, E. J. Refinement of macromolecular structures by the maximum-likelihood method. *Acta Cryst.* **1997**, *D53*, 240–255.
